# Supplementary material for: Being negative can be positive: metal oxide anions promise more selective methane to methanol conversion
Source: Royal Society of Chemistry journal article supplement (doi:10.1039/d2cp02771b), 2022-01-01
Supplement: d2cp02771b1.pdf [file d2cp02771b1.pdf]

# Electronic Supplementary Information

Being negative can be positive: Metal oxide  
anions promise a more selective methane to  
methanol conversion

*Safaa Sader and Evangelos Miliordos\**

Department of Chemistry and Biochemistry, Auburn University, Auburn, AL 36849-5312, USA

**Corresponding Author**

\* E-mail: [emiliord@auburn.edu](mailto:emiliord@auburn.edu)

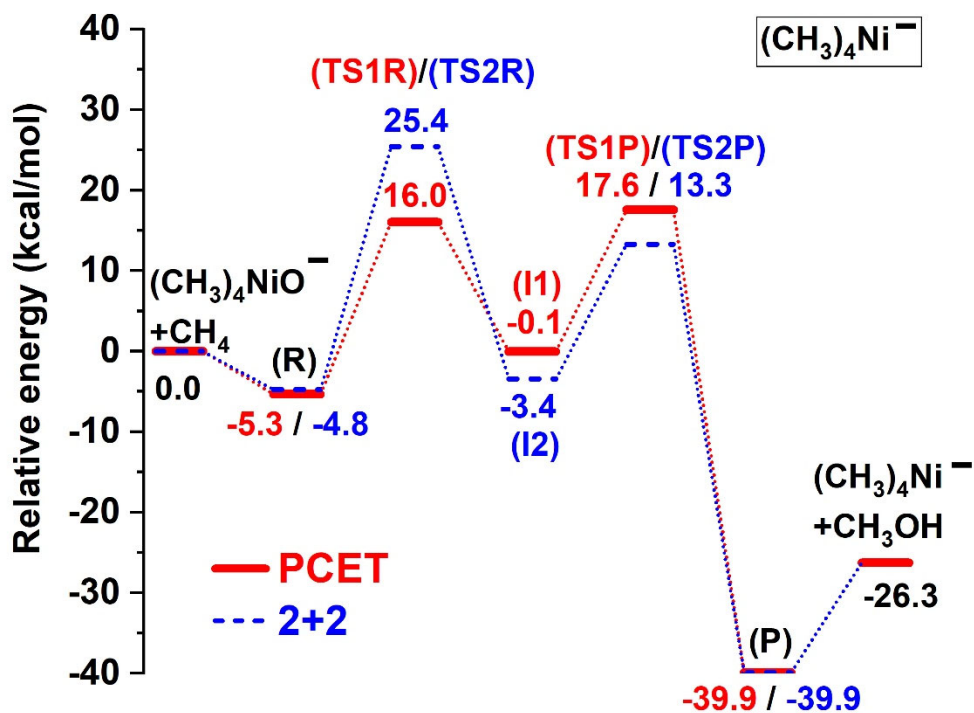

**Figure S1.** Energy diagram for the reaction  $(\text{CH}_3)_4\text{NiO}^- + \text{CH}_4 \rightarrow (\text{CH}_3)_4\text{Ni}^- + \text{CH}_3\text{OH}$  at the MN15/TZ level of theory.

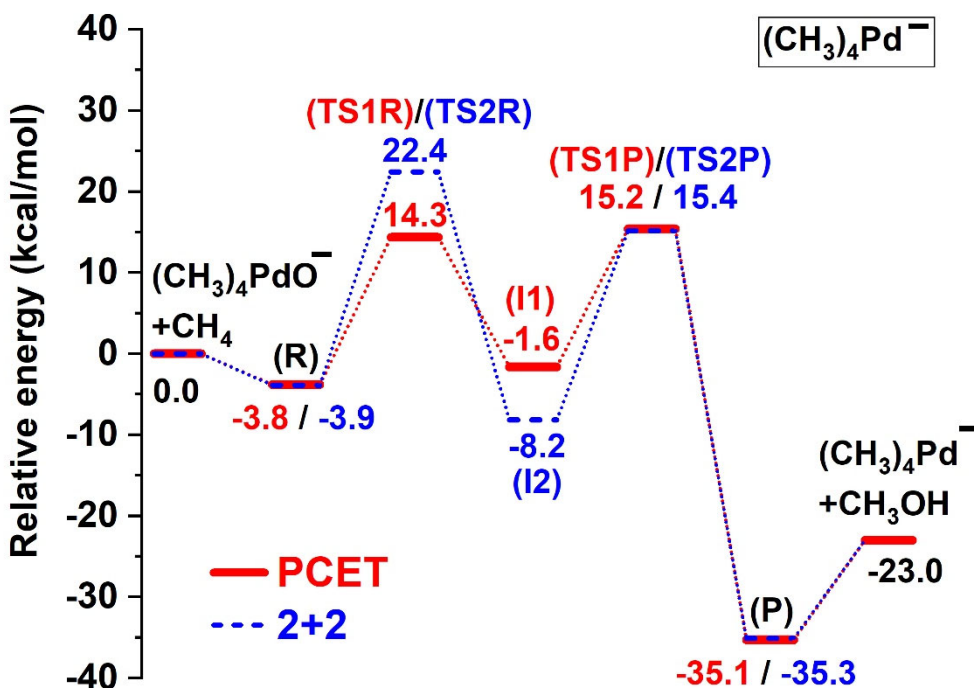

**Figure S2.** Energy diagram for the reaction  $(\text{CH}_3)_4\text{PdO}^- + \text{CH}_4 \rightarrow (\text{CH}_3)_4\text{Pd}^- + \text{CH}_3\text{OH}$  at the MN15/TZ level of theory.

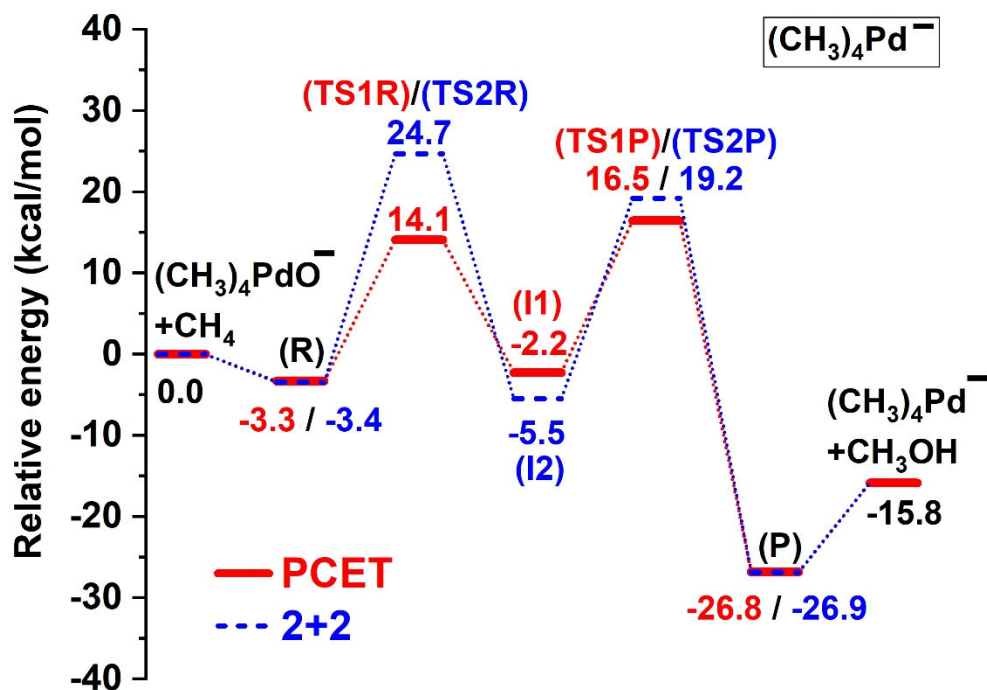

**Figure S3.** Energy diagram for the reaction  $(\text{CH}_3)_4\text{PdO}^- + \text{CH}_4 \rightarrow (\text{CH}_3)_4\text{Pd}^- + \text{CH}_3\text{OH}$  at the CCSD(T)/DZ//MN15/TZ level of theory.

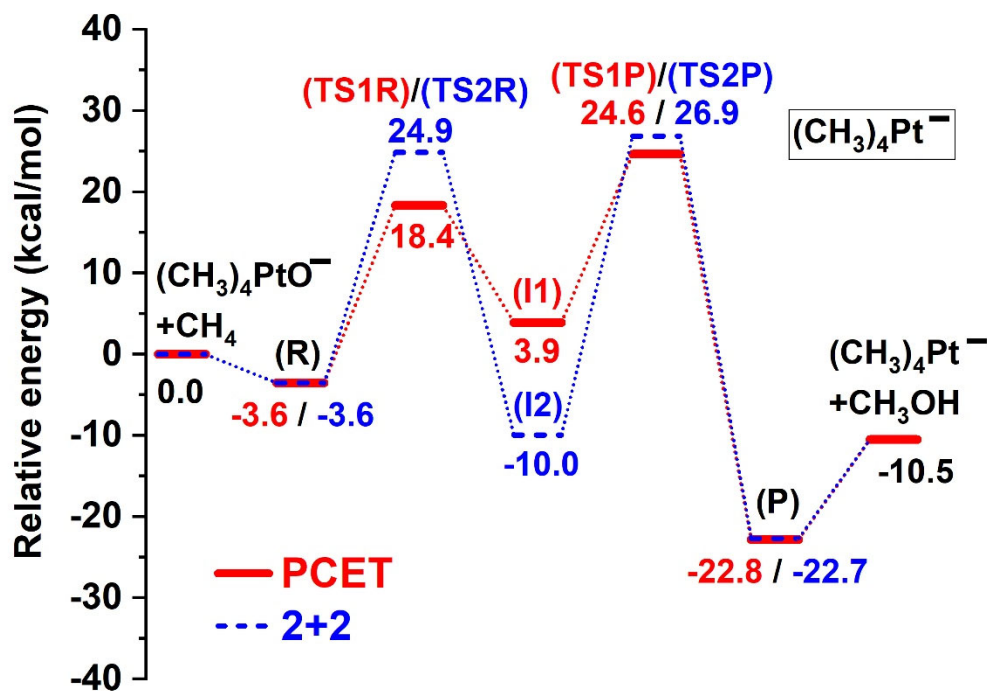

**Figure S4.** Energy diagram for the reaction  $(\text{CH}_3)_4\text{PtO}^- + \text{CH}_4 \rightarrow (\text{CH}_3)_4\text{Pt}^- + \text{CH}_3\text{OH}$  at the MN15/TZ level of theory.

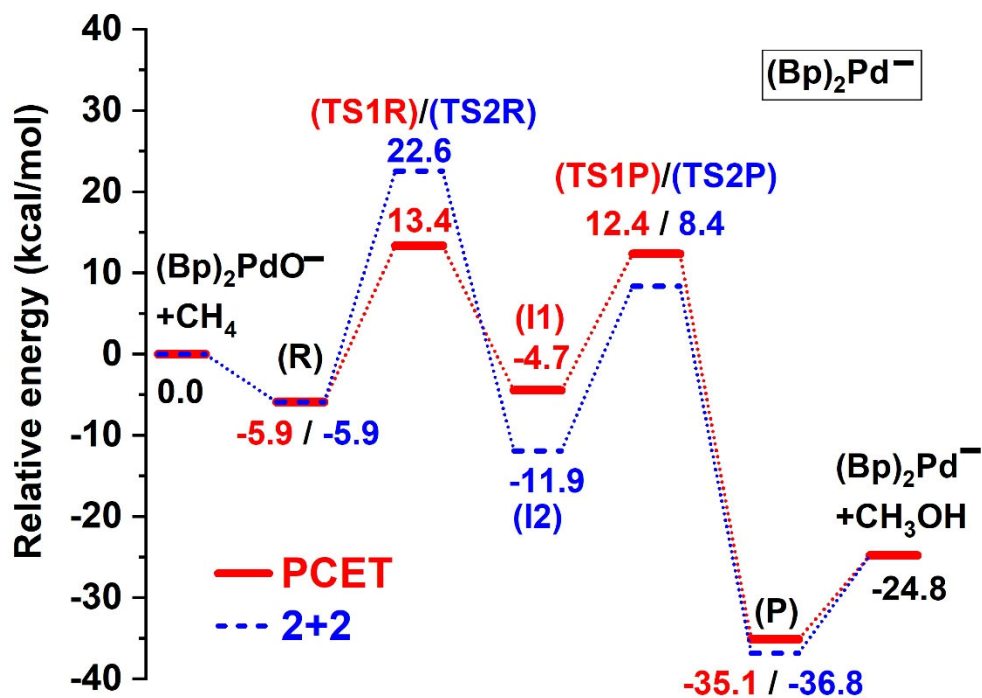

Figure S5. Energy diagram for the reaction  $(\text{Bp})_2\text{PdO}^- + \text{CH}_4 \rightarrow (\text{Bp})_2\text{Pd}^- + \text{CH}_3\text{OH}$  at the MN15/TZ level of theory.

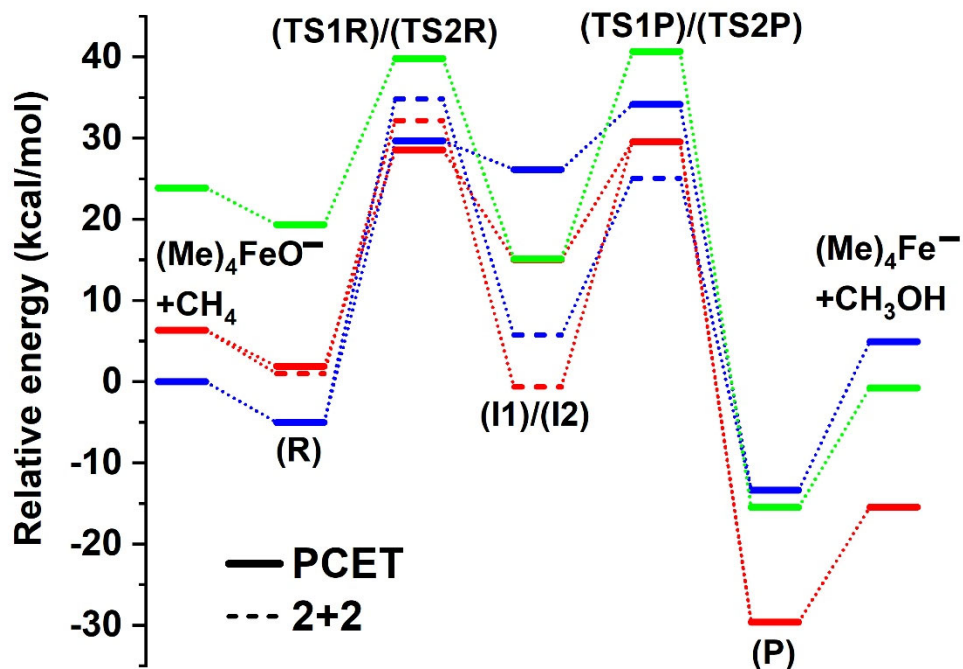

Figure S6. Energy diagram for the reaction  $(\text{CH}_3)_4\text{FeO}^- + \text{CH}_4 \rightarrow (\text{CH}_3)_4\text{Fe}^- + \text{CH}_3\text{OH}$  at the MN15/TZ level of theory. Blue/red/green correspond to doublet/quartet/sextet spin multiplicities.

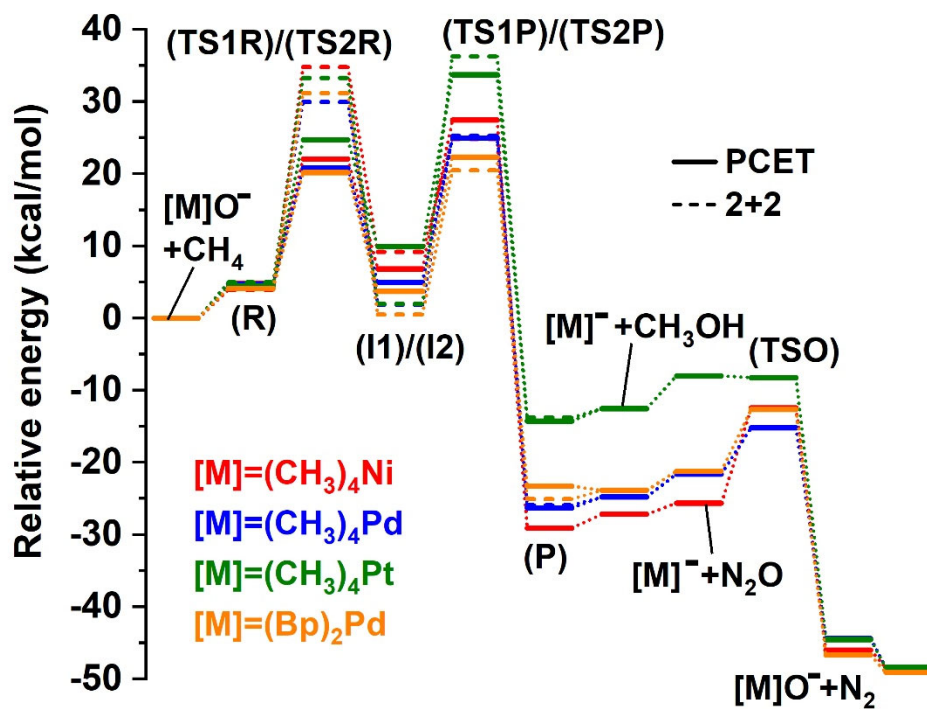

**Figure S7.** Free energy diagram for the reaction  $\text{CH}_4 + \text{N}_2\text{O} \rightarrow \text{CH}_3\text{OH} + \text{N}_2$  facilitated by  $[\text{M}]\text{O}^-$  at the MN15 level of theory.

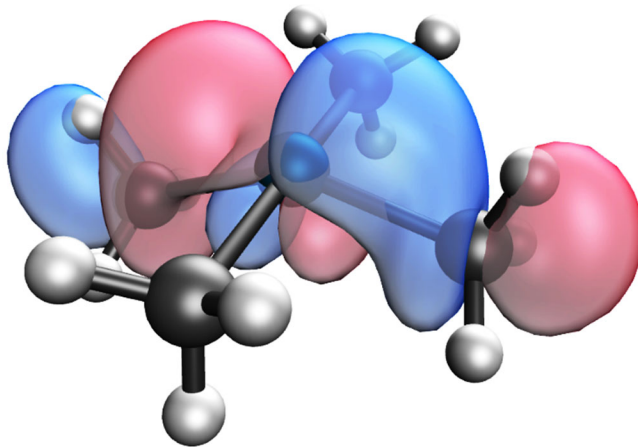

**Figure S8.** Contour for the singly occupied molecular orbital of  $(\text{CH}_3)_4\text{Pd}^-$ .

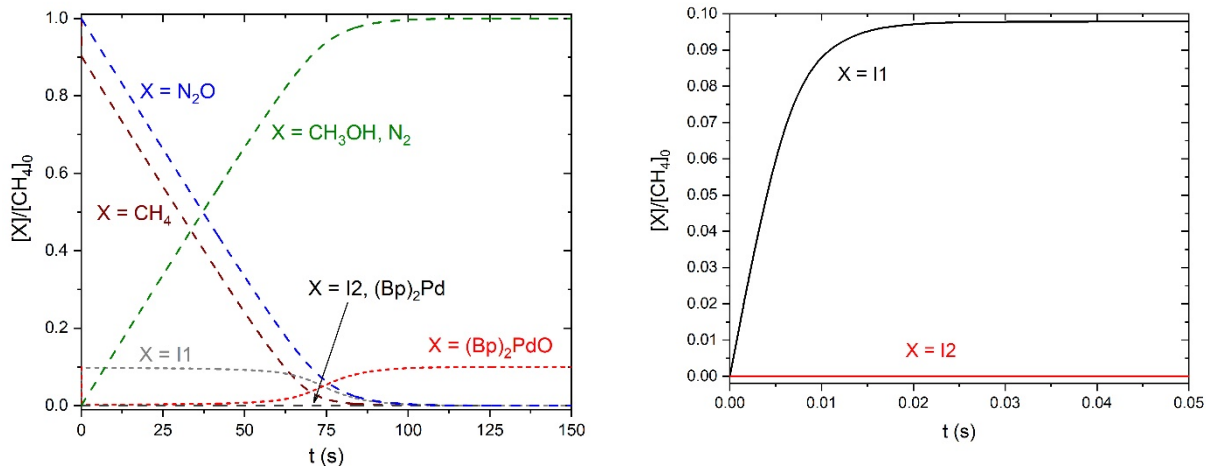

**Figure S9.** Left: Time evolution for the concentration of the species present in the reaction  $\text{CH}_4 + \text{N}_2\text{O} \rightarrow \text{CH}_3\text{OH} + \text{N}_2$  catalyzed by  $(\text{Bp})_2\text{PdO}^-$ . The concentrations are reported with respect to the initial concentration of  $\text{CH}_4$ ,  $[\text{CH}_4]_0$ , which is equal to that of  $\text{N}_2\text{O}$ . Right: Time evolution of intermediates I1 and I2 in the beginning of the reaction. [I2] remains zero throughout the reaction, while [I1] is nearly constant at approximately  $[\text{CH}_4]_0$  until close to the end of the reaction, where it gradually drops to zero.

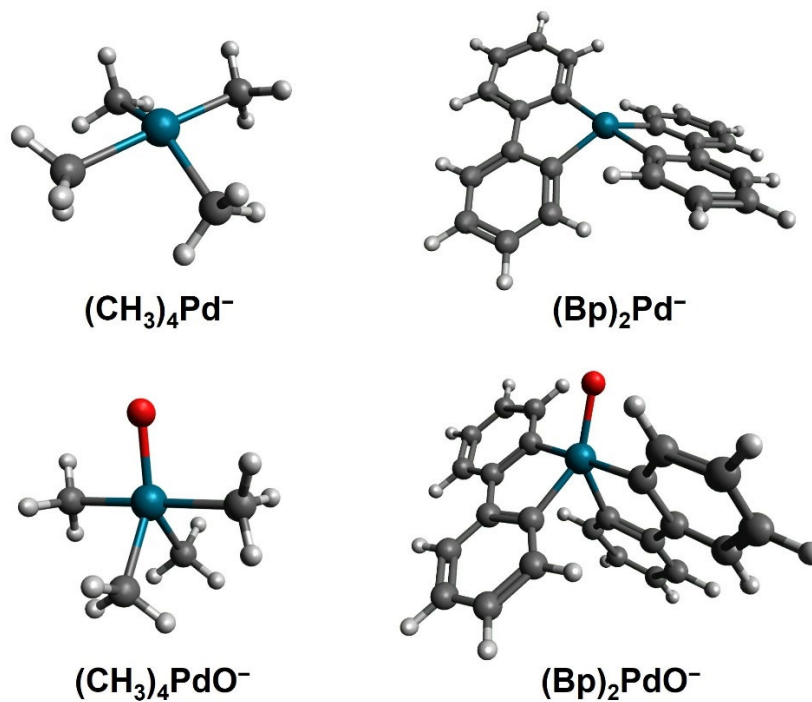

**Figure S10.** Structures (MN15) of the oxidized and reduced forms of the Pd catalysts.

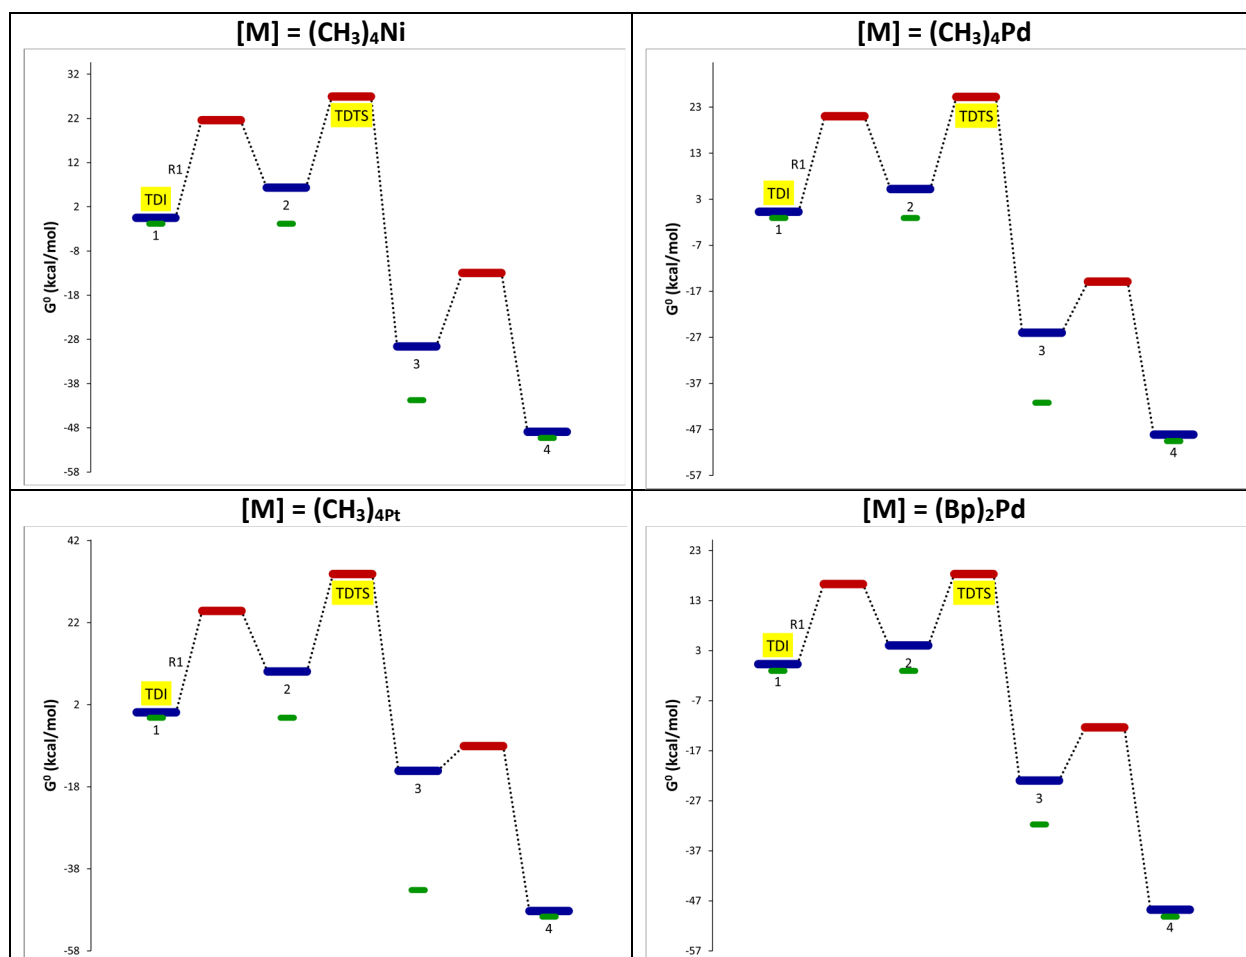

**Figure S11.** Free energy diagrams showing the TDI/TDS species for the  $[M]O^- + CH_4 + N_2O \rightarrow I1 + N_2O \rightarrow [M]^- + CH_3OH + N_2O \rightarrow [M]O^- + CH_3OH + N_2$ .

**Table S1.** Electronic energies (a.u.) for the lowest lying spin (S) states of the catalytic species considered presently. Adiabatic (EA, eV) and vertical electron affinities (VEA, eV) are reported for the neutral species.

| Species                                          | S   | MN15 <sup>a</sup>               |                                 |                     |       | CCSD(T) <sup>b</sup>            |       |
|--------------------------------------------------|-----|---------------------------------|---------------------------------|---------------------|-------|---------------------------------|-------|
|                                                  |     | -E <sub>optg</sub> <sup>c</sup> | -E <sub>vert</sub> <sup>d</sup> | EA                  | VEA   | -E <sub>vert</sub> <sup>b</sup> | VEA   |
| (CH <sub>3</sub> ) <sub>4</sub> Ni <sup>-</sup>  | 1/2 | 1668.058424                     |                                 |                     |       | 1666.389759                     |       |
| (CH <sub>3</sub> ) <sub>4</sub> Ni               | 0   | 1668.002843                     | 1667.949651                     | 1.512               | 2.960 | 1666.292250                     | 2.653 |
| (CH <sub>3</sub> ) <sub>4</sub> Ni               | 1   | 1667.966854                     | 1667.948204                     | 2.492               | 2.999 | 1666.282986                     | 2.905 |
| (CH <sub>3</sub> ) <sub>4</sub> NiO <sup>-</sup> | 1/2 | 1743.186788                     |                                 |                     |       | 1741.414060                     |       |
| (CH <sub>3</sub> ) <sub>4</sub> NiO              | 0   | 1743.206730                     | 1743.079366                     | -0.543 <sup>e</sup> | 2.923 | N/A <sup>f</sup>                |       |
| (CH <sub>3</sub> ) <sub>4</sub> NiO              | 1   | 1743.076477                     | 1743.062008                     | 3.002               | 3.395 | 1741.333709                     | 2.186 |
| (CH <sub>3</sub> ) <sub>4</sub> Pd <sup>-</sup>  | 1/2 | 286.692872                      |                                 |                     |       | 286.094914                      |       |
| (CH <sub>3</sub> ) <sub>4</sub> Pd               | 0   | 286.638032                      | 286.598756                      | 1.492               | 2.561 | 286.010978                      | 2.284 |
| (CH <sub>3</sub> ) <sub>4</sub> Pd               | 1   | 286.604351                      | 286.586138                      | 2.409               | 2.904 | 285.992145                      | 2.796 |
| (CH <sub>3</sub> ) <sub>4</sub> PdO <sup>-</sup> | 1/2 | 361.826440                      |                                 |                     |       | 361.128821                      |       |
| (CH <sub>3</sub> ) <sub>4</sub> PdO              | 0   | 361.720034                      | 361.711087                      | 2.895               | 3.139 | 361.015418                      | 3.086 |
| (CH <sub>3</sub> ) <sub>4</sub> PdO              | 1   | 361.714363                      | 361.702844                      | 3.050               | 3.363 | 361.008238                      | 3.281 |
| (CH <sub>3</sub> ) <sub>4</sub> Pt <sup>-</sup>  | 1/2 | 278.770734                      |                                 |                     |       | 278.232031                      |       |
| (CH <sub>3</sub> ) <sub>4</sub> Pt               | 0   | 278.711813                      | 278.676698                      | 1.603               | 2.559 | 278.145783                      | 2.347 |
| (CH <sub>3</sub> ) <sub>4</sub> Pt               | 1   | 278.680853                      | 278.651392                      | 2.446               | 3.247 | 278.116055                      | 3.156 |
| (CH <sub>3</sub> ) <sub>4</sub> PtO <sup>-</sup> | 1/2 | 353.924194                      |                                 |                     |       | 353.286322                      |       |
| (CH <sub>3</sub> ) <sub>4</sub> PtO              | 0   | 353.825762                      | 353.799498                      | 2.678               | 3.393 | 353.163947                      | 3.330 |
| (CH <sub>3</sub> ) <sub>4</sub> PtO              | 1   | 353.803981                      | 353.789634                      | 3.271               | 3.662 | N/A <sup>f</sup>                |       |
| (Bp) <sub>2</sub> Pd <sup>-</sup>                | 1/2 | 1050.425985                     |                                 |                     |       | N/A <sup>f</sup>                |       |
| (Bp) <sub>2</sub> Pd <sup>-</sup>                | 3/2 | 1050.323041                     | 1050.305382                     | 2.801               | 3.282 | N/A <sup>f</sup>                |       |
| (Bp) <sub>2</sub> Pd                             | 0   | 1050.338118                     | 1050.304059                     | 2.391               | 3.318 | N/A <sup>f</sup>                |       |
| (Bp) <sub>2</sub> Pd                             | 1   | 1050.291334                     | 1050.275015                     | 3.664               | 4.108 | N/A <sup>f</sup>                |       |
| (Bp) <sub>2</sub> PdO <sup>-</sup>               | 1/2 | 1125.541575                     |                                 |                     |       | N/A <sup>f</sup>                |       |
| (Bp) <sub>2</sub> PdO <sup>-</sup>               | 3/2 | 1125.476728                     | 1125.429601                     | 1.765               | 3.047 | N/A <sup>f</sup>                |       |
| (Bp) <sub>2</sub> PdO                            | 0   | 1125.395807                     | 1125.385340                     | 3.967               | 4.251 | N/A <sup>f</sup>                |       |
| (Bp) <sub>2</sub> PdO                            | 1   | 1125.448729                     | 1125.386787                     | 2.526               | 4.212 | N/A <sup>f</sup>                |       |

<sup>a</sup> MN15/TZ for (CH<sub>3</sub>)<sub>4</sub>M<sup>0,-</sup> and (CH<sub>3</sub>)<sub>4</sub>MO<sup>0,-</sup> species, M=Ni, Pd, Pt; MN15/DZ for (Bp)<sub>2</sub>Pd<sup>0,-</sup> and (Bp)<sub>2</sub>PdO<sup>0,-</sup>.

<sup>b</sup> CCSD(T)/DZ//MN15/TZ.

<sup>c</sup> Energies at the optimized geometry of each species.

<sup>d</sup> Energies at the optimized geometry of the doublet state of the corresponding anion.

<sup>e</sup> The geometry optimization for (CH<sub>3</sub>)<sub>4</sub>NiO [S=0] converged to (CH<sub>3</sub>)<sub>3</sub>Ni(OCH<sub>3</sub>).

<sup>f</sup> Not Available for technical reasons.



**Table S2.** Relative free energy values for the reaction  $\text{CH}_4 + \text{N}_2\text{O} \rightarrow \text{CH}_3\text{OH} + \text{N}_2$  facilitated by  $[\text{M}]\text{O}^-$  at the MN15 level of theory (values used for Figure S7).

| [M]                                   | $(\text{CH}_3)_4\text{Ni}^a$ | $(\text{CH}_3)_4\text{Pd}^a$ | $(\text{CH}_3)_4\text{Pt}^a$ | $(\text{Bp})_2\text{Pd}^b$ |
|---------------------------------------|------------------------------|------------------------------|------------------------------|----------------------------|
| $[\text{M}]\text{O}^- + \text{CH}_4$  | 0.00                         | 0.00                         | 0.00                         | 0.00                       |
| R                                     | 4.77                         | 4.73                         | 4.48                         | 4.15                       |
| TS1R                                  | 22.08                        | 20.77                        | 24.71                        | 20.16                      |
| I1                                    | 6.83                         | 4.92                         | 9.94                         | 3.71                       |
| TS1P                                  | 27.45                        | 24.96                        | 33.72                        | 22.34                      |
| TS2R                                  | 34.78                        | 29.94                        | 33.27                        | 31.16                      |
| I2                                    | 9.17                         | 1.91                         | 1.98                         | 0.51                       |
| TS2P                                  | 24.80                        | 25.28                        | 36.28                        | 20.48                      |
| P                                     | -29.10                       | -26.30                       | -14.28                       | -23.30                     |
| $[\text{M}]^- + \text{CH}_3\text{OH}$ | -27.17                       | -24.78                       | -12.55                       | -23.87                     |
| $[\text{M}]^- + \text{N}_2\text{O}$   | -25.63                       | -21.60                       | -7.97                        | -21.21                     |
| TSO                                   | -12.46                       | -15.18                       | -8.22                        | -12.66                     |
| $[\text{M}]\text{O}^- + \text{N}_2$   | -48.43                       | -48.43                       | -48.43                       | -49.09                     |

<sup>a</sup> MN15/TZ; <sup>b</sup> MN15/DZ.

**Table S3.** Relative electronic energies for the reaction  $(\text{CH}_3)_4\text{FeO}^- + \text{CH}_4 \rightarrow (\text{CH}_3)_4\text{Fe}^- + \text{CH}_3\text{OH}$  at the MN15/TZ level of theory (values used for Figure S6).

| Spin (S)                                            | $1/2$  | $3/2$  | $5/2$  |
|-----------------------------------------------------|--------|--------|--------|
| $(\text{CH}_3)_4\text{FeO}^- + \text{CH}_4$         | 0.00   | 6.37   | 23.89  |
| R                                                   | -5.01  | 0.98   | 19.38  |
| TS1R                                                | 29.70  | 28.57  | 39.84  |
| I1                                                  | 26.16  | 15.08  | 15.16  |
| TS1P                                                | 34.17  | 29.53  | 40.71  |
| TS2R                                                | 34.84  | 32.19  | 39.84  |
| I2                                                  | 5.78   | -0.62  | 15.13  |
| TS2P                                                | 25.05  | 29.67  | 40.71  |
| P                                                   | -13.36 | -29.58 | -15.47 |
| $(\text{CH}_3)_4\text{Fe}^- + \text{CH}_3\text{OH}$ | 4.99   | -15.44 | -0.74  |

**Table S4.** MN15 optimized energies (a.u.) and geometries (Cartesian coordinates in Å) of all intermediates and transition states (see Figure 2 of the manuscript) for the reaction  $\text{CH}_4 + \text{N}_2\text{O} \rightarrow \text{CH}_3\text{OH} + \text{N}_2$  catalyzed by  $[\text{M}]\text{O}^-$ .

|          | $[\text{M}] = (\text{CH}_3)_4\text{Ni}$ | $[\text{M}] = (\text{CH}_3)_4\text{Pd}$ | $[\text{M}] = (\text{CH}_3)_4\text{Pt}$ | $[\text{M}] = (\text{Bp})_2\text{Pd}$ |
|----------|-----------------------------------------|-----------------------------------------|-----------------------------------------|---------------------------------------|
| <b>R</b> | -1783.664412                            | -402.301644                             | -394.398971                             | -1166.001044                          |
| C        | -3.321101 0.062155 0.457264             | C -3.568461 0.212493 0.632305           | C 3.666845 -0.216668 0.632377           | C 0.432923 -3.688959 0.709274         |
| H        | -2.523962 0.061666 -0.286678            | H -2.749259 0.676145 0.083746           | H 2.900359 -0.711849 0.039052           | H 0.721023 -3.271399 -0.262649        |
| H        | -4.293188 0.121024 -0.031397            | H -4.082862 -0.491662 -0.019598         | H 4.160293 0.540670 0.025636            | H 0.523919 -4.781338 0.689996         |
| H        | -3.264602 -0.852783 1.046087            | H -3.163453 -0.327714 1.486866          | H 3.187853 0.266699 1.482373            | H 1.078130 -3.272297 1.492287         |
| H        | -3.193389 0.919934 1.116511             | H -4.270533 0.970133 0.979232           | H 4.401384 -0.939241 0.986725           | H -0.605100 -3.404107 0.916676        |
| O        | -0.573630 0.163775 -1.671796            | O -0.749960 1.284188 -1.224476          | O 0.745054 -1.317729 -1.115020          | O 0.053150 -1.496549 -2.387146        |
| Ni       | 0.362382 0.007627 -0.205687             | Pd 0.309218 0.083977 -0.170366          | Pt -0.227848 -0.078773 -0.129250        | C 0.432402 -0.317400 1.110508         |
| C        | 2.185122 -0.074647 0.317694             | C 2.045247 -0.967625 -0.119283          | C -1.927081 1.077840 -0.150847          | C -0.481333 -0.557205 2.138429        |
| C        | 0.256006 -0.182688 1.691723             | C 0.288975 -0.884803 1.609175           | C -0.210258 0.952075 1.645925           | H -1.549309 -0.584988 1.922928        |
| C        | 0.163759 -1.953156 -0.390866            | C -0.779802 -1.560451 -0.940517         | C 0.918689 1.528771 -0.911433           | C -0.030482 -0.776137 3.444688        |
| H        | 0.955305 -2.476425 0.157024             | H -0.141816 -2.450127 -0.984429         | H 0.288010 2.412778 -1.059118           | H -0.753201 -0.972520 4.238371        |
| H        | 0.170426 -2.258134 -1.438985            | H -1.173277 -1.344366 -1.936430         | H 1.394630 1.274394 -1.862027           | C 1.336903 -0.739177 3.732945         |
| H        | -0.804638 -2.218010 0.047927            | H -1.620443 -1.771036 -0.271223         | H 1.707601 1.797540 -0.200198           | H 1.689253 -0.911859 4.751097         |
| C        | 0.401062 1.984310 -0.112851             | C 1.406936 1.713198 0.613035            | C -1.440572 -1.597543 0.719963          | C 2.250525 -0.479789 2.710383         |
| H        | 1.032306 2.352266 -0.926488             | H 2.234374 1.938274 -0.067501           | H -2.271067 -1.826975 0.043579          | H 3.318953 -0.460783 2.933649         |
| H        | 0.804977 2.326554 0.845836              | H 1.823550 1.455567 1.592981            | H -1.866375 -1.259847 1.671444          | Pd 0.000283 -0.373963 -0.854002       |
| H        | -0.609891 2.377151 -0.249919            | H 0.781410 2.603571 0.706183            | H -0.883832 -2.521734 0.893697          | C 2.035171 -0.044165 -1.004550        |
| H        | 0.548482 -1.168812 2.054460             | H 0.225825 -1.966461 1.491218           | H -0.111299 2.030264 1.498206           | C 2.705121 -0.036223 0.239133         |
| H        | -0.831888 -0.067674 1.754957            | H -0.643813 -0.500397 2.030541          | H 0.681744 0.583540 2.162702            | C 4.089785 0.172370 0.310706          |
| H        | 0.745995 0.598359 2.273822              | H 1.128372 -0.618548 2.251482           | H -1.087121 0.756435 2.268164           | H 4.603171 0.177707 1.275127          |
| H        | 2.583879 -0.076191 -0.702530            | H 2.443390 -0.743753 -1.112380          | H -2.371309 0.890138 -1.132940          | C 4.823338 0.376879 -0.860515         |
| H        | 2.483046 -0.985070 0.837274             | H 1.897415 -2.042424 -0.012440          | H -1.724974 2.147360 -0.053469          | C 4.173695 0.360890 -2.100120         |
| H        | 2.530400 0.806548 0.857908              | H 2.729382 -0.600508 0.646124           | H -2.639924 0.779116 0.621951           | H 4.750039 0.512205 -3.015965         |
|          |                                         |                                         |                                         | H 5.900687 0.545253 -0.808291         |
|          |                                         |                                         |                                         | C 2.790524 0.144122 -2.167466         |
|          |                                         |                                         |                                         | H 2.293508 0.113636 -3.139997         |
|          |                                         |                                         |                                         | C 1.817056 -0.263884 1.394170         |
|          |                                         |                                         |                                         | C -2.028887 -0.692062 -0.644266       |
|          |                                         |                                         |                                         | C -2.733475 -1.878332 -0.876896       |
|          |                                         |                                         |                                         | H -2.194512 -2.760224 -1.233515       |
|          |                                         |                                         |                                         | C -4.117933 -1.945123 -0.666092       |
|          |                                         |                                         |                                         | H -4.656042 -2.878495 -0.847704       |
|          |                                         |                                         |                                         | C -4.817240 -0.814647 -0.228355       |
|          |                                         |                                         |                                         | H -5.895300 -0.866694 -0.064438       |
|          |                                         |                                         |                                         | C -4.132688 0.382623 -0.002714        |
|          |                                         |                                         |                                         | H -4.684985 1.262719 0.335357         |
|          |                                         |                                         |                                         | C -0.510231 1.439779 -0.143913        |
|          |                                         |                                         |                                         | C -1.904190 1.635821 0.004008         |
|          |                                         |                                         |                                         | C -2.383358 2.919738 0.299929         |

|             |                                                                                                                                                                                                                                                                                                                                                                                                                                                                                                                                                                                                                                                                                                                                                                                                                |                                                                                                                                                                                                                                                                                                                                                                                                                                                                                                                                                                                                                                                                                                                                                                                                                 |                                                                                                                                                                                                                                                                                                                                                                                                                                                                                                                                                                                                                                                                                                                                                                                                                |                                                                                                                                                                                                                                                                                                                                                                                                                                                                                                                                                                                                                                                                                                                                                                                                                                                                                                                                                                                                                                                                                                                                                                                                                                                                                                                                             |
|-------------|----------------------------------------------------------------------------------------------------------------------------------------------------------------------------------------------------------------------------------------------------------------------------------------------------------------------------------------------------------------------------------------------------------------------------------------------------------------------------------------------------------------------------------------------------------------------------------------------------------------------------------------------------------------------------------------------------------------------------------------------------------------------------------------------------------------|-----------------------------------------------------------------------------------------------------------------------------------------------------------------------------------------------------------------------------------------------------------------------------------------------------------------------------------------------------------------------------------------------------------------------------------------------------------------------------------------------------------------------------------------------------------------------------------------------------------------------------------------------------------------------------------------------------------------------------------------------------------------------------------------------------------------|----------------------------------------------------------------------------------------------------------------------------------------------------------------------------------------------------------------------------------------------------------------------------------------------------------------------------------------------------------------------------------------------------------------------------------------------------------------------------------------------------------------------------------------------------------------------------------------------------------------------------------------------------------------------------------------------------------------------------------------------------------------------------------------------------------------|---------------------------------------------------------------------------------------------------------------------------------------------------------------------------------------------------------------------------------------------------------------------------------------------------------------------------------------------------------------------------------------------------------------------------------------------------------------------------------------------------------------------------------------------------------------------------------------------------------------------------------------------------------------------------------------------------------------------------------------------------------------------------------------------------------------------------------------------------------------------------------------------------------------------------------------------------------------------------------------------------------------------------------------------------------------------------------------------------------------------------------------------------------------------------------------------------------------------------------------------------------------------------------------------------------------------------------------------|
|             |                                                                                                                                                                                                                                                                                                                                                                                                                                                                                                                                                                                                                                                                                                                                                                                                                |                                                                                                                                                                                                                                                                                                                                                                                                                                                                                                                                                                                                                                                                                                                                                                                                                 |                                                                                                                                                                                                                                                                                                                                                                                                                                                                                                                                                                                                                                                                                                                                                                                                                | H -3.458340 3.082722 0.400501<br>C -1.506304 3.995185 0.450251<br>C -0.131223 3.791661 0.305241<br>H 0.562315 4.626309 0.422994<br>H -1.893715 4.989824 0.676988<br>C 0.365643 2.515372 0.015945<br>H 1.440387 2.359296 -0.080181<br>C -2.747262 0.443618 -0.207719                                                                                                                                                                                                                                                                                                                                                                                                                                                                                                                                                                                                                                                                                                                                                                                                                                                                                                                                                                                                                                                                         |
| <b>TS1R</b> | -1783.630372<br>C -3.474888 0.065700 -0.000078<br>H -2.191120 0.580970 0.000121<br>H -4.065481 0.976314 0.000114<br>H -3.558637 -0.520709 -0.907846<br>H -3.558820 -0.521230 0.907336<br>O -1.177341 1.086264 0.000115<br>Ni 0.319268 0.058025 0.000027<br>C 1.591087 -0.671763 -1.196262<br>C 1.591407 -0.671805 1.195963<br>C -0.687573 -1.636638 0.000172<br>H -0.046089 -2.524555 0.000296<br>H -1.327260 -1.651015 -0.887877<br>H -1.327338 -1.650819 0.888165<br>C 1.260132 1.793684 0.000013<br>H 0.938569 2.344541 -0.887607<br>H 2.351071 1.689250 -0.000536<br>H 0.939448 2.343936 0.888333<br>H 1.685180 -1.756996 1.159974<br>H 1.064146 -0.370730 2.108274<br>H 2.573202 -0.200664 1.160382<br>H 1.063960 -0.369990 -2.108418<br>H 1.684282 -1.757018 -1.160728<br>H 2.573133 -0.201159 -1.160519 | -402.272698<br>C -3.592110 0.048304 -0.013659<br>H -2.381583 0.668592 0.008828<br>H -3.687440 -0.344712 -1.019587<br>H -3.537380 -0.720737 0.747578<br>H -4.280999 0.855623 0.213589<br>O -1.372494 1.208382 0.033379<br>Pd 0.249314 0.063537 -0.001907<br>C 1.665038 -0.700940 -1.219730<br>C 1.565327 -0.807392 1.251865<br>C -0.812194 -1.762838 -0.053763<br>H -0.139046 -2.614412 -0.208784<br>H -1.555981 -1.749319 -0.856476<br>H -1.340212 -1.906006 0.895580<br>C 1.331773 1.871591 0.019643<br>H 1.364679 2.265598 -1.001727<br>H 2.360484 1.728230 0.371106<br>H 0.822104 2.600452 0.654029<br>H 1.575891 -1.892031 1.147547<br>H 1.140866 -0.525634 2.218476<br>H 2.573265 -0.404736 1.156176<br>H 1.235229 -0.479098 -2.199858<br>H 1.795304 -1.777239 -1.106322<br>H 2.619302 -0.186687 -1.105620 | -394.364064<br>C -3.665056 0.055053 -0.012221<br>H -2.410137 0.651026 0.003858<br>H -3.769325 -0.334957 -1.017845<br>H -3.621268 -0.709604 0.753392<br>H -4.317735 0.890921 0.216163<br>O -1.408192 1.178004 0.027977<br>Pt 0.183364 0.051658 0.000929<br>C 1.598257 -0.732080 -1.235738<br>C 1.519663 -0.841041 1.247826<br>C -0.893055 -1.767022 -0.048931<br>H -0.226800 -2.624461 -0.210433<br>H -1.643806 -1.769202 -0.847520<br>H -1.423769 -1.933968 0.896816<br>C 1.294582 1.849802 0.021294<br>H 1.393456 2.236795 -1.000164<br>H 2.307380 1.693359 0.414662<br>H 0.800409 2.621042 0.619365<br>H 1.535355 -1.927360 1.129161<br>H 1.159814 -0.597466 2.251810<br>H 2.535478 -0.454693 1.133660<br>H 1.224473 -0.530921 -2.244172<br>H 1.726358 -1.811106 -1.115771<br>H 2.566947 -0.241040 -1.112638 | -1165.970354<br>C -1.656079 -0.953366 1.402119<br>C -0.306244 -0.570904 1.225685<br>C 0.672481 -1.001402 2.121841<br>H 1.713567 -0.718207 1.971764<br>C 0.313759 -1.800522 3.214093<br>H 1.083825 -2.130165 3.913747<br>C -1.017844 -2.178847 3.405447<br>H -1.294710 -2.801639 4.257583<br>C -1.992946 -1.756272 2.501031<br>H -3.034537 -2.045542 2.654538<br>H 4.824991 -0.830746 -0.643819<br>C 4.217244 -0.004877 -0.266111<br>C 2.821375 -0.024630 -0.396995<br>C 4.841460 1.081127 0.353538<br>H 5.927754 1.097505 0.462543<br>C 2.032239 1.042148 0.088348<br>C 4.071039 2.149037 0.828528<br>C 2.676291 2.128839 0.688679<br>H 4.562726 3.001063 1.304629<br>H 2.073929 2.970844 1.037979<br>H -4.410477 -1.462018 1.029434<br>C -3.955958 -0.786861 0.300513<br>C -2.600018 -0.442193 0.393914<br>C -4.732060 -0.272910 -0.740946<br>H -5.786921 -0.541436 -0.821861<br>C -2.003425 0.440682 -0.533492<br>C -4.149475 0.581587 -1.684966<br>C -2.797686 0.933309 -1.575988<br>H -4.754394 0.976024 -2.504732<br>H -2.360861 1.617572 -2.308372<br>H -0.273803 -3.771160 -2.682694<br>C 0.377477 -3.025541 -2.222679<br>C -0.186483 -1.926271 -1.562573<br>H -1.271241 -1.830979 -1.508248<br>C 1.765254 -3.170419 -2.286030<br>H 2.206451 -4.026868 -2.798859<br>C 0.629511 -0.957378 -0.972927<br>C 2.586744 -2.211814 -1.689735 |

|    |                                                                                                                                                                                                                                                                                                                                                                                                                                                                                                                                                                                                                                                                                                                                                                                                              |                                                                                                                                                                                                                                                                                                                                                                                                                                                                                                                                                                                                                                                                                                                                                                                                              |                                                                                                                                                                                                                                                                                                                                                                                                                                                                                                                                                                                                                                                                                                                                                                                                             |                                                                                                                                                                                                                                                                                                                                                                                                                                                                                                                                                                                                                                                                                                                                                                                                                                                                                                                                                                                                                                                                                                                                                                                                                                                                                                  |  |  |  |  |  |  |                                                                                                                                                                                                                                                                                                              |
|----|--------------------------------------------------------------------------------------------------------------------------------------------------------------------------------------------------------------------------------------------------------------------------------------------------------------------------------------------------------------------------------------------------------------------------------------------------------------------------------------------------------------------------------------------------------------------------------------------------------------------------------------------------------------------------------------------------------------------------------------------------------------------------------------------------------------|--------------------------------------------------------------------------------------------------------------------------------------------------------------------------------------------------------------------------------------------------------------------------------------------------------------------------------------------------------------------------------------------------------------------------------------------------------------------------------------------------------------------------------------------------------------------------------------------------------------------------------------------------------------------------------------------------------------------------------------------------------------------------------------------------------------|-------------------------------------------------------------------------------------------------------------------------------------------------------------------------------------------------------------------------------------------------------------------------------------------------------------------------------------------------------------------------------------------------------------------------------------------------------------------------------------------------------------------------------------------------------------------------------------------------------------------------------------------------------------------------------------------------------------------------------------------------------------------------------------------------------------|--------------------------------------------------------------------------------------------------------------------------------------------------------------------------------------------------------------------------------------------------------------------------------------------------------------------------------------------------------------------------------------------------------------------------------------------------------------------------------------------------------------------------------------------------------------------------------------------------------------------------------------------------------------------------------------------------------------------------------------------------------------------------------------------------------------------------------------------------------------------------------------------------------------------------------------------------------------------------------------------------------------------------------------------------------------------------------------------------------------------------------------------------------------------------------------------------------------------------------------------------------------------------------------------------|--|--|--|--|--|--|--------------------------------------------------------------------------------------------------------------------------------------------------------------------------------------------------------------------------------------------------------------------------------------------------------------|
|    |                                                                                                                                                                                                                                                                                                                                                                                                                                                                                                                                                                                                                                                                                                                                                                                                              |                                                                                                                                                                                                                                                                                                                                                                                                                                                                                                                                                                                                                                                                                                                                                                                                              |                                                                                                                                                                                                                                                                                                                                                                                                                                                                                                                                                                                                                                                                                                                                                                                                             |                                                                                                                                                                                                                                                                                                                                                                                                                                                                                                                                                                                                                                                                                                                                                                                                                                                                                                                                                                                                                                                                                                                                                                                                                                                                                                  |  |  |  |  |  |  | C 2.037702 -1.103998 -1.029132<br>H 3.671651 -2.320538 -1.748577<br>O -0.136775 2.751728 -0.211848<br>Pd 0.001743 0.793369 -0.194280<br>C -2.420368 3.749930 -0.030857<br>H -2.185161 4.680955 0.490575<br>H -2.818485 3.890727 -1.037980<br>H -2.982240 3.026783 0.563471<br>H -1.221961 3.198294 -0.187275 |
| 11 | -1783.655992<br>C -3.280724 0.079384 0.659239<br>H -1.146305 -0.285159 -1.968702<br>H -3.110835 -0.816593 1.233759<br>H -2.518076 0.427695 -0.024958<br>H -4.209068 0.612612 0.783133<br>O -0.801435 0.520687 -1.570241<br>Ni 0.327167 0.026804 -0.172362<br>C 2.143595 -0.374251 0.122825<br>C 0.362279 -0.253325 1.699004<br>C -0.103657 -1.876304 -0.502039<br>H 0.424471 -2.585069 0.147690<br>H 0.134399 -2.117948 -1.546228<br>H -1.184391 -2.012322 -0.358632<br>C 0.637934 1.943557 0.087785<br>H 0.977253 2.341142 -0.872943<br>H 1.354033 2.198739 0.877702<br>H -0.338329 2.384076 0.316941<br>H 0.582610 -1.278983 1.995747<br>H -0.699154 -0.031539 1.863703<br>H 0.976742 0.448180 2.262932<br>H 2.434239 -0.293609 -0.931048<br>H 2.333754 -1.382778 0.489251<br>H 2.682889 0.361172 0.718826 | -402.298101<br>C -3.402641 0.097865 0.836056<br>H -1.439087 0.379337 -1.918746<br>H -3.224473 -0.908430 1.177677<br>H -2.672981 0.583770 0.203202<br>H -4.304230 0.604296 1.139310<br>O -0.979310 1.048268 -1.399737<br>Pd 0.283700 0.054655 -0.172257<br>C 2.129818 -0.709878 0.099495<br>C 0.235430 -0.683824 1.696194<br>C -0.479936 -1.787333 -0.881352<br>H 0.078647 -2.652008 -0.502063<br>H -0.454784 -1.815043 -1.977886<br>H -1.526219 -1.890456 -0.566183<br>C 1.012292 1.905569 0.490613<br>H 1.789288 2.244148 -0.204424<br>H 1.446547 1.856609 1.496623<br>H 0.194676 2.630719 0.473799<br>H 0.302624 -1.771416 1.703310<br>H -0.760299 -0.361540 2.012087<br>H 0.993981 -0.248150 2.345816<br>H 2.569535 -0.548798 -0.888817<br>H 2.121916 -1.775600 0.331050<br>H 2.699348 -0.162099 0.850924 | -394.387091<br>C -3.509343 0.086797 0.845137<br>H -1.428749 0.545289 -1.896544<br>H -3.319165 -0.933620 1.132510<br>H -2.762945 0.625437 0.281363<br>H -4.434248 0.556482 1.136091<br>O -0.950598 1.153574 -1.321874<br>Pt 0.212567 0.050189 -0.124347<br>C 2.050943 -0.783953 0.104925<br>C 0.138682 -0.844178 1.692186<br>C -0.611009 -1.713306 -0.959351<br>H 0.022456 -2.592429 -0.779338<br>H -0.757409 -1.633551 -2.046088<br>H -1.594428 -1.928924 -0.518469<br>C 0.995192 1.832339 0.669654<br>H 1.867976 2.157179 0.088183<br>H 1.324804 1.715914 1.711243<br>H 0.252973 2.636001 0.624728<br>H 0.220144 -1.932090 1.621997<br>H -0.852336 -0.583488 2.078247<br>H 0.897840 -0.470865 2.384324<br>H 2.568461 -0.573279 -0.836378<br>H 2.016694 -1.867141 0.252648<br>H 2.615670 -0.330433 0.924220 | -1165.998762<br>C 1.704672 0.704845 1.359796<br>C 0.349790 0.332618 1.197115<br>C -0.567621 0.554464 2.225575<br>H -1.613273 0.279838 2.090874<br>C -0.145264 1.134308 3.427308<br>H -0.868952 1.301557 4.226997<br>C 1.191586 1.503244 3.601069<br>H 1.519355 1.955964 4.538197<br>C 2.106909 1.286746 2.570696<br>H 3.153703 1.562246 2.712230<br>H -4.932616 0.716341 -0.180784<br>C -4.266880 -0.139009 -0.040931<br>C -2.887127 -0.016448 -0.256743<br>C -4.799031 -1.369420 0.354396<br>H -5.872076 -1.469462 0.529800<br>C -2.023242 -1.120408 -0.081515<br>C -3.954667 -2.474777 0.515809<br>C -2.576801 -2.349447 0.289628<br>H -4.377094 -3.438115 0.812427<br>H -1.919318 -3.216926 0.384617<br>H 4.450122 1.241508 0.978612<br>C 3.958542 0.712543 0.158975<br>C 2.594885 0.398797 0.225910<br>C 4.704973 0.335477 -0.961856<br>H 5.767788 0.577369 -1.017919<br>C 1.949025 -0.295902 -0.823364<br>C 4.083917 -0.351597 -2.010546<br>C 2.717606 -0.662143 -1.935349<br>H 4.666403 -0.645845 -2.886660<br>H 2.249676 -1.204088 -2.762796<br>H -0.081532 4.262392 -1.889048<br>C -0.675082 3.409169 -1.555246<br>C -0.033899 2.218340 -1.190516<br>H 1.053859 2.154178 -1.231919<br>C -2.066846 3.507475 -1.483326<br>H -2.567366 4.435659 -1.764550<br>C -0.779360 1.115917 -0.767370 |  |  |  |  |  |  |                                                                                                                                                                                                                                                                                                              |

|             |                                                                                                                                                                                                                                                                                                                                                                                                                                                                                                                                                                                                                                                                                                                                                                                                                |                                                                                                                                                                                                                                                                                                                                                                                                                                                                                                                                                                                                                                                                                                                                                                                                              |                                                                                                                                                                                                                                                                                                                                                                                                                                                                                                                                                                                                                                                                                                                                                                                                              |                                                                                                                                                                                                                                                                                                                                                                                                                                                                                                                                                                                                                                                                                                                                                                                                                                                                                                                                                                                                                                                                                                                                                                                                                                                                 |
|-------------|----------------------------------------------------------------------------------------------------------------------------------------------------------------------------------------------------------------------------------------------------------------------------------------------------------------------------------------------------------------------------------------------------------------------------------------------------------------------------------------------------------------------------------------------------------------------------------------------------------------------------------------------------------------------------------------------------------------------------------------------------------------------------------------------------------------|--------------------------------------------------------------------------------------------------------------------------------------------------------------------------------------------------------------------------------------------------------------------------------------------------------------------------------------------------------------------------------------------------------------------------------------------------------------------------------------------------------------------------------------------------------------------------------------------------------------------------------------------------------------------------------------------------------------------------------------------------------------------------------------------------------------|--------------------------------------------------------------------------------------------------------------------------------------------------------------------------------------------------------------------------------------------------------------------------------------------------------------------------------------------------------------------------------------------------------------------------------------------------------------------------------------------------------------------------------------------------------------------------------------------------------------------------------------------------------------------------------------------------------------------------------------------------------------------------------------------------------------|-----------------------------------------------------------------------------------------------------------------------------------------------------------------------------------------------------------------------------------------------------------------------------------------------------------------------------------------------------------------------------------------------------------------------------------------------------------------------------------------------------------------------------------------------------------------------------------------------------------------------------------------------------------------------------------------------------------------------------------------------------------------------------------------------------------------------------------------------------------------------------------------------------------------------------------------------------------------------------------------------------------------------------------------------------------------------------------------------------------------------------------------------------------------------------------------------------------------------------------------------------------------|
|             |                                                                                                                                                                                                                                                                                                                                                                                                                                                                                                                                                                                                                                                                                                                                                                                                                |                                                                                                                                                                                                                                                                                                                                                                                                                                                                                                                                                                                                                                                                                                                                                                                                              |                                                                                                                                                                                                                                                                                                                                                                                                                                                                                                                                                                                                                                                                                                                                                                                                              | C -2.816096 2.411282 -1.050588<br>C -2.190251 1.210674 -0.688034<br>H -3.904673 2.485463 -1.006142<br>O 0.202578 -2.607510 -1.017121<br>Pd -0.038144 -0.724401 -0.448533<br>C 3.201464 -2.935129 0.895610<br>H 3.573037 -3.838216 1.369212<br>H 3.895658 -2.240127 0.432202<br>H 2.134983 -2.729665 0.874513<br>H 1.119102 -2.737244 -1.299391                                                                                                                                                                                                                                                                                                                                                                                                                                                                                                                                                                                                                                                                                                                                                                                                                                                                                                                  |
| <b>TS1P</b> | -1783.627895<br>H -2.600177 -1.040547 0.826133<br>H -3.773559 -0.025330 -0.160373<br>C -2.890711 -0.069119 0.459086<br>O -1.498653 0.114816 -0.825806<br>H -2.710424 0.767831 1.119200<br>H -1.613313 1.051700 -1.033963<br>Ni 0.309722 0.002246 -0.192407<br>C 2.192331 -0.117304 -0.294069<br>C 0.181000 -1.952172 -0.342545<br>H 0.444600 -2.211944 -1.376123<br>H -0.853300 -2.267259 -0.167990<br>H 0.848456 -2.493699 0.335844<br>H 2.712581 0.668859 0.254652<br>H 2.339575 0.032074 -1.371280<br>H 2.574148 -1.096550 -0.001986<br>C 0.626147 -0.065128 1.713423<br>H -0.412628 -0.116370 2.055139<br>H 1.109477 0.847281 2.063157<br>H 1.180086 -0.950352 2.023630<br>C 0.383571 1.988292 -0.200837<br>H 1.303631 2.397243 0.231021<br>H -0.460993 2.353783 0.403145<br>H 0.274827 2.394452 -1.216720 | -402.270986<br>H -2.672439 -1.077560 0.886995<br>H -3.950273 -0.064965 0.037461<br>C -3.009133 -0.104628 0.565158<br>O -1.734888 0.106337 -0.825373<br>H -2.781668 0.722848 1.222787<br>H -1.850073 1.045315 -1.028173<br>Pd 0.267519 0.004839 -0.211720<br>C 2.272008 -0.114310 -0.135972<br>C 0.179959 -2.092275 -0.297050<br>H 0.601384 -2.437461 -1.248799<br>H -0.863255 -2.421743 -0.247523<br>H 0.745906 -2.562206 0.515648<br>H 2.709511 0.702302 0.441351<br>H 2.589017 -0.029579 -1.179885<br>H 2.601758 -1.073245 0.267745<br>C 0.537727 -0.033550 1.817596<br>H -0.487804 -0.085193 2.187473<br>H 1.028427 0.885090 2.135320<br>H 1.106485 -0.912800 2.115018<br>C 0.324567 2.124889 -0.168941<br>H 1.219477 2.496670 0.343704<br>H -0.553897 2.492213 0.381116<br>H 0.299906 2.566271 -1.172901 | -394.354034<br>H -2.768545 -1.048163 0.880179<br>H -4.017049 -0.017147 0.015629<br>C -3.084620 -0.067719 0.558949<br>O -1.795807 0.158308 -0.762504<br>H -2.881003 0.742412 1.245726<br>H -1.898887 1.098025 -0.973791<br>Pt 0.207855 0.006311 -0.162671<br>C 2.220733 -0.145781 -0.014482<br>C 0.061385 -2.087546 -0.298738<br>H 0.469453 -2.449236 -1.251539<br>H -0.983376 -2.419436 -0.250394<br>H 0.617122 -2.593486 0.502491<br>H 2.651580 0.659384 0.590426<br>H 2.642114 -0.075253 -1.023191<br>H 2.527370 -1.104576 0.416762<br>C 0.386487 -0.110604 1.873155<br>H -0.633819 -0.116868 2.264851<br>H 0.929559 0.756889 2.252691<br>H 0.900828 -1.029168 2.161160<br>C 0.335797 2.119497 -0.090655<br>H 1.040988 2.451202 0.683783<br>H -0.635418 2.584558 0.143889<br>H 0.674164 2.555047 -1.039675 | -1165.971902<br>C 1.820062 0.194755 1.510370<br>C 0.449923 -0.053734 1.275213<br>C -0.463346 -0.039874 2.328051<br>H -1.523939 -0.208744 2.136132<br>C -0.017300 0.197652 3.635544<br>H -0.734145 0.203045 4.459003<br>C 1.337528 0.433958 3.883246<br>H 1.683968 0.620471 4.901227<br>C 2.248070 0.433603 2.824523<br>H 3.306348 0.614422 3.024524<br>H -4.783940 1.144601 -0.081682<br>C -4.190574 0.227346 -0.106232<br>C -2.807313 0.280424 -0.323719<br>C -4.823320 -1.003213 0.094372<br>H -5.900387 -1.044020 2.674702<br>C -2.025586 -0.902272 -0.365767<br>C -4.066967 -2.179341 0.086095<br>C -2.683972 -2.119147 -0.140668<br>H -4.554472 -3.141671 0.259335<br>H -2.116093 -3.056981 -0.123344<br>H 4.589727 0.653959 1.246238<br>C 4.070631 0.397817 0.319542<br>C 2.690690 0.150677 0.319648<br>C 4.793623 0.313216 -0.873104<br>H 5.867417 0.509953 -0.877735<br>C 2.008183 -0.185483 -0.873208<br>C 4.136807 -0.033978 -2.058887<br>C 2.758122 -0.289953 -2.051019<br>H 4.703535 -0.111459 -2.989985<br>H 2.262337 -0.583695 -2.979467<br>H 0.312707 4.608105 -0.919428<br>C -0.344130 3.743640 -0.803307<br>C 0.206643 2.458483 -0.733139<br>H 1.288566 2.332037 -0.786029<br>C -1.728493 3.921912 -0.719578<br>H -2.158452 4.923703 -0.773175 |

|             |                                                                                                                                                                                                                                                                                                                                                                                                                                                                                                                                                                                                                                                                                                                                                                                                                  |                                                                                                                                                                                                                                                                                                                                                                                                                                                                                                                                                                                                                                                                                                                                                                                                                   |                                                                                                                                                                                                                                                                                                                                                                                                                                                                                                                                                                                                                                                                                                                                                                                                                |                                                                                                                                                                                                                                                                                                                                                                                                                                                                                                                                                                                                                                                                                                                                                                                                                                                                                                                                                                                                                                                                                                                                                                                                                                            |
|-------------|------------------------------------------------------------------------------------------------------------------------------------------------------------------------------------------------------------------------------------------------------------------------------------------------------------------------------------------------------------------------------------------------------------------------------------------------------------------------------------------------------------------------------------------------------------------------------------------------------------------------------------------------------------------------------------------------------------------------------------------------------------------------------------------------------------------|-------------------------------------------------------------------------------------------------------------------------------------------------------------------------------------------------------------------------------------------------------------------------------------------------------------------------------------------------------------------------------------------------------------------------------------------------------------------------------------------------------------------------------------------------------------------------------------------------------------------------------------------------------------------------------------------------------------------------------------------------------------------------------------------------------------------|----------------------------------------------------------------------------------------------------------------------------------------------------------------------------------------------------------------------------------------------------------------------------------------------------------------------------------------------------------------------------------------------------------------------------------------------------------------------------------------------------------------------------------------------------------------------------------------------------------------------------------------------------------------------------------------------------------------------------------------------------------------------------------------------------------------|--------------------------------------------------------------------------------------------------------------------------------------------------------------------------------------------------------------------------------------------------------------------------------------------------------------------------------------------------------------------------------------------------------------------------------------------------------------------------------------------------------------------------------------------------------------------------------------------------------------------------------------------------------------------------------------------------------------------------------------------------------------------------------------------------------------------------------------------------------------------------------------------------------------------------------------------------------------------------------------------------------------------------------------------------------------------------------------------------------------------------------------------------------------------------------------------------------------------------------------------|
|             |                                                                                                                                                                                                                                                                                                                                                                                                                                                                                                                                                                                                                                                                                                                                                                                                                  |                                                                                                                                                                                                                                                                                                                                                                                                                                                                                                                                                                                                                                                                                                                                                                                                                   |                                                                                                                                                                                                                                                                                                                                                                                                                                                                                                                                                                                                                                                                                                                                                                                                                | C -0.618285 1.336055 -0.597355<br>C -2.558254 2.810777 -0.560781<br>C -2.021082 1.517153 -0.493991<br>H -3.639099 2.952263 -0.492719<br>Pd -0.006565 -0.560575 -0.641063<br>O 0.354564 -2.441774 -1.344857<br>H 2.018364 -2.903053 0.217860<br>C 1.126034 -3.521498 0.176357<br>H 0.347487 -3.330834 0.912218<br>H 1.220797 -4.527655 -0.224049<br>H -0.511413 -2.867651 -1.441816                                                                                                                                                                                                                                                                                                                                                                                                                                                                                                                                                                                                                                                                                                                                                                                                                                                         |
| <b>TSZR</b> | -1783.615430<br>C 2.082042 -0.119709 0.678894<br>H 1.572857 -0.162206 -0.655147<br>H 2.648868 -1.057222 0.664913<br>H 2.766686 0.729536 0.578433<br>H 1.601063 -0.044462 1.653444<br>O 0.899548 -0.210491 -1.657965<br>Ni -0.061987 0.002224 -0.046738<br>C -1.790898 0.017125 -0.861736<br>C -1.022165 0.268677 1.597942<br>C 0.185802 1.981539 -0.106766<br>H -0.776062 2.482178 -0.232338<br>H 0.864254 2.257137 -0.915849<br>H 0.626652 2.258621 0.854184<br>C -0.184163 -1.966994 0.213517<br>H -1.224420 -2.296876 0.202021<br>H 0.257016 -2.156547 1.195317<br>H 0.387376 -2.489722 -0.555099<br>H -0.279408 0.452249 2.379646<br>H -1.609827 -0.615431 1.855005<br>H -1.681899 1.136320 1.527931<br>H -1.560007 -0.364787 -1.856420<br>H -2.174880 1.036220 -0.908913<br>H -2.502730 -0.627191 -0.345860 | -402.259842<br>C 2.162665 -0.127680 0.850493<br>H 1.803016 -0.166274 -0.555003<br>H 2.738974 -1.057311 0.901776<br>H 2.840512 0.731910 0.834570<br>H 1.585098 -0.060593 1.776935<br>O 1.246810 -0.190856 -1.631035<br>Pd -0.043311 -0.000651 -0.037105<br>C -1.807346 0.112291 -1.017208<br>C -1.187667 0.176947 1.631875<br>C 0.131277 2.112313 -0.041934<br>H -0.859289 2.568911 -0.108047<br>H 0.753163 2.457058 -0.870226<br>H 0.599211 2.395734 0.905018<br>C -0.296771 -2.097603 0.115973<br>H -1.282551 -2.319383 0.531137<br>H 0.477097 -2.504320 0.772682<br>H -0.206687 -2.551446 -0.873093<br>H -1.495731 1.214719 1.773426<br>H -0.586472 -0.146382 2.485934<br>H -2.073238 -0.457139 1.563263<br>H -1.521284 0.200925 -2.066713<br>H -2.375482 0.986805 -0.698393<br>H -2.391462 -0.794025 -0.853350 | -394.353657<br>C 2.202053 -0.173684 0.768372<br>H 1.823283 -0.123437 -0.587534<br>H 2.760518 -1.114097 0.759217<br>H 2.887241 0.678357 0.793076<br>H 1.638751 -0.151244 1.707002<br>O 1.159242 -0.059014 -1.648110<br>Pt -0.025168 0.004765 -0.037399<br>C -1.809100 0.153495 -0.993470<br>C -1.091091 0.026156 1.724491<br>C 0.074233 2.118310 0.126605<br>H -0.925579 2.527804 0.295828<br>H 0.498316 2.578187 -0.769211<br>H 0.702296 2.380452 0.984734<br>C -0.284363 -2.098791 0.050529<br>H -1.271152 -2.331630 0.460463<br>H 0.475229 -2.543707 0.702105<br>H -0.199366 -2.549027 -0.941583<br>H -1.151143 1.031037 2.153524<br>H -0.615658 -0.633691 2.459082<br>H -2.112160 -0.339106 1.572029<br>H -1.585525 0.226187 -2.061264<br>H -2.360106 1.041471 -0.674226<br>H -2.426197 -0.730045 -0.810443 | -1165.955696<br>C 0.436547 -2.135628 -2.116350<br>H 0.077832 -0.846805 -2.633462<br>H -0.298585 -2.651634 -2.754023<br>H 1.445900 -2.254963 -2.531988<br>H 0.413663 -2.645695 -1.141427<br>O -0.200694 0.337229 -2.818590<br>C 0.437469 -0.975264 0.995553<br>C -0.477816 -1.540823 1.888352<br>H -1.538591 -1.569373 1.638893<br>C -0.045648 -2.075383 3.109307<br>H -0.773896 -2.515744 3.793110<br>C 1.307883 -2.042750 3.453400<br>H 1.643997 -2.458424 4.404954<br>C 2.228516 -1.471509 2.573711<br>H 3.286198 -1.444489 2.843565<br>Pd 0.012796 -0.245812 -0.824368<br>C 2.038939 0.128396 -0.815296<br>C 2.699464 -0.308483 0.353539<br>C 4.082036 -0.125063 0.501004<br>H 4.592092 -0.463366 1.405872<br>C 4.818044 0.495673 -0.511001<br>C 4.172387 0.929349 -1.674240<br>H 4.747424 1.414404 -2.466386<br>H 5.893623 0.640966 -0.394336<br>C 2.791319 0.741958 -1.823539<br>H 2.294839 1.084086 -2.735025<br>C 1.808618 -0.934147 1.348685<br>C -2.029179 -0.588008 -0.653652<br>C -2.758108 -1.701788 -1.080764<br>H -2.250049 -2.522528 -1.592846<br>C -4.139384 -1.794456 -0.855535<br>H -4.691431 -2.674937 -1.192334<br>C -4.811641 -0.758922 -0.199731<br>H -5.886730 -0.827131 -0.023318<br>C -4.100857 0.364183 0.231407 |

|           |                                                                                                                                                                                                                                                                                                                                                                                                                                                                                                                                                                                                                                                                                                                                                                                                                  |                                                                                                                                                                                                                                                                                                                                                                                                                                                                                                                                                                                                                                                                                                                                                                                                             |                                                                                                                                                                                                                                                                                                                                                                                                                                                                                                                                                                                                                                                                                                                                                                                                              |                                                                                                                                                                                                                                                                                                                                                                                                                                                                                                                                                                                                                                                                                                                                                                                                                                                                                                                                                                                                                                                                                                                                                                                            |
|-----------|------------------------------------------------------------------------------------------------------------------------------------------------------------------------------------------------------------------------------------------------------------------------------------------------------------------------------------------------------------------------------------------------------------------------------------------------------------------------------------------------------------------------------------------------------------------------------------------------------------------------------------------------------------------------------------------------------------------------------------------------------------------------------------------------------------------|-------------------------------------------------------------------------------------------------------------------------------------------------------------------------------------------------------------------------------------------------------------------------------------------------------------------------------------------------------------------------------------------------------------------------------------------------------------------------------------------------------------------------------------------------------------------------------------------------------------------------------------------------------------------------------------------------------------------------------------------------------------------------------------------------------------|--------------------------------------------------------------------------------------------------------------------------------------------------------------------------------------------------------------------------------------------------------------------------------------------------------------------------------------------------------------------------------------------------------------------------------------------------------------------------------------------------------------------------------------------------------------------------------------------------------------------------------------------------------------------------------------------------------------------------------------------------------------------------------------------------------------|--------------------------------------------------------------------------------------------------------------------------------------------------------------------------------------------------------------------------------------------------------------------------------------------------------------------------------------------------------------------------------------------------------------------------------------------------------------------------------------------------------------------------------------------------------------------------------------------------------------------------------------------------------------------------------------------------------------------------------------------------------------------------------------------------------------------------------------------------------------------------------------------------------------------------------------------------------------------------------------------------------------------------------------------------------------------------------------------------------------------------------------------------------------------------------------------|
|           |                                                                                                                                                                                                                                                                                                                                                                                                                                                                                                                                                                                                                                                                                                                                                                                                                  |                                                                                                                                                                                                                                                                                                                                                                                                                                                                                                                                                                                                                                                                                                                                                                                                             |                                                                                                                                                                                                                                                                                                                                                                                                                                                                                                                                                                                                                                                                                                                                                                                                              | H -4.630916 1.169233 0.745334<br>C -0.480820 1.425487 0.183116<br>C -1.863044 1.573401 0.443775<br>C -2.326412 2.737428 1.073619<br>H -3.393460 2.861091 1.269758<br>C -1.437369 3.744854 1.451885<br>C -0.071289 3.590148 1.203855<br>H 0.631156 4.371503 1.500763<br>H -1.808673 4.647363 1.940657<br>C 0.404470 2.431742 0.575179<br>H 1.473810 2.321734 0.392247<br>C -2.719332 0.451976 0.010331                                                                                                                                                                                                                                                                                                                                                                                                                                                                                                                                                                                                                                                                                                                                                                                      |
| <b>12</b> | -1783.661386<br>C 1.557224 0.665959 -1.074378<br>H 2.191583 1.346998 -0.508744<br>H 2.124710 -0.183341 -1.454278<br>H 1.051536 1.191455 -1.887336<br>O 0.099417 -1.770573 -0.721894<br>H 1.029851 -2.016248 -0.755436<br>Ni -0.003061 -0.017996 -0.024142<br>C -0.204843 1.819143 0.553868<br>C -1.469760 -0.542510 1.234923<br>H -1.008723 -0.337596 2.202302<br>H -1.589943 -1.606891 1.046246<br>H -2.403419 0.005869 1.130397<br>H -0.248690 2.461305 -0.332115<br>H 0.648146 2.130650 1.163969<br>H -1.126012 1.959442 1.126553<br>C 1.517508 -0.450542 1.226725<br>H 1.039607 -1.178784 1.882034<br>H 1.824029 0.445342 1.766437<br>H 2.368705 -0.901393 0.715972<br>C -1.594386 0.254417 -1.177931<br>H -2.250728 1.056009 -0.842860<br>H -2.110452 -0.697573 -1.273106<br>H -1.084287 0.514420 -2.108159 | -402.308596<br>C -1.693446 0.072133 -1.287115<br>H -0.858118 -2.362466 -0.272739<br>H -1.259910 -0.061730 -2.280590<br>H -2.389137 -0.736655 -1.058446<br>H -2.186386 1.040222 -1.199641<br>O 0.046450 -2.068409 -0.120548<br>Pd 0.000933 -0.023472 -0.012983<br>C 1.612736 -0.105452 1.361822<br>C 0.034024 2.019390 0.015572<br>C -1.578456 0.031446 1.411306<br>H -1.094083 0.365526 2.328423<br>H -1.936517 -0.993960 1.497790<br>H -2.374361 0.712221 1.116185<br>C 1.679533 0.084904 -1.302244<br>H 2.285812 0.965626 -1.101426<br>H 1.194491 0.146481 -2.278036<br>H 2.233245 -0.843094 -1.184931<br>H -0.864313 2.421409 0.492773<br>H 0.070557 2.381738 -1.016876<br>H 0.916344 2.389879 0.545143<br>H 1.995951 -1.121020 1.282808<br>H 1.142183 0.069860 2.330500<br>H 2.383382 0.638416 1.164624 | -394.409174<br>C -0.001481 -2.063665 0.342862<br>H -0.426512 -2.244515 1.328978<br>H -0.633404 -2.496332 -0.434972<br>H 1.017230 -2.445990 0.282056<br>O -0.871465 0.000134 -1.874801<br>H -1.825034 0.001191 -1.729703<br>Pt -0.004651 0.000006 -0.062679<br>C 1.012130 -0.001149 1.741353<br>C 0.006234 2.063992 0.340809<br>H -0.418783 2.247602 1.326428<br>H -0.623533 2.498199 -0.437931<br>H 1.026398 2.442452 0.280250<br>H 1.651992 -0.883560 1.830064<br>H 0.309751 -0.000403 2.582388<br>H 1.654088 0.879721 1.830173<br>C -1.945066 0.003914 0.807985<br>H -2.511972 0.892351 0.499711<br>H -1.897514 0.005368 1.903946<br>H -2.514722 -0.883608 0.502159<br>C 1.893706 -0.003396 -0.973956<br>H 2.479228 0.877903 -0.682018<br>H 1.779972 -0.000798 -2.062681<br>H 2.474145 -0.889308 -0.685837 | -1166.010620<br>C 0.402723 -2.160510 1.578947<br>H -1.178125 -2.659196 -1.383888<br>H 0.202463 -3.137771 1.132829<br>H 1.445568 -2.007151 1.861115<br>H -0.310597 -1.850674 2.344553<br>O -0.235753 -2.440547 -1.367936<br>C 0.532440 0.534437 1.219696<br>C -0.325954 1.186004 2.110167<br>H -1.396345 0.972021 2.082876<br>C 0.170478 2.116685 3.031217<br>H -0.514217 2.617308 3.718938<br>C 1.537472 2.408903 3.068181<br>H 1.925357 3.135609 3.784262<br>C 2.403915 1.765168 2.182821<br>H 3.472131 1.990536 2.215034<br>Pd -0.000720 -0.885501 -0.124595<br>C 2.012875 -0.830737 -0.502167<br>C 2.744550 0.082877 0.290728<br>C 4.130441 0.221211 0.121122<br>H 4.697738 0.928421 0.731237<br>C 4.794970 -0.549468 -0.836277<br>C 4.076778 -1.460807 -1.621003<br>H 4.601502 -2.063385 -2.366540<br>H 5.873214 -0.441796 -0.970843<br>C 2.692727 -1.600586 -1.450451<br>H 2.124178 -2.312228 -2.054069<br>C 1.917149 0.829251 1.258591<br>C -2.046250 -0.880115 0.255980<br>C -2.790608 -1.841182 0.952325<br>H -2.283334 -2.699126 1.403943<br>C -4.182541 -1.734818 1.090454<br>H -4.739016 -2.497065 1.641042<br>C -4.860580 -0.652345 0.522172<br>H -5.943155 -0.563400 0.630160 |

|             |                                                                                                                                                                                                                                                                                                                                                                                                                                                                                                                                                                                                                                                                                                                                                                                                                  |                                                                                                                                                                                                                                                                                                                                                                                                                                                                                                                                                                                                                                                                                                                                                                                                                    |                                                                                                                                                                                                                                                                                                                                                                                                                                                                                                                                                                                                                                                                                                                                                                                                                  |                                                                                                                                                                                                                                                                                                                                                                                                                                                                                                                                                                                                                                                                                                                                                                                                                                                                                                                                                                                                                                                                                                                                                                   |
|-------------|------------------------------------------------------------------------------------------------------------------------------------------------------------------------------------------------------------------------------------------------------------------------------------------------------------------------------------------------------------------------------------------------------------------------------------------------------------------------------------------------------------------------------------------------------------------------------------------------------------------------------------------------------------------------------------------------------------------------------------------------------------------------------------------------------------------|--------------------------------------------------------------------------------------------------------------------------------------------------------------------------------------------------------------------------------------------------------------------------------------------------------------------------------------------------------------------------------------------------------------------------------------------------------------------------------------------------------------------------------------------------------------------------------------------------------------------------------------------------------------------------------------------------------------------------------------------------------------------------------------------------------------------|------------------------------------------------------------------------------------------------------------------------------------------------------------------------------------------------------------------------------------------------------------------------------------------------------------------------------------------------------------------------------------------------------------------------------------------------------------------------------------------------------------------------------------------------------------------------------------------------------------------------------------------------------------------------------------------------------------------------------------------------------------------------------------------------------------------|-------------------------------------------------------------------------------------------------------------------------------------------------------------------------------------------------------------------------------------------------------------------------------------------------------------------------------------------------------------------------------------------------------------------------------------------------------------------------------------------------------------------------------------------------------------------------------------------------------------------------------------------------------------------------------------------------------------------------------------------------------------------------------------------------------------------------------------------------------------------------------------------------------------------------------------------------------------------------------------------------------------------------------------------------------------------------------------------------------------------------------------------------------------------|
|             |                                                                                                                                                                                                                                                                                                                                                                                                                                                                                                                                                                                                                                                                                                                                                                                                                  |                                                                                                                                                                                                                                                                                                                                                                                                                                                                                                                                                                                                                                                                                                                                                                                                                    |                                                                                                                                                                                                                                                                                                                                                                                                                                                                                                                                                                                                                                                                                                                                                                                                                  | C -4.145126 0.311644 -0.192910<br>H -4.679991 1.149552 -0.646118<br>C -0.526233 0.850792 -1.099028<br>C -1.906550 1.137537 -1.086275<br>C -2.364720 2.257107 -1.798195<br>H -3.431590 2.489505 -1.813871<br>C -1.472426 3.075783 -2.491890<br>C -0.104207 2.786993 -2.477797<br>H 0.597025 3.427869 -3.015632<br>H -1.842673 3.943439 -3.040663<br>C 0.373185 1.678449 -1.767712<br>H 1.441750 1.462218 -1.741380<br>C -2.754968 0.196517 -0.331718                                                                                                                                                                                                                                                                                                                                                                                                                                                                                                                                                                                                                                                                                                               |
| <b>TS2P</b> | -1783.634730<br>C 1.947389 -0.172585 -0.722814<br>H 1.255104 -0.077766 -1.568022<br>H 2.651948 0.649967 -0.707522<br>H 2.395537 -1.154452 -0.675884<br>O 1.546611 -0.118377 1.054693<br>H 1.672028 0.818284 1.258117<br>Ni -0.111444 0.005027 0.004885<br>C -1.421547 0.079104 -1.382219<br>C -1.533268 0.052267 1.391667<br>H -1.913837 1.068269 1.507512<br>H -0.988340 -0.275103 2.281010<br>H -2.338653 -0.642722 1.151186<br>H -0.867139 0.087148 -2.331858<br>H -2.015121 0.993534 -1.314339<br>H -2.079654 -0.792177 -1.365909<br>C 0.072027 1.993433 -0.147558<br>H 0.812504 2.431856 0.545006<br>H -0.882816 2.494432 0.041651<br>H 0.390075 2.257856 -1.167021<br>C -0.191575 -1.959792 -0.109750<br>H -1.182577 -2.347474 0.144230<br>H 0.549176 -2.375348 0.583284<br>H 0.051151 -2.284598 -1.131721 | -402.271396<br>C 2.260348 -0.205601 -0.694013<br>H 1.631213 -0.077359 -1.579149<br>H 3.105448 0.472827 -0.715532<br>H 2.516841 -1.238061 -0.509898<br>O 1.789892 0.214777 0.993308<br>H 1.842189 1.181425 1.000426<br>Pd -0.105602 -0.006231 -0.022101<br>C -1.593343 -0.268880 -1.358226<br>C -1.678245 0.198286 1.367991<br>H -2.240826 1.101254 1.130607<br>H -1.163013 0.289121 2.326079<br>H -2.312886 -0.687294 1.340624<br>H -1.131131 -0.353970 -2.347916<br>H -2.273542 0.584761 -1.351460<br>H -2.148398 -1.183521 -1.142054<br>C -0.110596 2.102646 -0.306948<br>H 0.049873 2.602706 0.659677<br>H -1.072617 2.451199 -0.698051<br>H 0.676327 2.442568 -0.995295<br>C -0.031348 -2.092782 0.198930<br>H -0.993819 -2.506678 0.518417<br>H 0.731389 -2.349479 0.943438<br>H 0.240619 -2.563100 -0.756109 | -394.350474<br>C 2.478490 -0.146631 -0.660332<br>H 2.026784 0.330901 -1.526160<br>H 3.445896 0.273360 -0.404229<br>H 2.452449 -1.226013 -0.690610<br>O 1.797775 0.186898 0.967343<br>H 1.905209 1.145165 1.065949<br>Pt -0.096197 -0.006060 -0.042946<br>C -1.708314 -0.231528 -1.240124<br>C -1.509512 0.153105 1.466745<br>H -2.126019 1.040581 1.304770<br>H -0.942202 0.249146 2.396713<br>H -2.136824 -0.740830 1.497337<br>H -1.387880 -0.309944 -2.285602<br>H -2.390417 0.621789 -1.160147<br>H -2.265372 -1.140546 -0.989509<br>C -0.130333 2.101965 -0.263135<br>H 0.194006 2.598889 0.666012<br>H -1.142415 2.469986 -0.476150<br>H 0.523437 2.472945 -1.065447<br>C 0.012101 -2.096686 0.150732<br>H -0.931170 -2.528671 0.510925<br>H 0.803998 -2.381505 0.855731<br>H 0.237074 -2.579139 -0.811858 | -1165.978273<br>C -1.912481 1.081273 -1.200399<br>C -0.527344 0.807489 -1.208189<br>C 0.334850 1.586100 -1.980000<br>H 1.408527 1.385166 -1.967795<br>C -0.171130 2.627604 -2.769879<br>H 0.507698 3.231938 -3.375910<br>C -1.543308 2.895842 -2.778458<br>H -1.939523 3.707516 -3.391597<br>C -2.407270 2.127047 -1.995352<br>H -3.477137 2.347911 -2.006823<br>H 4.699477 1.057638 0.787642<br>C 4.143747 0.331214 0.189380<br>C 2.762580 0.169763 0.368153<br>C 4.821557 -0.439404 -0.759711<br>H 5.897016 -0.313380 -0.900163<br>C 2.035506 -0.768920 -0.403824<br>C 4.116143 -1.371752 -1.529689<br>C 2.734583 -1.530911 -1.349192<br>H 4.645741 -1.972982 -2.272970<br>H 2.188501 -2.259603 -1.955541<br>H -4.676921 1.103590 -0.739972<br>C -4.130609 0.331473 -0.193296<br>C -2.741289 0.210704 -0.335131<br>C -4.835255 -0.535478 0.647848<br>H -5.916983 -0.434953 0.755837<br>C -2.020287 -0.788006 0.371279<br>C -4.146950 -1.528905 1.348150<br>C -2.755728 -1.647217 1.201401<br>H -4.690833 -2.208628 2.008612<br>H -2.239531 -2.428820 1.769512<br>H -0.537466 2.726514 3.737125<br>C 0.156727 2.219009 3.063868<br>C -0.325472 1.258644 2.165057 |



|   |                                                                                                                                                                                                                                                                                                                                                                                                                                                                                                                                                                                                                                                                                                                                                                                                                   |                                                                                                                                                                                                                                                                                                                                                                                                                                                                                                                                                                                                                                                                                                                                                                                                                 |                                                                                                                                                                                                                                                                                                                                                                                                                                                                                                                                                                                                                                                                                                                                                                                                                  |                                                                                                                                                                                                                                                                                                                                                                                                                                                                                                                                                                                                                                                                                                                                                                                                                                                                                                                                                                                                                                                                                                                                     |
|---|-------------------------------------------------------------------------------------------------------------------------------------------------------------------------------------------------------------------------------------------------------------------------------------------------------------------------------------------------------------------------------------------------------------------------------------------------------------------------------------------------------------------------------------------------------------------------------------------------------------------------------------------------------------------------------------------------------------------------------------------------------------------------------------------------------------------|-----------------------------------------------------------------------------------------------------------------------------------------------------------------------------------------------------------------------------------------------------------------------------------------------------------------------------------------------------------------------------------------------------------------------------------------------------------------------------------------------------------------------------------------------------------------------------------------------------------------------------------------------------------------------------------------------------------------------------------------------------------------------------------------------------------------|------------------------------------------------------------------------------------------------------------------------------------------------------------------------------------------------------------------------------------------------------------------------------------------------------------------------------------------------------------------------------------------------------------------------------------------------------------------------------------------------------------------------------------------------------------------------------------------------------------------------------------------------------------------------------------------------------------------------------------------------------------------------------------------------------------------|-------------------------------------------------------------------------------------------------------------------------------------------------------------------------------------------------------------------------------------------------------------------------------------------------------------------------------------------------------------------------------------------------------------------------------------------------------------------------------------------------------------------------------------------------------------------------------------------------------------------------------------------------------------------------------------------------------------------------------------------------------------------------------------------------------------------------------------------------------------------------------------------------------------------------------------------------------------------------------------------------------------------------------------------------------------------------------------------------------------------------------------|
|   |                                                                                                                                                                                                                                                                                                                                                                                                                                                                                                                                                                                                                                                                                                                                                                                                                   |                                                                                                                                                                                                                                                                                                                                                                                                                                                                                                                                                                                                                                                                                                                                                                                                                 |                                                                                                                                                                                                                                                                                                                                                                                                                                                                                                                                                                                                                                                                                                                                                                                                                  | H -1.393124 1.035911 2.140896<br>C 1.518650 2.532761 3.096612<br>H 1.894043 3.283610 3.794431<br>C 0.544925 0.586298 1.298126<br>C 2.395758 1.883632 2.225275<br>C 1.925843 0.916248 1.326065<br>H 3.459215 2.132651 2.247084<br>Pd 0.022679 -0.814182 -0.028327<br>H 1.246369 -3.487147 0.299055<br>O -0.245911 -2.622208 -1.114718<br>C 0.248453 -3.160174 0.580766<br>H 0.236737 -2.580228 1.515077<br>H -1.212867 -2.717491 -1.094198<br>H -0.508073 -3.945204 0.597320                                                                                                                                                                                                                                                                                                                                                                                                                                                                                                                                                                                                                                                         |
| P | -1783.719458<br>C 2.357586 -1.015945 -0.356261<br>H 1.776605 -1.541465 0.407846<br>H 1.753380 -0.992451 -1.269945<br>H 3.271486 -1.577932 -0.554681<br>O 2.733061 0.277137 0.058408<br>H 1.924942 0.812588 0.119592<br>Ni -0.578563 0.073407 0.032494<br>C -1.412185 -0.057437 -1.729232<br>C -0.656780 0.479999 1.936423<br>H -0.870228 1.532874 2.135330<br>H 0.372434 0.270726 2.263696<br>H -1.334548 -0.168633 2.495775<br>H -1.712778 0.913753 -2.130211<br>H -2.243379 -0.765588 -1.762842<br>H -0.600349 -0.451882 -2.357029<br>C 0.023658 1.912241 -0.373314<br>H 0.684588 2.380777 0.370811<br>H -0.899562 2.501899 -0.385177<br>H 0.486797 2.003720 -1.364514<br>C -1.089112 -1.780047 0.397614<br>H -2.168347 -1.820835 0.579772<br>H -0.580007 -2.177485 1.284750<br>H -0.864761 -2.425434 -0.461664 | -402.351453<br>C -2.869707 -0.758737 -0.388731<br>H -2.094342 -1.420789 -0.790346<br>H -2.805873 -0.798606 0.704483<br>H -3.847517 -1.132777 -0.696383<br>O -2.740684 0.555490 -0.871138<br>H -1.890298 0.895691 -0.539530<br>Pd 0.480280 0.016323 0.034818<br>C 0.327069 -1.323164 1.605826<br>C 1.698573 1.472742 -0.778485<br>H 1.792386 2.318873 -0.100214<br>H 1.121643 1.751755 -1.666744<br>H 2.664182 1.058951 -1.062943<br>H 0.184075 -0.796301 2.547923<br>H 1.191489 -1.984310 1.629521<br>H -0.572983 -1.884550 1.333627<br>C -0.511361 1.491403 1.198098<br>H -0.777550 2.411418 0.658336<br>H 0.200974 1.778844 1.981183<br>H -1.416275 1.125198 1.704208<br>C 1.510634 -1.443335 -1.062851<br>H 2.510320 -1.581056 -0.631972<br>H 1.639324 -1.154702 -2.113655<br>H 1.001775 -2.415897 -1.033193 | -394.429452<br>C -3.118060 -0.670603 -0.383371<br>H -2.452047 -1.436017 -0.796733<br>H -2.991378 -0.674761 0.705054<br>H -4.149896 -0.937607 -0.617465<br>O -2.866305 0.597336 -0.933800<br>H -1.960870 0.843126 -0.670324<br>Pt 0.387165 0.005983 0.031772<br>C 0.069108 -1.397102 1.506711<br>C 1.619384 1.482907 -0.697984<br>H 1.703348 2.330488 -0.016430<br>H 1.090859 1.803366 -1.606757<br>H 2.602722 1.099801 -0.974364<br>H -0.170491 -0.944507 2.470494<br>H 0.913614 -2.082296 1.595693<br>H -0.801282 -1.959282 1.141553<br>C -0.615737 1.454460 1.208433<br>H -0.842845 2.392636 0.682163<br>H 0.045261 1.720164 2.044876<br>H -1.555742 1.097341 1.653890<br>C 1.435257 -1.431257 -1.089262<br>H 2.420913 -1.609034 -0.635980<br>H 1.615711 -1.116090 -2.125705<br>H 0.923984 -2.403129 -1.124908 | -1166.050307<br>C -2.523996 -0.364618 -0.822017<br>C -1.209160 -0.898583 -0.812883<br>C -0.940634 -2.081719 -1.509112<br>H 0.076475 -2.474286 -1.535494<br>C -1.974561 -2.779944 -2.153867<br>H -1.757804 -3.712292 -2.678424<br>C -3.279647 -2.283275 -2.114303<br>H -4.088021 -2.829134 -2.603552<br>C -3.549239 -1.078316 -1.457564<br>H -4.569858 -0.690267 -1.449417<br>H 5.134416 -0.901155 -0.020568<br>C 4.155816 -1.351365 0.164017<br>C 2.989427 -0.581668 0.074442<br>C 4.076443 -2.706386 0.500780<br>H 4.985154 -3.307099 0.574657<br>C 1.709733 -1.149331 0.303438<br>C 2.828024 -3.285154 0.747215<br>C 1.662993 -2.509815 0.646573<br>H 2.761818 -4.341382 1.018616<br>H 0.695788 -2.987669 0.839363<br>H -4.819925 1.204531 -0.434652<br>C -3.900746 1.624089 -0.018581<br>C -2.684748 0.939851 -0.142722<br>C -3.949149 2.852877 0.646340<br>H -4.896260 3.386853 0.744539<br>C -1.476863 1.467030 0.386978<br>C -2.777223 3.389708 1.186803<br>C -1.563391 2.699170 1.054580<br>H -2.809839 4.347210 1.712410<br>H -0.659536 3.139752 1.487424<br>H 2.494929 4.615875 -1.205304<br>C 2.623657 3.566582 -0.931323 |

|             |                                                                                                                                                                                                                                                                                                                                                                                                                                                                                                                                                                                                                                                                                                      |                                                                                                                                                                                                                                                                                                                                                                                                                                                                                                                                                                                                                                                                                                         |                                                                                                                                                                                                                                                                                                                                                                                                                                                                                                                                                                                                                                                                                                         |                                                                                                                                                                                                                                                                                                                                                                                                                                                                                                                                                                                                                                                                                                                                                                                                                                                                                                                                                                                                                                                                                      |
|-------------|------------------------------------------------------------------------------------------------------------------------------------------------------------------------------------------------------------------------------------------------------------------------------------------------------------------------------------------------------------------------------------------------------------------------------------------------------------------------------------------------------------------------------------------------------------------------------------------------------------------------------------------------------------------------------------------------------|---------------------------------------------------------------------------------------------------------------------------------------------------------------------------------------------------------------------------------------------------------------------------------------------------------------------------------------------------------------------------------------------------------------------------------------------------------------------------------------------------------------------------------------------------------------------------------------------------------------------------------------------------------------------------------------------------------|---------------------------------------------------------------------------------------------------------------------------------------------------------------------------------------------------------------------------------------------------------------------------------------------------------------------------------------------------------------------------------------------------------------------------------------------------------------------------------------------------------------------------------------------------------------------------------------------------------------------------------------------------------------------------------------------------------|--------------------------------------------------------------------------------------------------------------------------------------------------------------------------------------------------------------------------------------------------------------------------------------------------------------------------------------------------------------------------------------------------------------------------------------------------------------------------------------------------------------------------------------------------------------------------------------------------------------------------------------------------------------------------------------------------------------------------------------------------------------------------------------------------------------------------------------------------------------------------------------------------------------------------------------------------------------------------------------------------------------------------------------------------------------------------------------|
|             |                                                                                                                                                                                                                                                                                                                                                                                                                                                                                                                                                                                                                                                                                                      |                                                                                                                                                                                                                                                                                                                                                                                                                                                                                                                                                                                                                                                                                                         |                                                                                                                                                                                                                                                                                                                                                                                                                                                                                                                                                                                                                                                                                                         | C 1.505388 2.787818 -0.597046<br>H 0.509537 3.232197 -0.623137<br>C 3.899143 2.997199 -0.918077<br>H 4.770657 3.600460 -1.179524<br>C 1.659294 1.448581 -0.230409<br>C 4.058407 1.648441 -0.584777<br>C 2.949115 0.859229 -0.253540<br>H 5.057604 1.207065 -0.594658<br>Pd 0.141576 0.184648 0.262199<br>H -0.784712 -1.568543 2.254579<br>O -2.106470 -3.037242 1.557852<br>C -1.835826 -1.894019 2.346905<br>H -2.482019 -1.043410 2.080014<br>H -1.969578 -2.802306 0.626423<br>H -2.023129 -2.170556 3.391624                                                                                                                                                                                                                                                                                                                                                                                                                                                                                                                                                                    |
| <b>TSOR</b> | -1852.606444<br>Ni 0.701447 0.026890 0.000543<br>C 1.063369 1.944245 -0.000292<br>C 0.588732 0.018403 -1.963357<br>C 1.367848 -1.810029 0.000082<br>C 0.585773 0.019349 1.964345<br>H 0.148609 -0.915199 2.341207<br>H -0.001646 0.868428 2.338863<br>H 1.600121 0.105171 2.369770<br>H 1.587025 2.276585 -0.900153<br>H 1.585846 2.276608 0.900275<br>H 0.055844 2.380829 -0.000791<br>H 0.000166 0.866073 -2.339273<br>H 0.154744 -0.917197 -2.341297<br>H 1.603642 0.106783 -2.366911<br>H 1.933946 -2.054976 0.902467<br>H 1.944521 -2.049281 -0.897108<br>H 0.448712 -2.411095 -0.007597<br>O -2.499349 0.996128 -0.001805<br>N -2.254619 -1.290766 0.000112<br>N -2.365608 -0.178731 -0.000809 | -471.237875<br>Pd 0.616744 0.002989 0.046311<br>C 0.620607 1.859697 0.950217<br>C 1.698828 0.786102 -1.578312<br>C 1.655353 -1.775491 -0.121739<br>C -0.448806 -0.782093 1.694973<br>H -0.825319 -1.796881 1.504860<br>H -1.298482 -0.149729 1.992104<br>H 0.224217 -0.840665 2.560026<br>H 1.448904 2.470051 0.594093<br>H 0.613980 1.760624 2.034359<br>H -0.337578 2.256115 0.595843<br>H 1.276191 1.731170 -1.944582<br>H 1.753521 0.085164 -2.421951<br>H 2.727355 0.990553 -1.253467<br>H 1.728293 -2.275622 0.842524<br>H 2.628491 -1.621276 -0.584905<br>H 0.990984 -2.330725 -0.793528<br>O -2.871286 1.005304 -0.159802<br>N -2.621970 -1.170209 -0.861969<br>N -2.733230 -0.113790 -0.516332 | -463.318556<br>O -1.655388 0.732080 0.025014<br>C 1.846480 -0.380140 -1.198985<br>C 1.738413 -0.461235 1.283927<br>C -0.319058 -1.998730 -0.056002<br>H 0.547728 -2.672062 -0.103558<br>H -0.955457 -2.206416 -0.923722<br>H -0.903979 -2.265261 0.831884<br>C 0.839645 2.056889 0.008322<br>H 0.762720 2.479787 -1.001300<br>H 1.877372 2.191982 0.340746<br>H 0.188645 2.651301 0.657858<br>H 2.055976 -1.499771 1.174313<br>H 1.280650 -0.324944 2.267281<br>H 2.605663 0.196233 1.197181<br>H 1.449909 -0.275560 -2.212924<br>H 2.227218 -1.395507 -1.069216<br>H 2.660998 0.333893 -1.058790<br>N -3.834476 0.111149 -0.007624<br>N -2.709436 -0.177535 0.005323<br>Pt 0.264361 0.026842 -0.006504 | -1234.931139<br>C 2.280608 1.170726 -0.990179<br>C 0.925861 1.497319 -0.725794<br>C 0.426328 2.737808 -1.132590<br>H -0.625072 2.978157 -0.971521<br>C 1.266445 3.677612 -1.747851<br>H 0.867479 4.647456 -2.052678<br>C 2.610217 3.370169 -1.974300<br>H 3.265941 4.099275 -2.454124<br>C 3.111741 2.120324 -1.599408<br>H 4.159485 1.881683 -1.795275<br>H -5.281382 0.174069 0.186252<br>C -4.393501 0.756561 0.444544<br>C -3.112412 0.257965 0.176722<br>C -4.547446 2.005423 1.054353<br>H -5.545700 2.393419 1.266720<br>C -1.945329 0.999660 0.496807<br>C -3.414372 2.750097 1.393525<br>C -2.135326 2.246905 1.112400<br>H -3.527746 3.724019 1.876143<br>H -1.263001 2.851213 1.381365<br>H 4.806275 -0.059951 -1.062976<br>C 4.001095 -0.682968 -0.666351<br>C 2.691942 -0.191856 -0.591437<br>C 4.293366 -1.971755 -0.209784<br>H 5.315582 -2.352041 -0.257051<br>C 1.630034 -0.982423 -0.080213<br>C 3.268974 -2.767069 0.312871<br>C 1.956524 -2.273151 0.366465<br>H 3.492548 -3.773207 0.675775<br>H 1.169601 -2.911486 0.780910<br>H -1.784313 -4.391921 -2.173018 |

|            |                                                                                                                                                                                                                                                                                                                                                                                                                                                                                                                                                                                                                                                                                                                   |                                                                                                                                                                                                                                                                                                                                                                                                                                                                                                                                                                                                                                                                                                         |                                                                                                                                                                                                                                                                                                                                                                                                                                                                                                                                                                                                                                                                                                                |                                                                                                                                                                                                                                                                                                                                                                                                                                                                                                                                                                                                                                                                                                                                                                                                                                                                                                                                                                                                                                                                                                                                                    |
|------------|-------------------------------------------------------------------------------------------------------------------------------------------------------------------------------------------------------------------------------------------------------------------------------------------------------------------------------------------------------------------------------------------------------------------------------------------------------------------------------------------------------------------------------------------------------------------------------------------------------------------------------------------------------------------------------------------------------------------|---------------------------------------------------------------------------------------------------------------------------------------------------------------------------------------------------------------------------------------------------------------------------------------------------------------------------------------------------------------------------------------------------------------------------------------------------------------------------------------------------------------------------------------------------------------------------------------------------------------------------------------------------------------------------------------------------------|----------------------------------------------------------------------------------------------------------------------------------------------------------------------------------------------------------------------------------------------------------------------------------------------------------------------------------------------------------------------------------------------------------------------------------------------------------------------------------------------------------------------------------------------------------------------------------------------------------------------------------------------------------------------------------------------------------------|----------------------------------------------------------------------------------------------------------------------------------------------------------------------------------------------------------------------------------------------------------------------------------------------------------------------------------------------------------------------------------------------------------------------------------------------------------------------------------------------------------------------------------------------------------------------------------------------------------------------------------------------------------------------------------------------------------------------------------------------------------------------------------------------------------------------------------------------------------------------------------------------------------------------------------------------------------------------------------------------------------------------------------------------------------------------------------------------------------------------------------------------------|
|            |                                                                                                                                                                                                                                                                                                                                                                                                                                                                                                                                                                                                                                                                                                                   |                                                                                                                                                                                                                                                                                                                                                                                                                                                                                                                                                                                                                                                                                                         |                                                                                                                                                                                                                                                                                                                                                                                                                                                                                                                                                                                                                                                                                                                | C -2.079562 -3.461414 -1.683401<br>C -1.098227 -2.574521 -1.215526<br>H -0.043438 -2.815346 -1.352393<br>C -3.432178 -3.150723 -1.525848<br>H -4.198284 -3.837977 -1.890092<br>C -1.462879 -1.387749 -0.575196<br>C -3.805391 -1.950194 -0.913894<br>C -2.834713 -1.053673 -0.447027<br>H -4.865557 -1.708188 -0.810367<br>Pd -0.166446 0.013369 0.141371<br>O 1.195978 -0.929217 3.343170<br>N 2.172825 -0.345209 2.996914<br>N 3.103674 0.211087 2.678878                                                                                                                                                                                                                                                                                                                                                                                                                                                                                                                                                                                                                                                                                        |
| <b>TSO</b> | -1852.589337<br>O 1.309020 0.701473 -0.000011<br>C -1.843483 -0.358129 1.189486<br>C -1.843518 -0.358157 -1.189446<br>C 0.115681 -1.855076 -0.000008<br>H -0.724874 -2.557423 -0.000019<br>H 0.736158 -2.028561 0.884768<br>H 0.736188 -2.028564 -0.884763<br>C -0.910353 1.943199 -0.000013<br>H -0.459464 2.397861 0.886963<br>H -1.990251 2.128461 0.000019<br>H -0.459532 2.397823 -0.887045<br>H -2.203971 -1.385170 -1.156657<br>H -1.244308 -0.197124 -2.092881<br>H -2.674115 0.345287 -1.160383<br>H -1.244274 -0.196965 2.092899<br>H -2.203857 -1.385173 1.156795<br>H -2.674132 0.345251 1.160373<br>N 3.604495 0.154825 0.000009<br>N 2.532367 -0.230283 0.000000<br>Ni -0.433347 0.030346 -0.000006 | -471.231451<br>O -1.531962 0.798084 -0.027099<br>C 1.756374 -0.485691 -1.320212<br>C 1.968587 -0.393419 1.150085<br>C -0.252194 -1.975938 0.088122<br>H 0.597923 -2.665366 0.155844<br>H -0.829610 -2.211607 -0.811359<br>H -0.906161 -2.129903 0.952017<br>C 0.985179 2.049593 -0.003530<br>H 0.301455 2.645918 -0.613230<br>H 2.007068 2.159050 -0.385461<br>H 0.958235 2.437544 1.020963<br>H 2.326969 -1.413182 1.013305<br>H 1.549361 -0.276934 2.152822<br>H 2.776415 0.321723 0.997660<br>H 1.210600 -0.307467 -2.248942<br>H 2.031445 -1.535498 -1.235610<br>H 2.637798 0.151433 -1.271172<br>N -3.807041 0.132757 0.006494<br>N -2.716911 -0.192011 -0.008302<br>Pd 0.359004 0.036676 0.022083 | -463.317997<br>O 1.613943 0.762190 -0.022812<br>C -1.827993 -0.398057 1.217152<br>C -1.755808 -0.483312 -1.265294<br>C 0.341070 -1.990897 0.050365<br>H -0.517230 -2.674847 0.097426<br>H 0.978898 -2.190004 0.919055<br>H 0.928897 -2.249274 -0.838089<br>C -0.874068 2.050705 -0.009194<br>H -0.800407 2.472851 1.000726<br>H -1.916225 2.162781 -0.336008<br>H -0.240067 2.659804 -0.661654<br>H -2.058904 -1.525869 -1.150044<br>H -1.317685 -0.343433 -2.257303<br>H -2.631558 0.161645 -1.167288<br>H -1.420456 -0.286951 2.226012<br>H -2.198015 -1.418284 1.093614<br>H -2.653421 0.305274 1.086313<br>N 3.852992 0.134889 0.005585<br>N 2.757326 -0.196862 0.000941<br>Pt -0.264574 0.028102 0.002127 | -1234.919040<br>C 1.967849 1.125229 1.140083<br>C 0.565849 0.954495 1.038713<br>C -0.290189 1.838678 1.698477<br>H -1.369983 1.723253 1.610906<br>C 0.232607 2.880671 2.475219<br>H -0.447748 3.561009 2.990424<br>C 1.614120 3.052179 2.583928<br>H 2.021797 3.864667 3.187665<br>C 2.472923 2.176335 1.917565<br>H 3.553073 2.303220 2.012667<br>H -4.384120 1.665132 -0.968544<br>C -3.953174 0.907213 -0.310097<br>C -2.603047 0.547532 -0.422459<br>C -4.753054 0.301558 0.660945<br>H -5.803670 0.580909 0.758554<br>C -2.030557 -0.436045 0.414744<br>C -4.199573 -0.664160 1.509705<br>C -2.853406 -1.029988 1.379696<br>H -4.823228 -1.138374 2.270925<br>H -2.446316 -1.800569 2.038665<br>H 4.766578 0.962070 0.781239<br>C 4.187563 0.158220 0.320398<br>C 2.790497 0.128834 0.428964<br>C 4.849464 -0.850136 -0.385283<br>H 5.936982 -0.828494 -0.478127<br>C 2.036506 -0.908873 -0.162209<br>C 4.114963 -1.889595 -0.967043<br>C 2.718272 -1.919321 -0.848033<br>H 4.635232 -2.681533 -1.511082<br>H 2.149937 -2.744179 -1.284060<br>H 1.138635 2.529137 -3.722104<br>C 0.357256 2.142936 -3.065501<br>C 0.698667 1.254741 -2.037778 |

|             |                                                                                                                                                                                                                                                                                                                                                                                                                                                                                                                                                                                                                                                                                                        |                                                                                                                                                                                                                                                                                                                                                                                                                                                                                                                                                                                                                                                                                                           |                                                                                                                                                                                                                                                                                                                                                                                                                                                                                                                                                                                                                                                                                                           |                                                                                                                                                                                                                                                                                                                                                                                                                                                                                                                                                                                                                                                                                                                                                                                                                                                                                                                                                                                                                                                                                                                                                                                                                              |
|-------------|--------------------------------------------------------------------------------------------------------------------------------------------------------------------------------------------------------------------------------------------------------------------------------------------------------------------------------------------------------------------------------------------------------------------------------------------------------------------------------------------------------------------------------------------------------------------------------------------------------------------------------------------------------------------------------------------------------|-----------------------------------------------------------------------------------------------------------------------------------------------------------------------------------------------------------------------------------------------------------------------------------------------------------------------------------------------------------------------------------------------------------------------------------------------------------------------------------------------------------------------------------------------------------------------------------------------------------------------------------------------------------------------------------------------------------|-----------------------------------------------------------------------------------------------------------------------------------------------------------------------------------------------------------------------------------------------------------------------------------------------------------------------------------------------------------------------------------------------------------------------------------------------------------------------------------------------------------------------------------------------------------------------------------------------------------------------------------------------------------------------------------------------------------|------------------------------------------------------------------------------------------------------------------------------------------------------------------------------------------------------------------------------------------------------------------------------------------------------------------------------------------------------------------------------------------------------------------------------------------------------------------------------------------------------------------------------------------------------------------------------------------------------------------------------------------------------------------------------------------------------------------------------------------------------------------------------------------------------------------------------------------------------------------------------------------------------------------------------------------------------------------------------------------------------------------------------------------------------------------------------------------------------------------------------------------------------------------------------------------------------------------------------|
|             |                                                                                                                                                                                                                                                                                                                                                                                                                                                                                                                                                                                                                                                                                                        |                                                                                                                                                                                                                                                                                                                                                                                                                                                                                                                                                                                                                                                                                                           |                                                                                                                                                                                                                                                                                                                                                                                                                                                                                                                                                                                                                                                                                                           | H 1.737413 0.960910 -1.895030<br>C -0.970831 2.536420 -3.245408<br>H -1.234653 3.228357 -4.046766<br>C -0.296302 0.751608 -1.200285<br>C -1.960904 2.039604 -2.396469<br>C -1.642894 1.146602 -1.363694<br>H -3.000209 2.339379 -2.543984<br>N -1.491379 -4.603681 0.043771<br>N -1.392727 -3.459398 0.096016<br>O -0.041895 -2.739991 0.007353<br>Pd -0.004814 -0.731127 0.103832                                                                                                                                                                                                                                                                                                                                                                                                                                                                                                                                                                                                                                                                                                                                                                                                                                           |
| <b>TSOP</b> | -1852.637716<br>O -0.577697 0.192100 -1.569024<br>C 2.347874 -0.114361 0.161056<br>C 0.536280 -0.196140 1.700170<br>C 0.251797 -1.949927 -0.395792<br>H 1.061293 -2.489476 0.108146<br>H 0.212583 -2.233807 -1.449416<br>H -0.700689 -2.215318 0.074702<br>C 0.581468 1.983377 -0.106771<br>H 1.191088 2.324224 -0.948604<br>H 1.042478 2.310673 0.831320<br>H -0.418470 2.414396 -0.200567<br>H 0.838288 -1.191814 2.026680<br>H -0.538013 -0.057294 1.869203<br>H 1.094420 0.568967 2.240611<br>H 2.659199 -0.124446 -0.888872<br>H 2.670989 -1.029887 0.656183<br>H 2.753709 0.760799 0.668420<br>N -3.015364 0.604802 0.376363<br>N -3.142856 -0.479537 0.333451<br>Ni 0.484204 0.007558 -0.198439 | -471.275858<br>O -0.779366 1.234736 -1.119289<br>C 2.180524 -0.914258 -0.275973<br>C 0.603576 -0.863410 1.620080<br>C -0.678002 -1.607504 -0.837122<br>H 0.011191 -2.394398 -1.162662<br>H -1.340125 -1.341349 -1.665045<br>H -1.285752 -2.003624 -0.016537<br>C 1.524105 1.753622 0.497271<br>H 2.260367 2.010657 -0.271020<br>H 2.057457 1.517732 1.424619<br>H 0.876123 2.617570 0.660068<br>H 0.594527 -1.948778 1.522683<br>H -0.310289 -0.526394 2.116402<br>H 1.480045 -0.538545 2.180568<br>H 2.479223 -0.675235 -1.299996<br>H 2.075895 -1.993313 -0.162795<br>H 2.920333 -0.528576 0.425873<br>N -3.013007 0.168444 0.934754<br>N -3.616547 0.116043 0.025472<br>Pd 0.413948 0.080962 -0.164021 | -463.373306<br>O 0.814054 -1.213608 -1.069358<br>C -2.077370 0.974015 -0.235179<br>C -0.479332 0.895393 1.673281<br>C 0.773658 1.631047 -0.795252<br>H 0.086033 2.429983 -1.094468<br>H 1.426638 1.397751 -1.640838<br>H 1.398465 2.019696 0.017046<br>C -1.475316 -1.693039 0.583997<br>H -2.239537 -1.951163 -0.157138<br>H -1.988191 -1.418046 1.512473<br>H -0.871880 -2.585318 0.768480<br>H -0.482064 1.982953 1.567519<br>H 0.419778 0.596606 2.221324<br>H -1.362648 0.590329 2.239507<br>H -2.457343 0.765726 -1.239942<br>H -1.947438 2.053271 -0.124160<br>H -2.810934 0.627492 0.497379<br>N 3.162680 -0.167554 0.955559<br>N 3.700746 -0.126527 0.005445<br>Pt -0.309963 -0.071620 -0.129493 | -1234.968563<br>C -1.723246 0.314797 -1.413009<br>C -0.360365 0.016702 -1.176588<br>C 0.526878 -0.090690 -2.249035<br>H 1.578947 -0.307943 -2.066020<br>C 0.069705 0.083490 -3.560379<br>H 0.771028 -0.007011 -4.391686<br>C -1.274835 0.376187 -3.804691<br>H -1.631006 0.511719 -4.827168<br>C -2.161913 0.489084 -2.733417<br>H -3.215201 0.702145 -2.925693<br>H 4.896686 0.863655 -0.125487<br>C 4.255398 -0.009792 0.015061<br>C 2.879829 0.142521 0.238951<br>C 4.815313 -1.289142 -0.032144<br>H 5.885305 -1.411063 -0.211209<br>C 2.045831 -0.983579 0.420663<br>C 4.001346 -2.412284 0.153434<br>C 2.627369 -2.255666 0.383679<br>H 4.441788 -3.411780 0.122752<br>H 1.999702 -3.136049 0.542293<br>H -4.447910 1.005039 -1.143570<br>C -3.945009 0.717864 -0.217223<br>C -2.589354 0.360579 -0.221059<br>C -4.663040 0.707850 0.981179<br>H -5.717614 0.989626 0.988951<br>C -1.933746 -0.014643 0.973045<br>C -4.028215 0.328695 2.169279<br>C -2.674803 -0.036213 2.159651<br>H -4.593858 0.310978 3.103867<br>H -2.192212 -0.351433 3.087747<br>H 0.020811 4.674297 0.597630<br>C 0.624314 3.768337 0.516611<br>C -0.002729 2.516741 0.522018<br>H -1.088545 2.454713 0.596816<br>C 2.014019 3.858373 0.400237 |

|  |  |  |  |    |           |           |           |
|--|--|--|--|----|-----------|-----------|-----------|
|  |  |  |  | H  | 2.503251  | 4.833817  | 0.394111  |
|  |  |  |  | C  | 0.756305  | 1.348528  | 0.426386  |
|  |  |  |  | C  | 2.774933  | 2.692916  | 0.295384  |
|  |  |  |  | C  | 2.164170  | 1.430895  | 0.306120  |
|  |  |  |  | H  | 3.861782  | 2.763927  | 0.218240  |
|  |  |  |  | N  | -1.684049 | -3.114761 | -1.033148 |
|  |  |  |  | N  | -2.552666 | -3.063794 | -0.350431 |
|  |  |  |  | Pd | 0.054841  | -0.518859 | 0.716260  |
|  |  |  |  | O  | -0.140944 | -1.967068 | 1.931324  |

**Table S5.** Harmonic frequencies ( $\text{cm}^{-1}$ ) of all intermediates and transition states (see Figure 2 of the manuscript) for the reaction  $\text{CH}_4 + \text{N}_2\text{O} \rightarrow \text{CH}_3\text{OH} + \text{N}_2$  catalyzed by  $[\text{M}]\text{O}^-$ . Negative values indicate imaginary frequencies.

|          | $[\text{M}] = (\text{CH}_3)_4\text{Ni}$ | $[\text{M}] = (\text{CH}_3)_4\text{Pd}$ | $[\text{M}] = (\text{CH}_3)_4\text{Pt}$ | $[\text{M}] = (\text{Bp})_2\text{Pd}$ |
|----------|-----------------------------------------|-----------------------------------------|-----------------------------------------|---------------------------------------|
| <b>R</b> | -7                                      | 24                                      | 19                                      | -32                                   |
|          | 59                                      | 53                                      | 48                                      | 39                                    |
|          | 84                                      | 71                                      | 71                                      | 44                                    |
|          | 91                                      | 88                                      | 83                                      | 48                                    |
|          | 96                                      | 93                                      | 93                                      | 54                                    |
|          | 123                                     | 107                                     | 96                                      | 72                                    |
|          | 133                                     | 115                                     | 116                                     | 88                                    |
|          | 151                                     | 132                                     | 129                                     | 90                                    |
|          | 159                                     | 137                                     | 135                                     | 100                                   |
|          | 184                                     | 171                                     | 149                                     | 108                                   |
|          | 214                                     | 182                                     | 192                                     | 127                                   |
|          | 232                                     | 185                                     | 195                                     | 135                                   |
|          | 236                                     | 213                                     | 222                                     | 150                                   |
|          | 260                                     | 217                                     | 231                                     | 155                                   |
|          | 275                                     | 251                                     | 249                                     | 164                                   |
|          | 291                                     | 286                                     | 288                                     | 173                                   |
|          | 318                                     | 306                                     | 328                                     | 182                                   |
|          | 478                                     | 467                                     | 479                                     | 203                                   |
|          | 511                                     | 485                                     | 533                                     | 207                                   |
|          | 553                                     | 517                                     | 560                                     | 235                                   |
|          | 579                                     | 568                                     | 586                                     | 271                                   |
|          | 588                                     | 572                                     | 637                                     | 276                                   |
|          | 621                                     | 639                                     | 706                                     | 291                                   |
|          | 690                                     | 698                                     | 753                                     | 303                                   |
|          | 703                                     | 727                                     | 784                                     | 335                                   |
|          | 720                                     | 749                                     | 803                                     | 365                                   |
|          | 767                                     | 755                                     | 824                                     | 368                                   |
|          | 805                                     | 837                                     | 866                                     | 415                                   |
|          | 836                                     | 847                                     | 875                                     | 417                                   |
|          | 841                                     | 848                                     | 877                                     | 438                                   |
|          | 1101                                    | 1116                                    | 1169                                    | 452                                   |
|          | 1113                                    | 1130                                    | 1185                                    | 468                                   |
|          | 1158                                    | 1184                                    | 1228                                    | 473                                   |
|          | 1201                                    | 1222                                    | 1263                                    | 495                                   |
|          | 1282                                    | 1287                                    | 1289                                    | 495                                   |
|          | 1330                                    | 1326                                    | 1321                                    | 548                                   |
|          | 1339                                    | 1334                                    | 1334                                    | 577                                   |
|          | 1417                                    | 1425                                    | 1432                                    | 580                                   |
|          | 1419                                    | 1425                                    | 1434                                    | 601                                   |
|          | 1425                                    | 1430                                    | 1438                                    | 601                                   |

|  |      |      |      |      |
|--|------|------|------|------|
|  | 1428 | 1435 | 1442 | 639  |
|  | 1437 | 1439 | 1446 | 642  |
|  | 1444 | 1443 | 1451 | 651  |
|  | 1445 | 1449 | 1457 | 655  |
|  | 1454 | 1452 | 1460 | 723  |
|  | 1541 | 1539 | 1537 | 726  |
|  | 1543 | 1542 | 1541 | 729  |
|  | 2993 | 2999 | 2997 | 730  |
|  | 2999 | 3002 | 3000 | 736  |
|  | 3010 | 3024 | 3005 | 738  |
|  | 3014 | 3027 | 3010 | 750  |
|  | 3028 | 3036 | 3041 | 751  |
|  | 3065 | 3067 | 3057 | 797  |
|  | 3077 | 3070 | 3059 | 799  |
|  | 3092 | 3094 | 3073 | 863  |
|  | 3096 | 3095 | 3080 | 867  |
|  | 3100 | 3105 | 3081 | 875  |
|  | 3105 | 3113 | 3084 | 877  |
|  | 3116 | 3122 | 3085 | 942  |
|  | 3125 | 3129 | 3092 | 944  |
|  | 3142 | 3144 | 3146 | 948  |
|  | 3143 | 3150 | 3153 | 951  |
|  | 3144 | 3154 | 3165 | 966  |
|  |      |      |      | 972  |
|  |      |      |      | 975  |
|  |      |      |      | 976  |
|  |      |      |      | 977  |
|  |      |      |      | 977  |
|  |      |      |      | 1021 |
|  |      |      |      | 1032 |
|  |      |      |      | 1042 |
|  |      |      |      | 1043 |
|  |      |      |      | 1061 |
|  |      |      |      | 1062 |
|  |      |      |      | 1071 |
|  |      |      |      | 1072 |
|  |      |      |      | 1115 |
|  |      |      |      | 1117 |
|  |      |      |      | 1120 |
|  |      |      |      | 1123 |
|  |      |      |      | 1138 |
|  |      |      |      | 1138 |
|  |      |      |      | 1143 |
|  |      |      |      | 1145 |
|  |      |      |      | 1232 |
|  |      |      |      | 1233 |
|  |      |      |      | 1255 |

|  |  |  |  |      |
|--|--|--|--|------|
|  |  |  |  | 1256 |
|  |  |  |  | 1258 |
|  |  |  |  | 1266 |
|  |  |  |  | 1284 |
|  |  |  |  | 1307 |
|  |  |  |  | 1309 |
|  |  |  |  | 1326 |
|  |  |  |  | 1330 |
|  |  |  |  | 1347 |
|  |  |  |  | 1348 |
|  |  |  |  | 1432 |
|  |  |  |  | 1433 |
|  |  |  |  | 1442 |
|  |  |  |  | 1443 |
|  |  |  |  | 1463 |
|  |  |  |  | 1465 |
|  |  |  |  | 1495 |
|  |  |  |  | 1497 |
|  |  |  |  | 1499 |
|  |  |  |  | 1501 |
|  |  |  |  | 1612 |
|  |  |  |  | 1614 |
|  |  |  |  | 1619 |
|  |  |  |  | 1620 |
|  |  |  |  | 1637 |
|  |  |  |  | 1637 |
|  |  |  |  | 1644 |
|  |  |  |  | 1646 |
|  |  |  |  | 3042 |
|  |  |  |  | 3173 |
|  |  |  |  | 3174 |
|  |  |  |  | 3175 |
|  |  |  |  | 3179 |
|  |  |  |  | 3179 |
|  |  |  |  | 3180 |
|  |  |  |  | 3181 |
|  |  |  |  | 3186 |
|  |  |  |  | 3187 |
|  |  |  |  | 3192 |
|  |  |  |  | 3195 |
|  |  |  |  | 3197 |
|  |  |  |  | 3199 |
|  |  |  |  | 3208 |
|  |  |  |  | 3208 |
|  |  |  |  | 3213 |
|  |  |  |  | 3214 |
|  |  |  |  | 3224 |



|             |       |       |       |       |
|-------------|-------|-------|-------|-------|
|             |       |       |       | 3227  |
| <b>TS1R</b> | -1858 | -1894 | -1901 | -1954 |
|             | 32    | 43    | 52    | 27    |
|             | 47    | 78    | 75    | 41    |
|             | 81    | 87    | 88    | 42    |
|             | 109   | 94    | 93    | 48    |
|             | 129   | 101   | 122   | 79    |
|             | 138   | 131   | 131   | 87    |
|             | 190   | 162   | 163   | 95    |
|             | 236   | 183   | 188   | 103   |
|             | 245   | 194   | 197   | 128   |
|             | 256   | 230   | 235   | 136   |
|             | 264   | 238   | 236   | 144   |
|             | 295   | 250   | 249   | 163   |
|             | 295   | 279   | 275   | 172   |
|             | 329   | 301   | 323   | 189   |
|             | 388   | 392   | 410   | 201   |
|             | 393   | 396   | 415   | 209   |
|             | 479   | 462   | 479   | 233   |
|             | 502   | 488   | 533   | 270   |
|             | 541   | 509   | 548   | 280   |
|             | 574   | 575   | 585   | 293   |
|             | 584   | 582   | 600   | 302   |
|             | 601   | 592   | 616   | 334   |
|             | 602   | 604   | 668   | 363   |
|             | 689   | 697   | 742   | 368   |
|             | 697   | 710   | 763   | 406   |
|             | 719   | 754   | 804   | 417   |
|             | 776   | 764   | 831   | 419   |
|             | 794   | 840   | 873   | 428   |
|             | 834   | 850   | 886   | 450   |
|             | 843   | 854   | 889   | 453   |
|             | 1024  | 1029  | 1048  | 469   |
|             | 1087  | 1088  | 1105  | 472   |
|             | 1102  | 1116  | 1135  | 496   |
|             | 1105  | 1122  | 1170  | 499   |
|             | 1109  | 1129  | 1183  | 532   |
|             | 1151  | 1188  | 1235  | 579   |
|             | 1197  | 1226  | 1270  | 581   |
|             | 1410  | 1408  | 1406  | 600   |
|             | 1412  | 1415  | 1413  | 601   |
|             | 1415  | 1423  | 1431  | 619   |
|             | 1422  | 1426  | 1434  | 640   |
|             | 1423  | 1430  | 1437  | 642   |
|             | 1432  | 1434  | 1440  | 652   |
|             | 1434  | 1435  | 1442  | 657   |
|             | 1438  | 1444  | 1449  | 724   |

|  |      |      |      |      |
|--|------|------|------|------|
|  | 1450 | 1447 | 1456 | 727  |
|  | 1456 | 1452 | 1459 | 729  |
|  | 2992 | 2988 | 2978 | 732  |
|  | 2996 | 2993 | 2984 | 736  |
|  | 3006 | 3027 | 3007 | 738  |
|  | 3011 | 3031 | 3011 | 750  |
|  | 3068 | 3056 | 3034 | 751  |
|  | 3075 | 3059 | 3037 | 796  |
|  | 3081 | 3077 | 3052 | 800  |
|  | 3087 | 3084 | 3070 | 862  |
|  | 3097 | 3093 | 3075 | 869  |
|  | 3099 | 3109 | 3082 | 875  |
|  | 3105 | 3117 | 3084 | 880  |
|  | 3122 | 3125 | 3088 | 940  |
|  | 3125 | 3132 | 3089 | 947  |
|  | 3208 | 3208 | 3215 | 951  |
|  | 3218 | 3221 | 3229 | 955  |
|  |      |      |      | 966  |
|  |      |      |      | 970  |
|  |      |      |      | 972  |
|  |      |      |      | 978  |
|  |      |      |      | 979  |
|  |      |      |      | 979  |
|  |      |      |      | 1021 |
|  |      |      |      | 1032 |
|  |      |      |      | 1042 |
|  |      |      |      | 1042 |
|  |      |      |      | 1059 |
|  |      |      |      | 1060 |
|  |      |      |      | 1068 |
|  |      |      |      | 1071 |
|  |      |      |      | 1072 |
|  |      |      |      | 1094 |
|  |      |      |      | 1116 |
|  |      |      |      | 1117 |
|  |      |      |      | 1120 |
|  |      |      |      | 1122 |
|  |      |      |      | 1137 |
|  |      |      |      | 1137 |
|  |      |      |      | 1142 |
|  |      |      |      | 1143 |
|  |      |      |      | 1144 |
|  |      |      |      | 1227 |
|  |      |      |      | 1228 |
|  |      |      |      | 1254 |
|  |      |      |      | 1256 |
|  |      |      |      | 1307 |

|           |                            |                            |                            |                                                                                                                                                                                                                                                                                                                                              |
|-----------|----------------------------|----------------------------|----------------------------|----------------------------------------------------------------------------------------------------------------------------------------------------------------------------------------------------------------------------------------------------------------------------------------------------------------------------------------------|
|           |                            |                            |                            | 1311<br>1324<br>1329<br>1348<br>1348<br>1378<br>1380<br>1431<br>1432<br>1442<br>1443<br>1461<br>1463<br>1499<br>1501<br>1613<br>1614<br>1619<br>1620<br>1636<br>1636<br>1643<br>1645<br>3090<br>3171<br>3172<br>3179<br>3180<br>3185<br>3187<br>3191<br>3196<br>3198<br>3199<br>3206<br>3209<br>3211<br>3215<br>3223<br>3234<br>3238<br>3244 |
| <b>11</b> | 23<br>63<br>67<br>89<br>99 | 35<br>55<br>63<br>78<br>80 | 38<br>50<br>60<br>75<br>88 | 31<br>41<br>42<br>53<br>65                                                                                                                                                                                                                                                                                                                   |

|  |      |      |      |     |
|--|------|------|------|-----|
|  | 119  | 93   | 95   | 76  |
|  | 129  | 112  | 106  | 87  |
|  | 142  | 124  | 120  | 96  |
|  | 184  | 170  | 154  | 107 |
|  | 237  | 188  | 187  | 123 |
|  | 247  | 203  | 192  | 125 |
|  | 250  | 209  | 198  | 137 |
|  | 263  | 219  | 217  | 159 |
|  | 270  | 234  | 227  | 164 |
|  | 281  | 239  | 247  | 173 |
|  | 297  | 266  | 258  | 186 |
|  | 319  | 302  | 324  | 203 |
|  | 468  | 460  | 476  | 213 |
|  | 498  | 478  | 522  | 216 |
|  | 509  | 498  | 543  | 234 |
|  | 529  | 502  | 544  | 276 |
|  | 577  | 574  | 602  | 279 |
|  | 583  | 588  | 611  | 293 |
|  | 585  | 603  | 622  | 308 |
|  | 645  | 638  | 672  | 335 |
|  | 680  | 677  | 719  | 364 |
|  | 689  | 705  | 765  | 369 |
|  | 702  | 749  | 795  | 418 |
|  | 773  | 759  | 830  | 419 |
|  | 802  | 793  | 861  | 444 |
|  | 821  | 840  | 875  | 455 |
|  | 830  | 847  | 885  | 469 |
|  | 847  | 855  | 899  | 473 |
|  | 1097 | 1118 | 1177 | 497 |
|  | 1106 | 1127 | 1184 | 498 |
|  | 1156 | 1187 | 1235 | 536 |
|  | 1201 | 1225 | 1269 | 551 |
|  | 1377 | 1379 | 1380 | 581 |
|  | 1411 | 1411 | 1406 | 581 |
|  | 1416 | 1422 | 1430 | 601 |
|  | 1417 | 1425 | 1432 | 601 |
|  | 1420 | 1428 | 1435 | 637 |
|  | 1429 | 1432 | 1438 | 641 |
|  | 1430 | 1433 | 1440 | 643 |
|  | 1437 | 1442 | 1446 | 652 |
|  | 1447 | 1445 | 1454 | 658 |
|  | 1454 | 1451 | 1457 | 726 |
|  | 2967 | 2976 | 2963 | 728 |
|  | 2986 | 2988 | 2974 | 731 |
|  | 3003 | 3021 | 3000 | 732 |
|  | 3009 | 3029 | 3006 | 738 |
|  | 3039 | 3045 | 3016 | 739 |

|  |      |      |      |      |
|--|------|------|------|------|
|  | 3042 | 3046 | 3023 | 750  |
|  | 3064 | 3051 | 3024 | 752  |
|  | 3087 | 3088 | 3059 | 800  |
|  | 3094 | 3102 | 3068 | 802  |
|  | 3098 | 3108 | 3074 | 841  |
|  | 3103 | 3116 | 3077 | 866  |
|  | 3119 | 3119 | 3084 | 869  |
|  | 3125 | 3131 | 3125 | 879  |
|  | 3270 | 3277 | 3292 | 881  |
|  | 3293 | 3296 | 3302 | 943  |
|  | 3856 | 3853 | 3846 | 945  |
|  |      |      |      | 954  |
|  |      |      |      | 956  |
|  |      |      |      | 967  |
|  |      |      |      | 973  |
|  |      |      |      | 976  |
|  |      |      |      | 979  |
|  |      |      |      | 979  |
|  |      |      |      | 982  |
|  |      |      |      | 1023 |
|  |      |      |      | 1035 |
|  |      |      |      | 1042 |
|  |      |      |      | 1042 |
|  |      |      |      | 1058 |
|  |      |      |      | 1061 |
|  |      |      |      | 1069 |
|  |      |      |      | 1072 |
|  |      |      |      | 1115 |
|  |      |      |      | 1116 |
|  |      |      |      | 1119 |
|  |      |      |      | 1123 |
|  |      |      |      | 1136 |
|  |      |      |      | 1138 |
|  |      |      |      | 1142 |
|  |      |      |      | 1143 |
|  |      |      |      | 1226 |
|  |      |      |      | 1229 |
|  |      |      |      | 1253 |
|  |      |      |      | 1257 |
|  |      |      |      | 1306 |
|  |      |      |      | 1309 |
|  |      |      |      | 1325 |
|  |      |      |      | 1330 |
|  |      |      |      | 1348 |
|  |      |      |      | 1350 |
|  |      |      |      | 1363 |
|  |      |      |      | 1366 |

|             |      |      |      |      |
|-------------|------|------|------|------|
|             |      |      |      | 1432 |
|             |      |      |      | 1432 |
|             |      |      |      | 1442 |
|             |      |      |      | 1443 |
|             |      |      |      | 1460 |
|             |      |      |      | 1464 |
|             |      |      |      | 1498 |
|             |      |      |      | 1500 |
|             |      |      |      | 1613 |
|             |      |      |      | 1614 |
|             |      |      |      | 1619 |
|             |      |      |      | 1621 |
|             |      |      |      | 1635 |
|             |      |      |      | 1636 |
|             |      |      |      | 1643 |
|             |      |      |      | 1645 |
|             |      |      |      | 3131 |
|             |      |      |      | 3164 |
|             |      |      |      | 3171 |
|             |      |      |      | 3179 |
|             |      |      |      | 3179 |
|             |      |      |      | 3184 |
|             |      |      |      | 3187 |
|             |      |      |      | 3190 |
|             |      |      |      | 3195 |
|             |      |      |      | 3197 |
|             |      |      |      | 3200 |
|             |      |      |      | 3206 |
|             |      |      |      | 3209 |
|             |      |      |      | 3211 |
|             |      |      |      | 3215 |
|             |      |      |      | 3222 |
|             |      |      |      | 3232 |
|             |      |      |      | 3326 |
|             |      |      |      | 3329 |
|             |      |      |      | 3859 |
| <b>TS1P</b> | -917 | -839 | -838 | -767 |
|             | 69   | 57   | 44   | 29   |
|             | 86   | 72   | 57   | 36   |
|             | 107  | 88   | 83   | 41   |
|             | 117  | 94   | 89   | 45   |
|             | 139  | 108  | 101  | 58   |
|             | 150  | 128  | 138  | 80   |
|             | 152  | 153  | 155  | 86   |
|             | 200  | 184  | 184  | 114  |
|             | 206  | 189  | 195  | 125  |
|             | 236  | 205  | 208  | 129  |

|  |      |      |      |     |
|--|------|------|------|-----|
|  | 247  | 212  | 217  | 138 |
|  | 269  | 219  | 226  | 160 |
|  | 283  | 251  | 239  | 181 |
|  | 315  | 257  | 264  | 186 |
|  | 406  | 386  | 402  | 197 |
|  | 461  | 448  | 470  | 211 |
|  | 494  | 485  | 531  | 225 |
|  | 504  | 495  | 536  | 271 |
|  | 555  | 568  | 604  | 280 |
|  | 560  | 575  | 611  | 289 |
|  | 624  | 607  | 654  | 295 |
|  | 640  | 642  | 678  | 329 |
|  | 664  | 664  | 717  | 359 |
|  | 669  | 693  | 746  | 366 |
|  | 680  | 706  | 755  | 415 |
|  | 712  | 729  | 797  | 418 |
|  | 735  | 748  | 808  | 435 |
|  | 755  | 785  | 836  | 448 |
|  | 758  | 794  | 841  | 453 |
|  | 824  | 837  | 877  | 466 |
|  | 873  | 847  | 895  | 470 |
|  | 901  | 904  | 944  | 497 |
|  | 1091 | 1114 | 1177 | 502 |
|  | 1104 | 1127 | 1189 | 563 |
|  | 1110 | 1143 | 1206 | 580 |
|  | 1169 | 1205 | 1257 | 582 |
|  | 1400 | 1402 | 1405 | 598 |
|  | 1408 | 1409 | 1412 | 600 |
|  | 1410 | 1420 | 1428 | 604 |
|  | 1417 | 1422 | 1430 | 632 |
|  | 1420 | 1427 | 1431 | 642 |
|  | 1429 | 1431 | 1434 | 650 |
|  | 1430 | 1431 | 1438 | 657 |
|  | 1435 | 1439 | 1447 | 696 |
|  | 1441 | 1440 | 1449 | 723 |
|  | 1452 | 1448 | 1453 | 725 |
|  | 2953 | 2967 | 2946 | 733 |
|  | 2983 | 2986 | 2971 | 734 |
|  | 2996 | 3015 | 2992 | 736 |
|  | 3012 | 3029 | 3002 | 737 |
|  | 3015 | 3037 | 3017 | 749 |
|  | 3047 | 3048 | 3023 | 750 |
|  | 3052 | 3049 | 3025 | 777 |
|  | 3068 | 3067 | 3036 | 801 |
|  | 3083 | 3090 | 3053 | 804 |
|  | 3108 | 3105 | 3056 | 858 |
|  | 3113 | 3126 | 3104 | 864 |

|  |      |      |      |      |
|--|------|------|------|------|
|  | 3128 | 3138 | 3108 | 867  |
|  | 3132 | 3148 | 3123 | 878  |
|  | 3271 | 3269 | 3264 | 879  |
|  | 3290 | 3287 | 3282 | 940  |
|  | 3814 | 3801 | 3776 | 942  |
|  |      |      |      | 954  |
|  |      |      |      | 957  |
|  |      |      |      | 963  |
|  |      |      |      | 971  |
|  |      |      |      | 975  |
|  |      |      |      | 977  |
|  |      |      |      | 981  |
|  |      |      |      | 983  |
|  |      |      |      | 1020 |
|  |      |      |      | 1033 |
|  |      |      |      | 1040 |
|  |      |      |      | 1042 |
|  |      |      |      | 1058 |
|  |      |      |      | 1062 |
|  |      |      |      | 1067 |
|  |      |      |      | 1073 |
|  |      |      |      | 1114 |
|  |      |      |      | 1116 |
|  |      |      |      | 1118 |
|  |      |      |      | 1121 |
|  |      |      |      | 1136 |
|  |      |      |      | 1138 |
|  |      |      |      | 1142 |
|  |      |      |      | 1143 |
|  |      |      |      | 1228 |
|  |      |      |      | 1229 |
|  |      |      |      | 1252 |
|  |      |      |      | 1255 |
|  |      |      |      | 1305 |
|  |      |      |      | 1307 |
|  |      |      |      | 1325 |
|  |      |      |      | 1327 |
|  |      |      |      | 1345 |
|  |      |      |      | 1348 |
|  |      |      |      | 1363 |
|  |      |      |      | 1372 |
|  |      |      |      | 1428 |
|  |      |      |      | 1432 |
|  |      |      |      | 1440 |
|  |      |      |      | 1440 |
|  |      |      |      | 1458 |
|  |      |      |      | 1462 |



|             |                                                                                                                      |                                                                                                                     |                                                                                                                     |                                                                                                                                                                                                                                              |
|-------------|----------------------------------------------------------------------------------------------------------------------|---------------------------------------------------------------------------------------------------------------------|---------------------------------------------------------------------------------------------------------------------|----------------------------------------------------------------------------------------------------------------------------------------------------------------------------------------------------------------------------------------------|
|             |                                                                                                                      |                                                                                                                     |                                                                                                                     | 1495<br>1496<br>1610<br>1612<br>1616<br>1617<br>1632<br>1634<br>1639<br>1642<br>3126<br>3133<br>3171<br>3175<br>3179<br>3181<br>3183<br>3186<br>3191<br>3193<br>3194<br>3206<br>3207<br>3208<br>3209<br>3216<br>3220<br>3305<br>3318<br>3837 |
| <b>TS2R</b> | -1659<br>57<br>126<br>137<br>154<br>165<br>194<br>199<br>214<br>250<br>258<br>262<br>285<br>308<br>319<br>393<br>477 | -1627<br>41<br>50<br>114<br>123<br>126<br>150<br>169<br>175<br>203<br>209<br>240<br>249<br>274<br>294<br>354<br>451 | -1729<br>66<br>79<br>115<br>135<br>138<br>151<br>174<br>191<br>209<br>214<br>241<br>255<br>263<br>306<br>435<br>476 | -1503<br>35<br>38<br>41<br>74<br>82<br>94<br>107<br>125<br>126<br>131<br>165<br>191<br>196<br>203<br>206<br>235                                                                                                                              |

|  |      |      |      |     |
|--|------|------|------|-----|
|  | 484  | 492  | 530  | 263 |
|  | 542  | 512  | 541  | 276 |
|  | 545  | 524  | 569  | 289 |
|  | 557  | 560  | 573  | 291 |
|  | 572  | 574  | 599  | 331 |
|  | 611  | 594  | 608  | 334 |
|  | 678  | 669  | 730  | 362 |
|  | 725  | 713  | 765  | 368 |
|  | 737  | 738  | 788  | 373 |
|  | 754  | 764  | 812  | 419 |
|  | 770  | 789  | 843  | 419 |
|  | 807  | 821  | 854  | 455 |
|  | 820  | 830  | 860  | 458 |
|  | 831  | 839  | 878  | 467 |
|  | 1043 | 979  | 1096 | 472 |
|  | 1083 | 1101 | 1162 | 494 |
|  | 1111 | 1126 | 1166 | 503 |
|  | 1133 | 1140 | 1182 | 510 |
|  | 1152 | 1181 | 1235 | 540 |
|  | 1197 | 1213 | 1256 | 582 |
|  | 1419 | 1422 | 1427 | 582 |
|  | 1422 | 1428 | 1435 | 602 |
|  | 1427 | 1430 | 1437 | 603 |
|  | 1429 | 1430 | 1439 | 632 |
|  | 1433 | 1432 | 1442 | 641 |
|  | 1440 | 1437 | 1445 | 643 |
|  | 1442 | 1439 | 1447 | 653 |
|  | 1447 | 1444 | 1453 | 658 |
|  | 1450 | 1449 | 1454 | 729 |
|  | 1455 | 1453 | 1460 | 730 |
|  | 1719 | 1684 | 1719 | 735 |
|  | 3003 | 3006 | 2997 | 737 |
|  | 3013 | 3013 | 3004 | 740 |
|  | 3016 | 3015 | 3006 | 742 |
|  | 3018 | 3021 | 3011 | 750 |
|  | 3034 | 3030 | 3015 | 751 |
|  | 3073 | 3082 | 3053 | 802 |
|  | 3089 | 3087 | 3066 | 805 |
|  | 3096 | 3092 | 3071 | 867 |
|  | 3105 | 3095 | 3072 | 870 |
|  | 3107 | 3099 | 3081 | 875 |
|  | 3116 | 3104 | 3085 | 882 |
|  | 3118 | 3106 | 3089 | 884 |
|  | 3127 | 3109 | 3091 | 946 |
|  | 3134 | 3120 | 3094 | 949 |
|  | 3143 | 3126 | 3097 | 958 |
|  |      |      |      | 960 |

|  |  |  |  |      |
|--|--|--|--|------|
|  |  |  |  | 971  |
|  |  |  |  | 974  |
|  |  |  |  | 976  |
|  |  |  |  | 979  |
|  |  |  |  | 982  |
|  |  |  |  | 985  |
|  |  |  |  | 1025 |
|  |  |  |  | 1033 |
|  |  |  |  | 1043 |
|  |  |  |  | 1045 |
|  |  |  |  | 1061 |
|  |  |  |  | 1064 |
|  |  |  |  | 1074 |
|  |  |  |  | 1076 |
|  |  |  |  | 1116 |
|  |  |  |  | 1118 |
|  |  |  |  | 1121 |
|  |  |  |  | 1123 |
|  |  |  |  | 1138 |
|  |  |  |  | 1140 |
|  |  |  |  | 1144 |
|  |  |  |  | 1145 |
|  |  |  |  | 1149 |
|  |  |  |  | 1232 |
|  |  |  |  | 1235 |
|  |  |  |  | 1256 |
|  |  |  |  | 1259 |
|  |  |  |  | 1308 |
|  |  |  |  | 1309 |
|  |  |  |  | 1325 |
|  |  |  |  | 1328 |
|  |  |  |  | 1346 |
|  |  |  |  | 1347 |
|  |  |  |  | 1403 |
|  |  |  |  | 1413 |
|  |  |  |  | 1432 |
|  |  |  |  | 1435 |
|  |  |  |  | 1442 |
|  |  |  |  | 1443 |
|  |  |  |  | 1463 |
|  |  |  |  | 1467 |
|  |  |  |  | 1500 |
|  |  |  |  | 1500 |
|  |  |  |  | 1614 |
|  |  |  |  | 1616 |
|  |  |  |  | 1621 |
|  |  |  |  | 1622 |

|           |                                                                                                                                                              |                                                                                                                                                             |                                                                                                                                                             |                                                                                                                                                                                              |
|-----------|--------------------------------------------------------------------------------------------------------------------------------------------------------------|-------------------------------------------------------------------------------------------------------------------------------------------------------------|-------------------------------------------------------------------------------------------------------------------------------------------------------------|----------------------------------------------------------------------------------------------------------------------------------------------------------------------------------------------|
|           |                                                                                                                                                              |                                                                                                                                                             |                                                                                                                                                             | 1635<br>1636<br>1643<br>1645<br>1682<br>3033<br>3116<br>3149<br>3174<br>3174<br>3181<br>3181<br>3184<br>3185<br>3192<br>3193<br>3195<br>3196<br>3208<br>3209<br>3210<br>3211<br>3220<br>3223 |
| <b>12</b> | 76<br>126<br>156<br>184<br>198<br>220<br>227<br>248<br>255<br>271<br>272<br>286<br>293<br>314<br>322<br>381<br>434<br>452<br>460<br>497<br>549<br>589<br>665 | 46<br>63<br>106<br>142<br>145<br>153<br>181<br>182<br>195<br>207<br>222<br>235<br>248<br>259<br>270<br>364<br>413<br>463<br>470<br>482<br>550<br>610<br>667 | 73<br>88<br>105<br>125<br>133<br>177<br>203<br>213<br>224<br>229<br>237<br>243<br>244<br>336<br>434<br>454<br>478<br>516<br>526<br>542<br>581<br>715<br>719 | 35<br>43<br>47<br>81<br>84<br>94<br>118<br>122<br>132<br>151<br>165<br>177<br>189<br>190<br>213<br>225<br>241<br>273<br>287<br>288<br>303<br>329<br>342                                      |

|  |      |      |      |     |
|--|------|------|------|-----|
|  | 690  | 681  | 736  | 365 |
|  | 700  | 711  | 762  | 378 |
|  | 734  | 720  | 783  | 416 |
|  | 749  | 731  | 794  | 417 |
|  | 760  | 744  | 799  | 429 |
|  | 778  | 749  | 806  | 450 |
|  | 792  | 776  | 844  | 461 |
|  | 800  | 790  | 887  | 466 |
|  | 824  | 822  | 895  | 474 |
|  | 985  | 952  | 1122 | 495 |
|  | 1062 | 1062 | 1136 | 507 |
|  | 1078 | 1087 | 1179 | 522 |
|  | 1105 | 1107 | 1187 | 580 |
|  | 1186 | 1194 | 1257 | 583 |
|  | 1413 | 1410 | 1421 | 599 |
|  | 1416 | 1413 | 1424 | 603 |
|  | 1417 | 1418 | 1428 | 624 |
|  | 1425 | 1422 | 1432 | 642 |
|  | 1427 | 1425 | 1438 | 645 |
|  | 1431 | 1427 | 1441 | 655 |
|  | 1432 | 1431 | 1445 | 658 |
|  | 1443 | 1439 | 1446 | 706 |
|  | 1444 | 1442 | 1452 | 723 |
|  | 1452 | 1448 | 1465 | 731 |
|  | 2999 | 3003 | 2971 | 733 |
|  | 3021 | 3020 | 2979 | 737 |
|  | 3028 | 3032 | 3001 | 738 |
|  | 3031 | 3039 | 3029 | 742 |
|  | 3038 | 3041 | 3031 | 749 |
|  | 3069 | 3070 | 3033 | 751 |
|  | 3078 | 3079 | 3035 | 798 |
|  | 3119 | 3116 | 3041 | 806 |
|  | 3129 | 3128 | 3064 | 827 |
|  | 3130 | 3129 | 3067 | 863 |
|  | 3137 | 3139 | 3073 | 870 |
|  | 3140 | 3144 | 3127 | 877 |
|  | 3146 | 3151 | 3128 | 884 |
|  | 3166 | 3158 | 3137 | 944 |
|  | 3172 | 3173 | 3138 | 948 |
|  | 3856 | 3854 | 3838 | 952 |
|  |      |      |      | 954 |
|  |      |      |      | 958 |
|  |      |      |      | 976 |
|  |      |      |      | 978 |
|  |      |      |      | 978 |
|  |      |      |      | 979 |
|  |      |      |      | 987 |

|  |  |  |  |      |
|--|--|--|--|------|
|  |  |  |  | 1007 |
|  |  |  |  | 1017 |
|  |  |  |  | 1034 |
|  |  |  |  | 1041 |
|  |  |  |  | 1042 |
|  |  |  |  | 1058 |
|  |  |  |  | 1061 |
|  |  |  |  | 1070 |
|  |  |  |  | 1071 |
|  |  |  |  | 1114 |
|  |  |  |  | 1117 |
|  |  |  |  | 1119 |
|  |  |  |  | 1120 |
|  |  |  |  | 1136 |
|  |  |  |  | 1139 |
|  |  |  |  | 1141 |
|  |  |  |  | 1143 |
|  |  |  |  | 1229 |
|  |  |  |  | 1229 |
|  |  |  |  | 1255 |
|  |  |  |  | 1256 |
|  |  |  |  | 1306 |
|  |  |  |  | 1308 |
|  |  |  |  | 1326 |
|  |  |  |  | 1330 |
|  |  |  |  | 1346 |
|  |  |  |  | 1348 |
|  |  |  |  | 1393 |
|  |  |  |  | 1397 |
|  |  |  |  | 1428 |
|  |  |  |  | 1432 |
|  |  |  |  | 1440 |
|  |  |  |  | 1443 |
|  |  |  |  | 1461 |
|  |  |  |  | 1463 |
|  |  |  |  | 1496 |
|  |  |  |  | 1498 |
|  |  |  |  | 1610 |
|  |  |  |  | 1612 |
|  |  |  |  | 1616 |
|  |  |  |  | 1620 |
|  |  |  |  | 1634 |
|  |  |  |  | 1636 |
|  |  |  |  | 1641 |
|  |  |  |  | 1644 |
|  |  |  |  | 3089 |
|  |  |  |  | 3165 |

|             |                                                                                                                                                                                                         |                                                                                                                                                                                                        |                                                                                                                                                                                                      |                                                                                                                                                                                                    |
|-------------|---------------------------------------------------------------------------------------------------------------------------------------------------------------------------------------------------------|--------------------------------------------------------------------------------------------------------------------------------------------------------------------------------------------------------|------------------------------------------------------------------------------------------------------------------------------------------------------------------------------------------------------|----------------------------------------------------------------------------------------------------------------------------------------------------------------------------------------------------|
|             |                                                                                                                                                                                                         |                                                                                                                                                                                                        |                                                                                                                                                                                                      | 3171<br>3178<br>3178<br>3182<br>3184<br>3188<br>3190<br>3196<br>3197<br>3201<br>3206<br>3208<br>3211<br>3212<br>3221<br>3244<br>3248<br>3863                                                       |
| <b>TS2P</b> | -765<br>67<br>113<br>142<br>149<br>162<br>173<br>210<br>232<br>249<br>254<br>273<br>292<br>295<br>322<br>417<br>449<br>461<br>494<br>556<br>593<br>647<br>659<br>682<br>695<br>716<br>729<br>753<br>767 | -842<br>80<br>92<br>102<br>116<br>140<br>147<br>155<br>175<br>186<br>192<br>200<br>222<br>246<br>264<br>389<br>432<br>440<br>486<br>554<br>598<br>633<br>672<br>676<br>696<br>710<br>720<br>734<br>771 | -941<br>67<br>82<br>93<br>95<br>134<br>139<br>145<br>184<br>195<br>196<br>201<br>219<br>237<br>245<br>402<br>464<br>474<br>535<br>604<br>647<br>661<br>684<br>731<br>759<br>771<br>777<br>789<br>806 | -768<br>32<br>37<br>38<br>60<br>83<br>86<br>114<br>124<br>135<br>155<br>166<br>186<br>194<br>197<br>219<br>226<br>260<br>266<br>285<br>288<br>306<br>325<br>356<br>366<br>413<br>419<br>433<br>447 |

|  |      |      |      |      |
|--|------|------|------|------|
|  | 815  | 806  | 831  | 452  |
|  | 841  | 825  | 878  | 462  |
|  | 968  | 970  | 922  | 472  |
|  | 1028 | 1060 | 1104 | 499  |
|  | 1113 | 1121 | 1158 | 503  |
|  | 1135 | 1125 | 1183 | 581  |
|  | 1144 | 1128 | 1186 | 583  |
|  | 1173 | 1191 | 1253 | 601  |
|  | 1405 | 1399 | 1400 | 602  |
|  | 1409 | 1415 | 1423 | 624  |
|  | 1415 | 1421 | 1425 | 642  |
|  | 1415 | 1423 | 1429 | 645  |
|  | 1423 | 1427 | 1433 | 656  |
|  | 1426 | 1431 | 1437 | 688  |
|  | 1438 | 1435 | 1442 | 721  |
|  | 1441 | 1439 | 1445 | 725  |
|  | 1444 | 1440 | 1447 | 734  |
|  | 1452 | 1447 | 1453 | 735  |
|  | 2921 | 2958 | 2943 | 736  |
|  | 2966 | 2973 | 2961 | 737  |
|  | 2972 | 3005 | 2989 | 745  |
|  | 2992 | 3011 | 2993 | 751  |
|  | 3010 | 3022 | 3002 | 752  |
|  | 3012 | 3032 | 3010 | 802  |
|  | 3040 | 3038 | 3022 | 803  |
|  | 3055 | 3051 | 3031 | 806  |
|  | 3063 | 3061 | 3046 | 866  |
|  | 3072 | 3081 | 3053 | 869  |
|  | 3097 | 3105 | 3079 | 878  |
|  | 3114 | 3127 | 3095 | 879  |
|  | 3120 | 3135 | 3098 | 942  |
|  | 3160 | 3145 | 3150 | 945  |
|  | 3243 | 3254 | 3256 | 952  |
|  | 3816 | 3791 | 3754 | 955  |
|  |      |      |      | 956  |
|  |      |      |      | 959  |
|  |      |      |      | 975  |
|  |      |      |      | 976  |
|  |      |      |      | 977  |
|  |      |      |      | 977  |
|  |      |      |      | 980  |
|  |      |      |      | 1015 |
|  |      |      |      | 1034 |
|  |      |      |      | 1038 |
|  |      |      |      | 1041 |
|  |      |      |      | 1058 |
|  |      |      |      | 1062 |



|  |  |  |  |      |
|--|--|--|--|------|
|  |  |  |  | 1070 |
|  |  |  |  | 1072 |
|  |  |  |  | 1111 |
|  |  |  |  | 1115 |
|  |  |  |  | 1117 |
|  |  |  |  | 1119 |
|  |  |  |  | 1132 |
|  |  |  |  | 1136 |
|  |  |  |  | 1138 |
|  |  |  |  | 1141 |
|  |  |  |  | 1144 |
|  |  |  |  | 1227 |
|  |  |  |  | 1234 |
|  |  |  |  | 1254 |
|  |  |  |  | 1259 |
|  |  |  |  | 1300 |
|  |  |  |  | 1306 |
|  |  |  |  | 1323 |
|  |  |  |  | 1327 |
|  |  |  |  | 1343 |
|  |  |  |  | 1347 |
|  |  |  |  | 1380 |
|  |  |  |  | 1400 |
|  |  |  |  | 1427 |
|  |  |  |  | 1430 |
|  |  |  |  | 1438 |
|  |  |  |  | 1441 |
|  |  |  |  | 1459 |
|  |  |  |  | 1461 |
|  |  |  |  | 1490 |
|  |  |  |  | 1496 |
|  |  |  |  | 1609 |
|  |  |  |  | 1611 |
|  |  |  |  | 1615 |
|  |  |  |  | 1618 |
|  |  |  |  | 1631 |
|  |  |  |  | 1632 |
|  |  |  |  | 1637 |
|  |  |  |  | 1640 |
|  |  |  |  | 3056 |
|  |  |  |  | 3150 |
|  |  |  |  | 3167 |
|  |  |  |  | 3174 |
|  |  |  |  | 3174 |
|  |  |  |  | 3177 |
|  |  |  |  | 3178 |
|  |  |  |  | 3184 |

|          |                                                                                                                                                                                                                                                       |                                                                                                                                                                                                                                                      |                                                                                                                                                                                                                                                      |                                                                                                                                                                                                                                           |
|----------|-------------------------------------------------------------------------------------------------------------------------------------------------------------------------------------------------------------------------------------------------------|------------------------------------------------------------------------------------------------------------------------------------------------------------------------------------------------------------------------------------------------------|------------------------------------------------------------------------------------------------------------------------------------------------------------------------------------------------------------------------------------------------------|-------------------------------------------------------------------------------------------------------------------------------------------------------------------------------------------------------------------------------------------|
|          |                                                                                                                                                                                                                                                       |                                                                                                                                                                                                                                                      |                                                                                                                                                                                                                                                      | 3186<br>3189<br>3189<br>3191<br>3197<br>3204<br>3206<br>3206<br>3209<br>3215<br>3287<br>3801                                                                                                                                              |
| <b>P</b> | 46<br>57<br>83<br>107<br>130<br>145<br>153<br>157<br>190<br>198<br>211<br>228<br>239<br>279<br>293<br>451<br>480<br>486<br>512<br>536<br>555<br>580<br>625<br>655<br>669<br>728<br>734<br>756<br>1082<br>1088<br>1090<br>1117<br>1124<br>1136<br>1167 | 39<br>56<br>74<br>80<br>106<br>119<br>130<br>139<br>146<br>158<br>175<br>178<br>189<br>192<br>215<br>439<br>462<br>479<br>494<br>524<br>538<br>589<br>600<br>661<br>684<br>711<br>719<br>722<br>1038<br>1058<br>1081<br>1124<br>1127<br>1136<br>1170 | 32<br>57<br>71<br>87<br>102<br>120<br>127<br>143<br>149<br>166<br>169<br>183<br>188<br>197<br>209<br>463<br>501<br>529<br>535<br>544<br>571<br>649<br>683<br>722<br>748<br>776<br>776<br>786<br>1080<br>1124<br>1126<br>1134<br>1169<br>1180<br>1188 | 31<br>32<br>39<br>45<br>47<br>80<br>90<br>93<br>110<br>117<br>134<br>145<br>152<br>158<br>161<br>185<br>195<br>213<br>245<br>251<br>283<br>286<br>317<br>351<br>359<br>411<br>418<br>423<br>438<br>456<br>459<br>466<br>476<br>496<br>581 |

|  |      |      |      |      |
|--|------|------|------|------|
|  | 1382 | 1388 | 1390 | 586  |
|  | 1406 | 1400 | 1401 | 600  |
|  | 1409 | 1401 | 1404 | 602  |
|  | 1427 | 1425 | 1431 | 629  |
|  | 1431 | 1426 | 1433 | 636  |
|  | 1434 | 1431 | 1436 | 646  |
|  | 1440 | 1436 | 1440 | 652  |
|  | 1443 | 1437 | 1443 | 721  |
|  | 1453 | 1445 | 1445 | 727  |
|  | 1460 | 1455 | 1455 | 727  |
|  | 1482 | 1469 | 1469 | 734  |
|  | 1491 | 1496 | 1496 | 738  |
|  | 2964 | 2963 | 2961 | 740  |
|  | 2976 | 2974 | 2966 | 747  |
|  | 2979 | 3010 | 2989 | 748  |
|  | 2985 | 3016 | 2994 | 805  |
|  | 3020 | 3019 | 3010 | 810  |
|  | 3022 | 3022 | 3011 | 871  |
|  | 3035 | 3032 | 3011 | 875  |
|  | 3054 | 3035 | 3014 | 883  |
|  | 3058 | 3038 | 3019 | 892  |
|  | 3060 | 3053 | 3054 | 948  |
|  | 3065 | 3100 | 3075 | 953  |
|  | 3069 | 3112 | 3078 | 960  |
|  | 3096 | 3114 | 3099 | 961  |
|  | 3098 | 3147 | 3110 | 965  |
|  | 3103 | 3150 | 3114 | 969  |
|  | 3717 | 3665 | 3660 | 978  |
|  |      |      |      | 982  |
|  |      |      |      | 984  |
|  |      |      |      | 991  |
|  |      |      |      | 1014 |
|  |      |      |      | 1023 |
|  |      |      |      | 1037 |
|  |      |      |      | 1039 |
|  |      |      |      | 1051 |
|  |      |      |      | 1058 |
|  |      |      |      | 1061 |
|  |      |      |      | 1067 |
|  |      |      |      | 1068 |
|  |      |      |      | 1108 |
|  |      |      |      | 1110 |
|  |      |      |      | 1114 |
|  |      |      |      | 1115 |
|  |      |      |      | 1117 |
|  |      |      |      | 1137 |
|  |      |      |      | 1137 |

|  |  |  |  |      |
|--|--|--|--|------|
|  |  |  |  | 1142 |
|  |  |  |  | 1143 |
|  |  |  |  | 1146 |
|  |  |  |  | 1225 |
|  |  |  |  | 1229 |
|  |  |  |  | 1251 |
|  |  |  |  | 1255 |
|  |  |  |  | 1302 |
|  |  |  |  | 1303 |
|  |  |  |  | 1317 |
|  |  |  |  | 1318 |
|  |  |  |  | 1340 |
|  |  |  |  | 1343 |
|  |  |  |  | 1344 |
|  |  |  |  | 1425 |
|  |  |  |  | 1426 |
|  |  |  |  | 1427 |
|  |  |  |  | 1435 |
|  |  |  |  | 1436 |
|  |  |  |  | 1444 |
|  |  |  |  | 1450 |
|  |  |  |  | 1453 |
|  |  |  |  | 1457 |
|  |  |  |  | 1489 |
|  |  |  |  | 1493 |
|  |  |  |  | 1608 |
|  |  |  |  | 1609 |
|  |  |  |  | 1613 |
|  |  |  |  | 1614 |
|  |  |  |  | 1625 |
|  |  |  |  | 1626 |
|  |  |  |  | 1638 |
|  |  |  |  | 1638 |
|  |  |  |  | 3013 |
|  |  |  |  | 3090 |
|  |  |  |  | 3150 |
|  |  |  |  | 3158 |
|  |  |  |  | 3160 |
|  |  |  |  | 3174 |
|  |  |  |  | 3176 |
|  |  |  |  | 3180 |
|  |  |  |  | 3184 |
|  |  |  |  | 3186 |
|  |  |  |  | 3187 |
|  |  |  |  | 3191 |
|  |  |  |  | 3196 |
|  |  |  |  | 3206 |

|             |      |      |      |      |
|-------------|------|------|------|------|
|             |      |      |      | 3207 |
|             |      |      |      | 3208 |
|             |      |      |      | 3212 |
|             |      |      |      | 3219 |
|             |      |      |      | 3221 |
|             |      |      |      | 3812 |
| <b>TSOR</b> | 42   | 27   | 31   | 13   |
|             | 46   | 38   | 61   | 17   |
|             | 51   | 50   | 75   | 29   |
|             | 78   | 80   | 81   | 34   |
|             | 94   | 88   | 117  | 41   |
|             | 126  | 104  | 128  | 46   |
|             | 148  | 119  | 156  | 72   |
|             | 157  | 137  | 187  | 86   |
|             | 184  | 141  | 214  | 97   |
|             | 189  | 144  | 222  | 103  |
|             | 196  | 173  | 234  | 115  |
|             | 204  | 180  | 247  | 143  |
|             | 239  | 188  | 264  | 152  |
|             | 261  | 190  | 314  | 161  |
|             | 456  | 453  | 335  | 183  |
|             | 486  | 463  | 488  | 195  |
|             | 500  | 479  | 541  | 212  |
|             | 509  | 493  | 586  | 244  |
|             | 550  | 517  | 610  | 250  |
|             | 565  | 585  | 626  | 282  |
|             | 608  | 587  | 653  | 286  |
|             | 629  | 608  | 663  | 316  |
|             | 629  | 629  | 743  | 351  |
|             | 638  | 657  | 765  | 359  |
|             | 653  | 682  | 812  | 416  |
|             | 721  | 707  | 835  | 422  |
|             | 722  | 716  | 878  | 435  |
|             | 744  | 719  | 895  | 454  |
|             | 1078 | 1032 | 899  | 457  |
|             | 1083 | 1051 | 1184 | 464  |
|             | 1105 | 1117 | 1197 | 478  |
|             | 1115 | 1120 | 1242 | 496  |
|             | 1356 | 1356 | 1279 | 580  |
|             | 1409 | 1399 | 1430 | 586  |
|             | 1410 | 1400 | 1432 | 592  |
|             | 1422 | 1424 | 1434 | 600  |
|             | 1425 | 1425 | 1435 | 601  |
|             | 1430 | 1431 | 1440 | 602  |
|             | 1431 | 1434 | 1449 | 628  |
|             | 1439 | 1436 | 1453 | 635  |
|             | 1441 | 1440 | 1459 | 645  |

|  |      |      |      |      |
|--|------|------|------|------|
|  | 2394 | 2399 | 1840 | 651  |
|  | 2966 | 2960 | 2976 | 720  |
|  | 2970 | 2969 | 2981 | 725  |
|  | 2989 | 3013 | 3014 | 727  |
|  | 2995 | 3016 | 3021 | 733  |
|  | 3026 | 3017 | 3033 | 736  |
|  | 3027 | 3027 | 3038 | 739  |
|  | 3052 | 3030 | 3053 | 748  |
|  | 3053 | 3030 | 3060 | 748  |
|  | 3065 | 3108 | 3085 | 804  |
|  | 3068 | 3111 | 3094 | 810  |
|  | 3091 | 3145 | 3096 | 868  |
|  | 3093 | 3146 | 3103 | 872  |
|  |      |      |      | 881  |
|  |      |      |      | 889  |
|  |      |      |      | 944  |
|  |      |      |      | 951  |
|  |      |      |      | 958  |
|  |      |      |      | 960  |
|  |      |      |      | 964  |
|  |      |      |      | 966  |
|  |      |      |      | 974  |
|  |      |      |      | 978  |
|  |      |      |      | 984  |
|  |      |      |      | 986  |
|  |      |      |      | 1014 |
|  |      |      |      | 1022 |
|  |      |      |      | 1038 |
|  |      |      |      | 1038 |
|  |      |      |      | 1057 |
|  |      |      |      | 1060 |
|  |      |      |      | 1066 |
|  |      |      |      | 1066 |
|  |      |      |      | 1108 |
|  |      |      |      | 1114 |
|  |      |      |      | 1114 |
|  |      |      |      | 1117 |
|  |      |      |      | 1136 |
|  |      |      |      | 1136 |
|  |      |      |      | 1142 |
|  |      |      |      | 1142 |
|  |      |      |      | 1223 |
|  |      |      |      | 1227 |
|  |      |      |      | 1248 |
|  |      |      |      | 1252 |
|  |      |      |      | 1302 |
|  |      |      |      | 1303 |

|            |      |      |      |      |
|------------|------|------|------|------|
|            |      |      |      | 1316 |
|            |      |      |      | 1319 |
|            |      |      |      | 1343 |
|            |      |      |      | 1344 |
|            |      |      |      | 1360 |
|            |      |      |      | 1424 |
|            |      |      |      | 1426 |
|            |      |      |      | 1434 |
|            |      |      |      | 1436 |
|            |      |      |      | 1452 |
|            |      |      |      | 1455 |
|            |      |      |      | 1491 |
|            |      |      |      | 1492 |
|            |      |      |      | 1608 |
|            |      |      |      | 1609 |
|            |      |      |      | 1612 |
|            |      |      |      | 1614 |
|            |      |      |      | 1626 |
|            |      |      |      | 1627 |
|            |      |      |      | 1638 |
|            |      |      |      | 1638 |
|            |      |      |      | 2404 |
|            |      |      |      | 3158 |
|            |      |      |      | 3160 |
|            |      |      |      | 3174 |
|            |      |      |      | 3176 |
|            |      |      |      | 3179 |
|            |      |      |      | 3180 |
|            |      |      |      | 3185 |
|            |      |      |      | 3186 |
|            |      |      |      | 3191 |
|            |      |      |      | 3192 |
|            |      |      |      | 3205 |
|            |      |      |      | 3206 |
|            |      |      |      | 3207 |
|            |      |      |      | 3208 |
|            |      |      |      | 3220 |
|            |      |      |      | 3222 |
| <b>TSO</b> | -645 | -639 | -528 | -597 |
|            | 53   | 25   | 39   | 25   |
|            | 73   | 55   | 58   | 41   |
|            | 87   | 77   | 72   | 46   |
|            | 131  | 92   | 80   | 50   |
|            | 139  | 112  | 116  | 61   |
|            | 141  | 126  | 132  | 82   |
|            | 182  | 146  | 163  | 87   |
|            | 238  | 188  | 189  | 98   |

|  |      |      |      |     |
|--|------|------|------|-----|
|  | 254  | 209  | 217  | 118 |
|  | 257  | 229  | 226  | 125 |
|  | 274  | 234  | 236  | 137 |
|  | 292  | 240  | 253  | 165 |
|  | 293  | 274  | 267  | 175 |
|  | 330  | 294  | 318  | 184 |
|  | 349  | 318  | 335  | 204 |
|  | 490  | 474  | 487  | 212 |
|  | 519  | 496  | 540  | 232 |
|  | 574  | 577  | 608  | 264 |
|  | 583  | 581  | 615  | 278 |
|  | 588  | 593  | 631  | 289 |
|  | 614  | 598  | 658  | 293 |
|  | 691  | 699  | 743  | 337 |
|  | 695  | 712  | 765  | 351 |
|  | 723  | 757  | 811  | 364 |
|  | 784  | 769  | 834  | 371 |
|  | 806  | 844  | 877  | 417 |
|  | 840  | 853  | 893  | 418 |
|  | 851  | 858  | 897  | 445 |
|  | 1111 | 1127 | 1182 | 453 |
|  | 1122 | 1139 | 1194 | 468 |
|  | 1160 | 1192 | 1241 | 472 |
|  | 1208 | 1231 | 1277 | 495 |
|  | 1411 | 1423 | 1430 | 498 |
|  | 1419 | 1424 | 1433 | 579 |
|  | 1423 | 1427 | 1435 | 580 |
|  | 1429 | 1429 | 1436 | 598 |
|  | 1434 | 1434 | 1441 | 601 |
|  | 1435 | 1443 | 1449 | 603 |
|  | 1451 | 1445 | 1454 | 640 |
|  | 1457 | 1453 | 1459 | 641 |
|  | 1955 | 1960 | 1918 | 652 |
|  | 2992 | 2989 | 2977 | 657 |
|  | 2997 | 2994 | 2982 | 724 |
|  | 3009 | 3029 | 3013 | 727 |
|  | 3014 | 3040 | 3018 | 730 |
|  | 3070 | 3056 | 3035 | 731 |
|  | 3072 | 3063 | 3038 | 738 |
|  | 3085 | 3079 | 3053 | 739 |
|  | 3090 | 3088 | 3062 | 750 |
|  | 3105 | 3113 | 3084 | 751 |
|  | 3112 | 3129 | 3092 | 796 |
|  | 3133 | 3131 | 3093 | 800 |
|  | 3136 | 3145 | 3100 | 865 |
|  |      |      |      | 869 |
|  |      |      |      | 878 |



|  |  |  |  |      |
|--|--|--|--|------|
|  |  |  |  | 880  |
|  |  |  |  | 946  |
|  |  |  |  | 947  |
|  |  |  |  | 952  |
|  |  |  |  | 956  |
|  |  |  |  | 963  |
|  |  |  |  | 970  |
|  |  |  |  | 980  |
|  |  |  |  | 980  |
|  |  |  |  | 981  |
|  |  |  |  | 982  |
|  |  |  |  | 1020 |
|  |  |  |  | 1032 |
|  |  |  |  | 1043 |
|  |  |  |  | 1043 |
|  |  |  |  | 1061 |
|  |  |  |  | 1062 |
|  |  |  |  | 1072 |
|  |  |  |  | 1073 |
|  |  |  |  | 1117 |
|  |  |  |  | 1118 |
|  |  |  |  | 1121 |
|  |  |  |  | 1123 |
|  |  |  |  | 1138 |
|  |  |  |  | 1139 |
|  |  |  |  | 1144 |
|  |  |  |  | 1145 |
|  |  |  |  | 1229 |
|  |  |  |  | 1231 |
|  |  |  |  | 1256 |
|  |  |  |  | 1258 |
|  |  |  |  | 1308 |
|  |  |  |  | 1312 |
|  |  |  |  | 1324 |
|  |  |  |  | 1329 |
|  |  |  |  | 1348 |
|  |  |  |  | 1349 |
|  |  |  |  | 1433 |
|  |  |  |  | 1434 |
|  |  |  |  | 1443 |
|  |  |  |  | 1444 |
|  |  |  |  | 1462 |
|  |  |  |  | 1465 |
|  |  |  |  | 1500 |
|  |  |  |  | 1503 |
|  |  |  |  | 1614 |
|  |  |  |  | 1616 |

|             |                                                                                                                                                                |                                                                                                                                                                |                                                                                                                                                               |                                                                                                                                                                                      |
|-------------|----------------------------------------------------------------------------------------------------------------------------------------------------------------|----------------------------------------------------------------------------------------------------------------------------------------------------------------|---------------------------------------------------------------------------------------------------------------------------------------------------------------|--------------------------------------------------------------------------------------------------------------------------------------------------------------------------------------|
|             |                                                                                                                                                                |                                                                                                                                                                |                                                                                                                                                               | 1620<br>1621<br>1636<br>1637<br>1644<br>1646<br>1955<br>3175<br>3175<br>3182<br>3183<br>3188<br>3189<br>3195<br>3198<br>3200<br>3202<br>3209<br>3210<br>3215<br>3217<br>3231<br>3238 |
| <b>TSOP</b> | 17<br>30<br>66<br>69<br>76<br>99<br>115<br>139<br>146<br>222<br>232<br>237<br>258<br>271<br>291<br>314<br>478<br>509<br>550<br>577<br>591<br>625<br>689<br>705 | 38<br>45<br>51<br>72<br>77<br>93<br>101<br>108<br>139<br>185<br>188<br>217<br>227<br>250<br>288<br>307<br>467<br>485<br>519<br>568<br>572<br>642<br>699<br>729 | 33<br>44<br>51<br>71<br>77<br>82<br>91<br>127<br>139<br>194<br>196<br>225<br>235<br>248<br>288<br>326<br>478<br>533<br>561<br>585<br>638<br>708<br>753<br>786 | 9<br>24<br>35<br>39<br>44<br>53<br>75<br>84<br>86<br>87<br>93<br>121<br>129<br>153<br>163<br>181<br>202<br>204<br>234<br>271<br>276<br>292<br>303<br>335                             |

|  |      |      |      |      |
|--|------|------|------|------|
|  | 721  | 751  | 803  | 364  |
|  | 767  | 756  | 826  | 368  |
|  | 798  | 839  | 869  | 417  |
|  | 832  | 845  | 872  | 417  |
|  | 836  | 848  | 876  | 440  |
|  | 1102 | 1118 | 1171 | 453  |
|  | 1114 | 1131 | 1186 | 469  |
|  | 1155 | 1184 | 1228 | 471  |
|  | 1199 | 1222 | 1263 | 495  |
|  | 1417 | 1424 | 1432 | 497  |
|  | 1420 | 1427 | 1435 | 548  |
|  | 1426 | 1432 | 1440 | 580  |
|  | 1428 | 1435 | 1442 | 580  |
|  | 1438 | 1439 | 1446 | 601  |
|  | 1445 | 1447 | 1454 | 601  |
|  | 1446 | 1449 | 1457 | 639  |
|  | 1453 | 1453 | 1460 | 642  |
|  | 2472 | 2472 | 2471 | 651  |
|  | 2994 | 2997 | 2995 | 656  |
|  | 2998 | 3001 | 2999 | 725  |
|  | 3007 | 3024 | 3006 | 727  |
|  | 3013 | 3027 | 3011 | 730  |
|  | 3068 | 3065 | 3054 | 731  |
|  | 3076 | 3067 | 3057 | 737  |
|  | 3093 | 3090 | 3075 | 739  |
|  | 3096 | 3095 | 3078 | 750  |
|  | 3098 | 3106 | 3081 | 752  |
|  | 3104 | 3114 | 3084 | 799  |
|  | 3116 | 3123 | 3085 | 801  |
|  | 3124 | 3130 | 3093 | 865  |
|  |      |      |      | 868  |
|  |      |      |      | 878  |
|  |      |      |      | 879  |
|  |      |      |      | 944  |
|  |      |      |      | 944  |
|  |      |      |      | 953  |
|  |      |      |      | 954  |
|  |      |      |      | 966  |
|  |      |      |      | 971  |
|  |      |      |      | 977  |
|  |      |      |      | 977  |
|  |      |      |      | 980  |
|  |      |      |      | 980  |
|  |      |      |      | 1020 |
|  |      |      |      | 1032 |
|  |      |      |      | 1042 |
|  |      |      |      | 1043 |

|  |  |  |  |      |
|--|--|--|--|------|
|  |  |  |  | 1061 |
|  |  |  |  | 1062 |
|  |  |  |  | 1072 |
|  |  |  |  | 1074 |
|  |  |  |  | 1115 |
|  |  |  |  | 1117 |
|  |  |  |  | 1121 |
|  |  |  |  | 1123 |
|  |  |  |  | 1138 |
|  |  |  |  | 1138 |
|  |  |  |  | 1144 |
|  |  |  |  | 1144 |
|  |  |  |  | 1232 |
|  |  |  |  | 1233 |
|  |  |  |  | 1256 |
|  |  |  |  | 1259 |
|  |  |  |  | 1308 |
|  |  |  |  | 1308 |
|  |  |  |  | 1326 |
|  |  |  |  | 1330 |
|  |  |  |  | 1347 |
|  |  |  |  | 1348 |
|  |  |  |  | 1432 |
|  |  |  |  | 1433 |
|  |  |  |  | 1442 |
|  |  |  |  | 1444 |
|  |  |  |  | 1463 |
|  |  |  |  | 1465 |
|  |  |  |  | 1499 |
|  |  |  |  | 1500 |
|  |  |  |  | 1613 |
|  |  |  |  | 1614 |
|  |  |  |  | 1619 |
|  |  |  |  | 1620 |
|  |  |  |  | 1637 |
|  |  |  |  | 1638 |
|  |  |  |  | 1644 |
|  |  |  |  | 1646 |
|  |  |  |  | 2467 |
|  |  |  |  | 3173 |
|  |  |  |  | 3174 |
|  |  |  |  | 3181 |
|  |  |  |  | 3182 |
|  |  |  |  | 3186 |
|  |  |  |  | 3188 |
|  |  |  |  | 3194 |
|  |  |  |  | 3196 |

|  |  |  |  |                                                              |
|--|--|--|--|--------------------------------------------------------------|
|  |  |  |  | 3197<br>3199<br>3208<br>3209<br>3213<br>3214<br>3225<br>3229 |
|--|--|--|--|--------------------------------------------------------------|

**Table S6.** MN15 optimized energies (a.u.) and geometries (Cartesian coordinates in Å) of all intermediates and transition states (see Figure 2 of the manuscript) for the reaction  $\text{CH}_4 + \text{N}_2\text{O} \rightarrow \text{CH}_3\text{OH} + \text{N}_2$  catalyzed by  $(\text{CH}_3)_4\text{FeO}^-$ .

|             | S = 1/2                       | S = 3/2                         | S = 5/2                         |
|-------------|-------------------------------|---------------------------------|---------------------------------|
| <b>R</b>    | -1538.971235                  | -1538.961688                    | -1538.932369                    |
| C           | -3.586112 0.215284 -0.188493  | C -3.175323 0.000012 -0.335303  | C 3.499136 -0.085700 -0.172818  |
| H           | -2.596832 -0.006925 -0.585912 | H -2.427346 0.000007 -1.125965  | H 2.561425 -0.148757 -0.724073  |
| H           | -4.345036 0.040832 -0.950467  | H -3.031880 0.884229 0.283018   | H 3.780961 -1.076455 0.181148   |
| H           | -3.780781 -0.425405 0.670618  | H -4.179380 -0.000024 -0.759417 | H 4.288132 0.311174 -0.811133   |
| H           | -3.620222 1.255944 0.129968   | H -3.031836 -0.884162 0.283068  | H 3.356008 0.567935 0.686109    |
| O           | -0.397714 -0.477623 -1.452321 | O 0.127796 -0.000011 -1.738815  | O 0.295280 -0.024321 -1.622400  |
| Fe          | 0.425622 -0.021299 -0.181881  | Fe 0.303111 -0.000002 -0.101817 | Fe -0.490802 0.022435 0.032221  |
| C           | 2.204642 -0.823294 0.114071   | C 2.284712 0.000008 -0.045091   | C -2.478492 0.559082 0.141845   |
| C           | -0.481947 1.019730 1.242048   | C -0.446224 0.000001 1.810131   | C 0.578824 -0.540990 1.705316   |
| C           | -0.251644 -1.619725 0.777699  | C 0.323219 -2.015255 0.145886   | C 0.157544 1.933624 0.009703    |
| H           | 0.179362 -1.614675 1.782915   | H 0.747952 -2.323882 1.104476   | H -0.167766 2.308351 0.983860   |
| H           | 0.057523 -2.517584 0.242104   | H 0.856580 -2.476953 -0.687239  | H -0.324914 2.474306 -0.801390  |
| H           | -1.340057 -1.584625 0.843686  | H -0.729894 -2.314771 0.111174  | H 1.241676 1.963086 -0.078766   |
| C           | 1.547906 1.647540 -0.268041   | C 0.323233 2.015250 0.145879    | C -0.931153 -1.894434 -0.419787 |
| H           | 2.322585 1.724691 0.498523    | H 0.747986 2.323876 1.104461    | H -1.439771 -2.248628 0.479881  |
| H           | 0.936252 2.553889 -0.247255   | H -0.729881 2.314767 0.111190   | H -0.014564 -2.451325 -0.599331 |
| H           | 2.040694 1.563166 -1.242950   | H 0.856578 2.476947 -0.687256   | H -1.591066 -1.920132 -1.283911 |
| H           | -1.293254 0.449041 1.698831   | H -1.029284 -0.893980 2.052181  | H 1.097200 0.304790 2.166463    |
| H           | -0.874416 1.947742 0.821138   | H -1.029261 0.893994 2.052190   | H 1.310892 -1.317179 1.467685   |
| H           | 0.260145 1.274403 2.003770    | H 0.448530 -0.000015 2.445392   | H -0.141633 -0.951876 2.421904  |
| H           | 2.166963 -1.892454 -0.102908  | H 2.632779 -0.900437 -0.539971  | H -2.851918 0.757017 -0.866295  |
| H           | 2.404076 -0.684066 1.180710   | H 2.504626 0.000042 1.021468    | H -2.597011 1.461200 0.748983   |
| H           | 3.001462 -0.346429 -0.458999  | H 2.632777 0.900423 -0.540027   | H -3.064189 -0.251732 0.584770  |
| <b>TS1R</b> | -1538.915918                  | -1538.917731                    | -1538.899770                    |
| C           | 3.358251 0.136582 0.042026    | C 3.513544 0.134473 0.000032    | C 2.987164 -0.055266 0.020531   |
| H           | 2.064797 0.716563 -0.039176   | H 2.148908 0.633721 -0.000149   | H 2.010836 0.788061 -0.052835   |
| H           | 3.640457 0.309157 1.074345    | H 4.059153 1.072165 -0.002305   | H 3.552044 0.099397 -0.893797   |
| H           | 3.248657 -0.909065 -0.219838  | H 3.608834 -0.444624 0.910837   | H 3.525593 0.225662 0.920558    |
| H           | 3.912868 0.725913 -0.679502   | H 3.607874 -0.448682 -0.908270  | H 2.527480 -1.035231 0.082034   |
| O           | 1.052601 1.181826 -0.102482   | O 1.143607 1.092739 -0.000265   | O 0.994112 1.429213 -0.113730   |
| Fe          | -0.388133 0.118372 -0.022357  | Fe -0.328096 0.064960 -0.000003 | Fe -0.307754 0.063780 -0.015203 |
| C           | 0.234736 -1.191052 1.299180   | C -1.583809 -0.712455 1.313182  | C -1.671739 1.593034 -0.087277  |
| C           | -2.176957 -0.811619 0.073097  | C -1.583711 -0.712721 -1.313112 | C -1.963256 -1.056624 0.065742  |
| C           | 0.128091 -1.274001 -1.305197  | C 0.738280 -1.655761 0.000137   | C 0.226903 -0.797982 1.798446   |
| H           | -0.284004 -0.863377 -2.233596 | H 0.132950 -2.568104 0.001244   | H -0.603472 -0.728485 2.506723  |
| H           | -0.276198 -2.266414 -1.111728 | H 1.386925 -1.649005 0.883385   | H 1.103082 -0.291103 2.209155   |
| H           | 1.217473 -1.300684 -1.365467  | H 1.384699 -1.649812 -0.884769  | H 0.457260 -1.856227 1.632073   |
| C           | -1.556700 1.776178 0.013990   | C -1.380595 1.801389 -0.000017  | C 0.236266 -1.065320 -1.666995  |
| H           | -1.038679 2.605853 -0.471886  | H -1.075874 2.367640 0.885496   | H -0.574862 -1.069393 -2.400392 |

|             |                                                                                                                                                                                                                                                                                                                                                                                                                                                                                                                                                                                                                                                                                                                                                                                                                  |                                                                                                                                                                                                                                                                                                                                                                                                                                                                                                                                                                                                                                                                                                                                                                                                                  |                                                                                                                                                                                                                                                                                                                                                                                                                                                                                                                                                                                                                                                                                                                                                                                                                   |
|-------------|------------------------------------------------------------------------------------------------------------------------------------------------------------------------------------------------------------------------------------------------------------------------------------------------------------------------------------------------------------------------------------------------------------------------------------------------------------------------------------------------------------------------------------------------------------------------------------------------------------------------------------------------------------------------------------------------------------------------------------------------------------------------------------------------------------------|------------------------------------------------------------------------------------------------------------------------------------------------------------------------------------------------------------------------------------------------------------------------------------------------------------------------------------------------------------------------------------------------------------------------------------------------------------------------------------------------------------------------------------------------------------------------------------------------------------------------------------------------------------------------------------------------------------------------------------------------------------------------------------------------------------------|-------------------------------------------------------------------------------------------------------------------------------------------------------------------------------------------------------------------------------------------------------------------------------------------------------------------------------------------------------------------------------------------------------------------------------------------------------------------------------------------------------------------------------------------------------------------------------------------------------------------------------------------------------------------------------------------------------------------------------------------------------------------------------------------------------------------|
|             | H -1.602881 1.987897 1.090331<br>H -2.578933 1.680993 -0.358146<br>H -2.089781 -1.892961 0.224052<br>H -2.720485 -0.624925 -0.859370<br>H -2.772036 -0.382737 0.887068<br>H 1.323974 -1.140034 1.354308<br>H -0.100115 -2.218001 1.154101<br>H -0.199005 -0.776977 2.217070                                                                                                                                                                                                                                                                                                                                                                                                                                                                                                                                      | H -2.468410 1.672384 -0.001283<br>H -1.073867 2.369560 -0.883578<br>H -1.633333 -1.799390 -1.268849<br>H -1.068195 -0.395303 -2.228937<br>H -2.574277 -0.263480 -1.269410<br>H -1.067045 -0.396998 2.228984<br>H -1.635299 -1.798984 1.267780<br>H -2.573660 -0.261499 1.270705                                                                                                                                                                                                                                                                                                                                                                                                                                                                                                                                  | H 0.425620 -2.096399 -1.348492<br>H 1.138478 -0.649673 -2.121455<br>H -1.635694 -2.090701 0.176463<br>H -2.523474 -0.927679 -0.859627<br>H -2.561853 -0.747021 0.921808<br>H -2.150627 1.647927 0.893449<br>H -2.426970 1.427650 -0.857966<br>H -1.106778 2.504171 -0.285272                                                                                                                                                                                                                                                                                                                                                                                                                                                                                                                                      |
| <b>11</b>   | -1538.921564<br>C -3.610244 -0.175780 0.119182<br>H -0.478797 -1.538118 -1.575570<br>H -3.633121 -0.123410 1.194895<br>H -2.666353 -0.272874 -0.398098<br>H -4.535724 -0.106246 -0.428603<br>O -0.634946 -0.593784 -1.461882<br>Fe 0.436182 0.020840 -0.110370<br>C 1.341739 -1.786977 0.114625<br>C -0.249987 1.903961 -0.277129<br>C -0.446331 -0.164794 1.635213<br>H 0.362111 -0.103555 2.367624<br>H -0.905542 -1.154023 1.683651<br>H -1.185413 0.615919 1.814793<br>C 2.248972 0.829583 0.073615<br>H 3.046071 0.156365 -0.248485<br>H 2.326802 0.972253 1.157419<br>H 2.341064 1.802641 -0.412261<br>H -1.344645 1.860524 -0.272675<br>H 0.088269 2.291074 -1.244615<br>H 0.095363 2.569345 0.520669<br>H 0.580171 -2.571560 0.219980<br>H 2.011012 -1.834224 0.980646<br>H 1.932687 -1.991647 -0.787730 | -1538.939217<br>C 3.546167 0.028677 0.390034<br>H -0.046636 -0.028022 2.417712<br>H 3.620070 0.461214 -0.593852<br>H 2.587311 -0.021285 0.886387<br>H 4.433931 -0.365684 0.857197<br>O 0.510288 -0.067940 1.636680<br>Fe -0.415261 -0.013188 -0.013217<br>C -2.149296 -1.090203 0.212359<br>C 0.685242 1.134076 -1.315179<br>C 0.327986 -1.627956 -1.011431<br>H 0.012928 -1.638565 -2.057352<br>H 0.006749 -2.543318 -0.511862<br>H 1.416215 -1.541613 -0.961599<br>C -1.601964 1.646029 0.141064<br>H -2.129432 1.588962 1.096841<br>H -2.334656 1.667274 -0.669542<br>H -0.988392 2.548167 0.107797<br>H 1.433454 0.563810 -1.868179<br>H 1.179859 1.863252 -0.666343<br>H 0.034457 1.667482 -2.011244<br>H -1.896331 -2.065985 0.632509<br>H -2.602931 -1.235889 -0.772045<br>H -2.860939 -0.577133 0.862694 | -1538.939092<br>C 3.552391 0.032603 0.387246<br>H -0.041856 -0.008774 2.418150<br>H 3.617737 0.430491 -0.611780<br>H 2.595135 -0.014256 0.887045<br>H 4.446609 -0.332731 0.865529<br>O 0.513074 -0.059699 1.636362<br>Fe -0.415373 -0.013485 -0.012226<br>C -2.152301 -1.086163 0.215615<br>C 0.678058 1.124281 -1.329663<br>C 0.326063 -1.636699 -0.998110<br>H -0.004761 -1.664789 -2.038850<br>H 0.015641 -2.545164 -0.479462<br>H 1.414474 -1.546807 -0.965816<br>C -1.597546 1.648683 0.139635<br>H -2.122171 1.596052 1.097293<br>H -2.332702 1.670450 -0.668692<br>H -0.981073 2.548741 0.102266<br>H 1.420099 0.549890 -1.886624<br>H 1.179528 1.856834 -0.690158<br>H 0.021482 1.654607 -2.022685<br>H -1.904519 -2.063898 0.634229<br>H -2.607389 -1.228226 -0.768711<br>H -2.861124 -0.570438 0.866915 |
| <b>TS1P</b> | -1538.908794<br>H 2.758154 0.097720 1.192764<br>H 3.237236 0.768975 -0.442601<br>C 3.047319 -0.096587 0.170320<br>O 1.396209 -0.605701 -0.607164<br>H 3.681983 -0.954849 -0.001536<br>H 1.390269 -1.554049 -0.429396<br>Fe -0.338430 0.013970 -0.179396<br>C -2.229983 0.563574 -0.298617<br>C 0.245615 1.933622 -0.407530<br>H 0.381783 2.165566 -1.474867<br>H 1.221328 2.043932 0.082654<br>H -0.435736 2.675710 0.022560<br>H -2.932030 -0.218916 -0.003279<br>H -2.364111 0.777592 -1.370356                                                                                                                                                                                                                                                                                                                | -1538.916194<br>H -3.014654 0.941512 -0.608454<br>H -3.887772 -0.400754 0.314630<br>C -3.237310 -0.104668 -0.491039<br>O -1.423307 -0.467068 0.400145<br>H -3.167928 -0.741375 -1.357220<br>H -1.431977 -1.432345 0.447993<br>Fe 0.379037 0.026826 -0.021331<br>C 1.000977 -0.072869 1.870073<br>C -0.018530 1.994132 0.230109<br>H -0.795277 2.118424 0.993778<br>H -0.364873 2.433605 -0.715445<br>H 0.876446 2.541805 0.544991<br>H 2.044265 0.231463 1.748362<br>H 0.938520 -1.091862 2.250327                                                                                                                                                                                                                                                                                                               | -1538.898385<br>C 3.255219 -0.186253 -0.003581<br>H 3.625483 -0.710042 0.864522<br>H 3.627140 -0.506618 -0.964468<br>H 3.048087 0.864002 0.113770<br>O 1.446403 -0.732891 -0.073561<br>H 1.417129 -1.699512 -0.082940<br>Fe -0.403570 0.033966 -0.018782<br>C -1.387554 0.418651 1.774255<br>C -1.465846 0.457672 -1.751254<br>H -1.657404 -0.440081 -2.343350<br>H -0.964784 1.212841 -2.360243<br>H -2.419659 0.861127 -1.393060<br>H -0.700386 0.127990 2.574459<br>H -2.298921 -0.179383 1.848468                                                                                                                                                                                                                                                                                                             |

|             |                                                                                                                                                                                                                                                                                                                                                                                                                                                                                                                                                                                                                                                                                                                                                                                                                  |                                                                                                                                                                                                                                                                                                                                                                                                                                                                                                                                                                                                                                                                                                                                                                                                                 |                                                                                                                                                                                                                                                                                                            |
|-------------|------------------------------------------------------------------------------------------------------------------------------------------------------------------------------------------------------------------------------------------------------------------------------------------------------------------------------------------------------------------------------------------------------------------------------------------------------------------------------------------------------------------------------------------------------------------------------------------------------------------------------------------------------------------------------------------------------------------------------------------------------------------------------------------------------------------|-----------------------------------------------------------------------------------------------------------------------------------------------------------------------------------------------------------------------------------------------------------------------------------------------------------------------------------------------------------------------------------------------------------------------------------------------------------------------------------------------------------------------------------------------------------------------------------------------------------------------------------------------------------------------------------------------------------------------------------------------------------------------------------------------------------------|------------------------------------------------------------------------------------------------------------------------------------------------------------------------------------------------------------------------------------------------------------------------------------------------------------|
|             | H -2.432568 1.479929 0.260379<br>C -0.405323 0.135638 1.753050<br>H 0.502308 -0.394398 2.068191<br>H -1.283746 -0.363507 2.164289<br>H -0.360616 1.176068 2.078783<br>C -1.023895 -1.922159 -0.206153<br>H -1.767592 -2.101105 0.579412<br>H -0.250091 -2.701771 -0.099549<br>H -1.519463 -2.099025 -1.172265                                                                                                                                                                                                                                                                                                                                                                                                                                                                                                    | H 0.460041 0.635619 2.494137<br>C 1.560849 0.545026 -1.558665<br>H 0.840250 0.488345 -2.387947<br>H 2.370830 -0.158940 -1.767993<br>H 1.944198 1.567627 -1.515079<br>C 0.943473 -1.906900 -0.355921<br>H 2.015373 -1.999268 -0.146147<br>H 0.785259 -2.196215 -1.403385<br>H 0.422030 -2.626906 0.293548                                                                                                                                                                                                                                                                                                                                                                                                                                                                                                        | H -1.620925 1.480920 1.870331<br>C -1.074376 -1.923969 0.042205<br>H -0.697357 -2.494788 -0.811710<br>H -2.163082 -1.861411 -0.023448<br>H -0.795249 -2.413644 0.978981<br>C 0.458759 1.907909 0.047185<br>H -0.341183 2.649272 -0.009937<br>H 1.125074 2.010658 -0.814250<br>H 1.020431 2.034633 0.976826 |
| <b>TS2R</b> | -1538.907741<br>C 2.254202 0.285002 0.306425<br>H 1.582632 -0.500058 -0.713966<br>H 2.956430 -0.490046 0.634389<br>H 2.795278 1.037853 -0.276730<br>H 1.867472 0.771258 1.201673<br>O 0.717452 -1.009512 -1.375597<br>Fe -0.022861 -0.059396 -0.169111<br>C -1.872093 -0.396303 -0.744715<br>C -0.752283 0.866136 1.576663<br>C -0.183477 1.852722 -0.644756<br>H -1.210403 2.208891 -0.692942<br>H 0.251423 1.785089 -1.647056<br>H 0.423115 2.492165 -0.004209<br>C -0.145168 -1.582799 1.130023<br>H -1.180074 -1.763974 1.411866<br>H 0.455886 -1.324896 2.001905<br>H 0.271822 -2.439885 0.605037<br>H 0.115215 1.142148 2.186110<br>H -1.365735 0.172379 2.155431<br>H -1.340999 1.769791 1.400530<br>H -2.004406 0.116645 -1.700394<br>H -2.598185 -0.032369 -0.015813<br>H -1.971792 -1.473133 -0.886022 | -1538.911960<br>C 2.019092 -0.800413 0.592676<br>H 1.441023 -0.704166 -0.688895<br>H 2.154206 -1.879391 0.706416<br>H 2.970918 -0.314162 0.360129<br>H 1.661599 -0.396980 1.540848<br>O 0.672066 -0.461509 -1.643479<br>Fe -0.065047 0.055704 -0.143784<br>C -1.915665 0.118855 -0.841506<br>C -0.804749 0.833202 1.599802<br>C 0.869209 1.875492 -0.180432<br>H 0.103830 2.574397 -0.534567<br>H 1.688838 1.826053 -0.896586<br>H 1.221470 2.199084 0.800148<br>C -0.705643 -1.747554 0.602184<br>H -1.782690 -1.787154 0.758549<br>H -0.188994 -1.883673 1.553396<br>H -0.388482 -2.497151 -0.123128<br>H 0.008876 0.868352 2.330804<br>H -1.617227 0.217789 1.994858<br>H -1.165143 1.852843 1.437857<br>H -2.005916 -0.697709 -1.552161<br>H -1.869095 1.082209 -1.356375<br>H -2.691987 0.105950 -0.081406 |                                                                                                                                                                                                                                                                                                            |
| <b>I2</b>   | -1538.954041<br>C 1.694762 0.286141 -1.053044<br>H 2.119770 1.284459 -0.956879<br>H 2.455860 -0.483698 -0.922596<br>H 1.231148 0.173710 -2.045570<br>O 0.342818 -1.922232 -0.042105<br>H 1.279438 -2.040626 0.150609<br>Fe -0.014127 -0.074820 -0.106385<br>C -0.423376 1.836843 -0.591585<br>C -1.311016 0.298689 1.446294<br>H -0.852484 1.086990 2.043253<br>H -1.294954 -0.658226 1.970650<br>H -2.324570 0.572729 1.166019<br>H -0.281070 1.931689 -1.676349                                                                                                                                                                                                                                                                                                                                                | -1538.964244<br>C 1.477287 -1.426805 0.198299<br>H 1.912920 -1.690285 -0.765734<br>H 2.243036 -1.038813 0.871424<br>H 0.998517 -2.301996 0.647973<br>O 0.385805 0.689120 1.803377<br>H 1.300412 0.990991 1.790110<br>Fe 0.011770 -0.006643 0.089787<br>C -0.598018 -1.253003 -1.405615<br>C -1.121491 1.453806 -0.828752<br>H -0.751829 1.695644 -1.826633<br>H -1.005693 2.315189 -0.167364<br>H -2.169622 1.153762 -0.877505<br>H -0.646694 -2.286346 -1.060557                                                                                                                                                                                                                                                                                                                                               |                                                                                                                                                                                                                                                                                                            |



|             |                                                                                                                                                                                                                                                                                                                                                                                                                                                                                                                                                                                                                                                                                                                                                                                                                     |                                                                                                                                                                                                                                                                                                                                                                                                                                                                                                                                                                                                                                                                                                                                                                                                                |                                                                                                                                                                                                                                                                                                                                                                                                                                 |
|-------------|---------------------------------------------------------------------------------------------------------------------------------------------------------------------------------------------------------------------------------------------------------------------------------------------------------------------------------------------------------------------------------------------------------------------------------------------------------------------------------------------------------------------------------------------------------------------------------------------------------------------------------------------------------------------------------------------------------------------------------------------------------------------------------------------------------------------|----------------------------------------------------------------------------------------------------------------------------------------------------------------------------------------------------------------------------------------------------------------------------------------------------------------------------------------------------------------------------------------------------------------------------------------------------------------------------------------------------------------------------------------------------------------------------------------------------------------------------------------------------------------------------------------------------------------------------------------------------------------------------------------------------------------|---------------------------------------------------------------------------------------------------------------------------------------------------------------------------------------------------------------------------------------------------------------------------------------------------------------------------------------------------------------------------------------------------------------------------------|
|             | H 0.270004 2.528490 -0.099260<br>H -1.450429 2.132151 -0.357416<br>C 1.395179 0.260952 1.383185<br>H 0.941872 -0.262058 2.224778<br>H 1.421553 1.337059 1.557730<br>H 2.400330 -0.121904 1.208122<br>C -1.744316 -0.650391 -0.849455<br>H -2.526134 0.105134 -0.932696<br>H -2.104058 -1.573522 -0.397319<br>H -1.328926 -0.882618 -1.842591                                                                                                                                                                                                                                                                                                                                                                                                                                                                        | H 0.161157 -1.154967 -2.183722<br>H -1.568983 -0.930806 -1.778118<br>C 1.482056 1.119584 -0.841371<br>H 1.270082 2.187525 -0.763395<br>H 1.497116 0.828663 -1.895636<br>H 2.455186 0.896990 -0.393418<br>C -1.749854 -0.564324 0.927006<br>H -2.543391 -0.847251 0.237683<br>H -2.036639 0.277350 1.555146<br>H -1.447910 -1.411443 1.550866                                                                                                                                                                                                                                                                                                                                                                                                                                                                   |                                                                                                                                                                                                                                                                                                                                                                                                                                 |
| <b>TS2P</b> | -1538.923340<br>C 1.575727 -0.198277 -1.037010<br>H 0.684089 -0.010423 -1.729958<br>H 2.294218 0.607359 -1.153924<br>H 1.985767 -1.184112 -1.226194<br>O 1.707687 -0.337974 0.854296<br>H 1.890496 0.575802 1.112484<br>Fe -0.072994 0.005617 -0.081382<br>C -1.878866 0.405600 -0.830612<br>C -0.864522 -0.094785 1.709738<br>H -0.690785 0.845051 2.240458<br>H -0.376305 -0.918708 2.232127<br>H -1.934281 -0.286866 1.619788<br>H -1.781201 0.667196 -1.891338<br>H -2.312598 1.260260 -0.306369<br>H -2.544233 -0.455949 -0.737438<br>C 0.221302 2.051320 -0.086680<br>H 1.232075 2.342521 0.249903<br>H -0.504513 2.570378 0.549608<br>H 0.105398 2.442891 -1.107009<br>C -0.443733 -1.972657 -0.330556<br>H -1.369727 -2.295875 0.156885<br>H 0.401813 -2.509923 0.118210<br>H -0.503310 -2.239066 -1.394933 | -1538.915966<br>C 2.019964 0.141474 0.622753<br>H 1.392312 0.151155 1.516198<br>H 2.659906 -0.730219 0.589532<br>H 2.508079 1.086452 0.441115<br>O 1.471257 -0.018096 -1.184748<br>H 1.582067 -0.969115 -1.319853<br>Fe -0.171359 0.011551 -0.056406<br>C -1.321704 0.059315 1.543517<br>C -1.699546 -0.146721 -1.394450<br>H -2.186813 -1.122710 -1.331008<br>H -1.237186 -0.020406 -2.380282<br>H -2.436483 0.644989 -1.232963<br>H -0.657485 0.126826 2.417252<br>H -1.925034 -0.847578 1.634471<br>H -1.963691 0.943718 1.534707<br>C 0.110174 -1.995431 0.356142<br>H 0.862881 -2.512735 -0.264198<br>H -0.846880 -2.505747 0.208730<br>H 0.401521 -2.140555 1.405612<br>C -0.017280 2.028177 0.097630<br>H -0.999202 2.459929 -0.122681<br>H 0.717197 2.417493 -0.617049<br>H 0.264441 2.342051 1.111416 |                                                                                                                                                                                                                                                                                                                                                                                                                                 |
| <b>P</b>    | -1538.984537<br>C -1.923926 0.018512 -1.389865<br>H -1.270142 0.899853 -1.393905<br>H -1.294391 -0.871785 -1.505093<br>H -2.593273 0.082640 -2.248331<br>O -2.715249 -0.044066 -0.227193<br>H -2.103927 -0.057169 0.525804<br>Fe 0.617271 0.005668 0.238118<br>C 1.703552 -1.297177 -0.894436<br>C -0.322427 1.371772 1.438320<br>H -0.908405 0.940303 2.258558<br>H -0.970833 2.048829 0.869089<br>H 0.464520 1.996582 1.880500                                                                                                                                                                                                                                                                                                                                                                                    | -1539.010394<br>C 2.051679 -0.668625 -1.115676<br>H 1.480998 -1.485749 -0.661341<br>H 1.348242 -0.028143 -1.662822<br>H 2.755004 -1.093770 -1.832371<br>O 2.789994 0.057677 -0.161143<br>H 2.150098 0.530724 0.393638<br>Fe -0.665682 0.082376 0.186987<br>C -1.609340 1.013746 -1.347132<br>C -0.125149 -0.753808 1.950327<br>H -0.035849 -0.036025 2.774291<br>H 0.878583 -1.171728 1.782295<br>H -0.767636 -1.586868 2.258569                                                                                                                                                                                                                                                                                                                                                                               | -1538.988336<br>C -2.686601 0.677730 -0.018639<br>H -2.066309 1.088607 0.781860<br>H -2.282920 1.046411 -0.966340<br>H -3.707948 1.044433 0.095975<br>O -2.730249 -0.728320 0.023238<br>H -1.811070 -1.038433 0.004771<br>Fe 0.724007 -0.022792 -0.000433<br>C 0.459548 2.037811 -0.013044<br>C 2.757757 -0.281596 -0.016570<br>H 3.143979 0.201025 -0.920137<br>H 3.069032 -1.329614 -0.001789<br>H 3.164142 0.231473 0.860881 |

|   |           |           |           |   |           |           |           |   |           |           |           |
|---|-----------|-----------|-----------|---|-----------|-----------|-----------|---|-----------|-----------|-----------|
| H | 1.977654  | -2.207056 | -0.349506 | H | -1.789327 | 2.083192  | -1.184527 | H | 1.429251  | 2.523649  | -0.163706 |
| H | 2.607093  | -0.841392 | -1.311643 | H | -2.541154 | 0.528313  | -1.660119 | H | 0.045122  | 2.387229  | 0.939612  |
| H | 1.070787  | -1.606617 | -1.738002 | H | -0.910938 | 0.932308  | -2.192648 | H | -0.212569 | 2.355900  | -0.817559 |
| C | -0.169591 | -1.630036 | 1.179536  | C | 0.292195  | 1.819377  | 0.654649  | C | -0.034619 | -0.897289 | -1.725084 |
| H | -1.023555 | -1.443143 | 1.840864  | H | 1.082474  | 1.806750  | 1.419426  | H | -0.274595 | -1.960648 | -1.610727 |
| H | 0.638113  | -2.043580 | 1.798192  | H | -0.545168 | 2.373188  | 1.103376  | H | 0.785696  | -0.818359 | -2.448340 |
| H | -0.447779 | -2.413552 | 0.464817  | H | 0.630075  | 2.411869  | -0.204013 | H | -0.909635 | -0.396542 | -2.150982 |
| C | 1.469084  | 1.564229  | -0.768201 | C | -1.320314 | -1.703400 | -0.491561 | C | -0.005054 | -0.853246 | 1.757320  |
| H | 2.468702  | 1.728101  | -0.344761 | H | -2.357826 | -1.777894 | -0.138091 | H | 0.818349  | -0.744282 | 2.473061  |
| H | 0.914742  | 2.505454  | -0.683658 | H | -0.776049 | -2.564622 | -0.085872 | H | -0.234039 | -1.921817 | 1.674284  |
| H | 1.603486  | 1.323895  | -1.828569 | H | -1.348165 | -1.768467 | -1.585965 | H | -0.884852 | -0.350356 | 2.170583  |

**Table S7.** Harmonic frequencies ( $\text{cm}^{-1}$ ) of all intermediates and transition states (see Figure 2 of the manuscript) for the reaction  $\text{CH}_4 + \text{N}_2\text{O} \rightarrow \text{CH}_3\text{OH} + \text{N}_2$  catalyzed by  $(\text{CH}_3)_4\text{FeO}^-$ . Negative values indicate imaginary frequencies.

|   | S = 1/2 | S = 3/2 | S = 5/2 |
|---|---------|---------|---------|
| R | 53      | 24      | 34      |
|   | 63      | 67      | 61      |
|   | 77      | 80      | 74      |
|   | 86      | 94      | 90      |
|   | 99      | 102     | 97      |
|   | 125     | 117     | 114     |
|   | 147     | 117     | 126     |
|   | 162     | 137     | 139     |
|   | 183     | 149     | 152     |
|   | 197     | 183     | 160     |
|   | 216     | 201     | 168     |
|   | 226     | 205     | 173     |
|   | 262     | 235     | 189     |
|   | 275     | 235     | 197     |
|   | 321     | 278     | 220     |
|   | 325     | 281     | 228     |
|   | 367     | 306     | 235     |
|   | 444     | 450     | 446     |
|   | 530     | 487     | 468     |
|   | 549     | 492     | 486     |
|   | 558     | 493     | 499     |
|   | 633     | 566     | 511     |
|   | 656     | 590     | 534     |
|   | 690     | 627     | 570     |
|   | 724     | 686     | 588     |
|   | 737     | 691     | 601     |
|   | 778     | 711     | 603     |
|   | 805     | 715     | 641     |
|   | 817     | 761     | 650     |
|   | 999     | 901     | 732     |
|   | 1118    | 1070    | 1047    |
|   | 1134    | 1090    | 1062    |
|   | 1142    | 1097    | 1075    |
|   | 1180    | 1134    | 1094    |
|   | 1286    | 1294    | 1287    |
|   | 1331    | 1311    | 1326    |
|   | 1334    | 1331    | 1335    |
|   | 1412    | 1408    | 1406    |
|   | 1420    | 1416    | 1407    |
|   | 1426    | 1417    | 1417    |

|             |       |       |       |
|-------------|-------|-------|-------|
|             | 1430  | 1423  | 1420  |
|             | 1443  | 1423  | 1422  |
|             | 1445  | 1435  | 1425  |
|             | 1451  | 1437  | 1427  |
|             | 1465  | 1447  | 1433  |
|             | 1542  | 1535  | 1539  |
|             | 1543  | 1538  | 1542  |
|             | 2999  | 2990  | 3000  |
|             | 3016  | 3004  | 3009  |
|             | 3017  | 3009  | 3035  |
|             | 3024  | 3042  | 3036  |
|             | 3038  | 3059  | 3041  |
|             | 3073  | 3069  | 3072  |
|             | 3088  | 3073  | 3086  |
|             | 3093  | 3083  | 3092  |
|             | 3095  | 3084  | 3095  |
|             | 3105  | 3107  | 3133  |
|             | 3106  | 3107  | 3136  |
|             | 3108  | 3145  | 3142  |
|             | 3125  | 3159  | 3151  |
|             | 3144  | 3164  | 3153  |
|             | 3151  | 3177  | 3165  |
|             | 3162  | 3197  | 3166  |
| <b>TS1R</b> | -1759 | -1760 | -1832 |
|             | 36    | 45    | 45    |
|             | 65    | 65    | 60    |
|             | 100   | 105   | 85    |
|             | 110   | 116   | 97    |
|             | 121   | 133   | 114   |
|             | 146   | 144   | 131   |
|             | 168   | 183   | 164   |
|             | 182   | 188   | 166   |
|             | 204   | 194   | 184   |
|             | 221   | 222   | 203   |
|             | 245   | 225   | 210   |
|             | 261   | 264   | 243   |
|             | 274   | 278   | 258   |
|             | 331   | 290   | 304   |
|             | 376   | 398   | 385   |
|             | 401   | 407   | 419   |
|             | 427   | 460   | 456   |
|             | 471   | 481   | 460   |
|             | 506   | 495   | 472   |
|             | 520   | 511   | 513   |
|             | 543   | 541   | 517   |
|             | 557   | 552   | 552   |
|             | 570   | 568   | 578   |

|           |      |      |      |
|-----------|------|------|------|
|           | 605  | 578  | 583  |
|           | 609  | 658  | 592  |
|           | 664  | 668  | 616  |
|           | 716  | 688  | 626  |
|           | 746  | 728  | 686  |
|           | 751  | 741  | 695  |
|           | 789  | 751  | 715  |
|           | 990  | 1034 | 1048 |
|           | 1051 | 1076 | 1056 |
|           | 1092 | 1088 | 1068 |
|           | 1107 | 1095 | 1097 |
|           | 1117 | 1102 | 1124 |
|           | 1125 | 1121 | 1137 |
|           | 1158 | 1142 | 1217 |
|           | 1404 | 1399 | 1410 |
|           | 1407 | 1404 | 1411 |
|           | 1412 | 1404 | 1412 |
|           | 1415 | 1408 | 1418 |
|           | 1416 | 1414 | 1420 |
|           | 1419 | 1420 | 1424 |
|           | 1427 | 1425 | 1429 |
|           | 1428 | 1425 | 1431 |
|           | 1441 | 1435 | 1441 |
|           | 1442 | 1438 | 1443 |
|           | 2987 | 2990 | 3001 |
|           | 2994 | 2995 | 3004 |
|           | 3002 | 2998 | 3021 |
|           | 3009 | 3001 | 3043 |
|           | 3056 | 3067 | 3077 |
|           | 3061 | 3070 | 3078 |
|           | 3069 | 3071 | 3080 |
|           | 3086 | 3083 | 3102 |
|           | 3092 | 3083 | 3104 |
|           | 3099 | 3103 | 3107 |
|           | 3105 | 3106 | 3126 |
|           | 3122 | 3142 | 3133 |
|           | 3132 | 3143 | 3140 |
|           | 3217 | 3214 | 3197 |
|           | 3221 | 3223 | 3217 |
| <b>11</b> | 42   | 31   | 28   |
|           | 51   | 48   | 47   |
|           | 65   | 69   | 63   |
|           | 74   | 94   | 94   |
|           | 123  | 104  | 102  |
|           | 126  | 106  | 105  |
|           | 138  | 135  | 134  |
|           | 151  | 142  | 140  |

|  |      |      |      |
|--|------|------|------|
|  | 181  | 155  | 154  |
|  | 192  | 166  | 165  |
|  | 198  | 174  | 174  |
|  | 218  | 182  | 183  |
|  | 242  | 194  | 194  |
|  | 255  | 214  | 214  |
|  | 260  | 231  | 232  |
|  | 268  | 243  | 240  |
|  | 275  | 283  | 281  |
|  | 449  | 318  | 318  |
|  | 472  | 431  | 431  |
|  | 492  | 481  | 481  |
|  | 500  | 496  | 496  |
|  | 508  | 515  | 515  |
|  | 556  | 535  | 536  |
|  | 587  | 537  | 537  |
|  | 608  | 593  | 593  |
|  | 620  | 605  | 606  |
|  | 631  | 637  | 637  |
|  | 645  | 649  | 649  |
|  | 655  | 656  | 657  |
|  | 692  | 658  | 659  |
|  | 719  | 682  | 682  |
|  | 755  | 691  | 691  |
|  | 800  | 731  | 731  |
|  | 1086 | 1070 | 1070 |
|  | 1096 | 1094 | 1094 |
|  | 1109 | 1097 | 1097 |
|  | 1139 | 1128 | 1128 |
|  | 1380 | 1379 | 1379 |
|  | 1407 | 1411 | 1411 |
|  | 1409 | 1414 | 1414 |
|  | 1414 | 1416 | 1417 |
|  | 1421 | 1421 | 1421 |
|  | 1424 | 1426 | 1426 |
|  | 1428 | 1426 | 1427 |
|  | 1432 | 1432 | 1432 |
|  | 1437 | 1439 | 1439 |
|  | 1440 | 1445 | 1445 |
|  | 2971 | 3013 | 3013 |
|  | 2992 | 3015 | 3015 |
|  | 3009 | 3017 | 3017 |
|  | 3027 | 3022 | 3023 |
|  | 3037 | 3092 | 3091 |
|  | 3057 | 3097 | 3098 |
|  | 3070 | 3099 | 3099 |
|  | 3074 | 3102 | 3103 |

|             |       |      |      |
|-------------|-------|------|------|
|             | 3086  | 3104 | 3105 |
|             | 3107  | 3108 | 3108 |
|             | 3113  | 3111 | 3111 |
|             | 3114  | 3112 | 3112 |
|             | 3125  | 3117 | 3117 |
|             | 3284  | 3282 | 3282 |
|             | 3298  | 3297 | 3297 |
|             | 3848  | 3910 | 3911 |
| <b>TS1P</b> | -1476 | -665 | -856 |
|             | 29    | 50   | 31   |
|             | 84    | 54   | 47   |
|             | 93    | 81   | 66   |
|             | 100   | 93   | 73   |
|             | 121   | 137  | 78   |
|             | 136   | 139  | 87   |
|             | 148   | 158  | 119  |
|             | 168   | 174  | 153  |
|             | 189   | 180  | 174  |
|             | 205   | 219  | 185  |
|             | 217   | 226  | 191  |
|             | 237   | 236  | 207  |
|             | 263   | 243  | 262  |
|             | 300   | 263  | 292  |
|             | 425   | 369  | 325  |
|             | 449   | 430  | 351  |
|             | 460   | 450  | 429  |
|             | 493   | 472  | 452  |
|             | 501   | 486  | 464  |
|             | 537   | 507  | 492  |
|             | 557   | 536  | 503  |
|             | 608   | 557  | 542  |
|             | 618   | 569  | 570  |
|             | 649   | 585  | 583  |
|             | 651   | 599  | 586  |
|             | 664   | 609  | 590  |
|             | 681   | 635  | 594  |
|             | 700   | 686  | 632  |
|             | 718   | 699  | 648  |
|             | 742   | 732  | 699  |
|             | 884   | 787  | 880  |
|             | 920   | 829  | 919  |
|             | 1091  | 1058 | 1030 |
|             | 1106  | 1091 | 1040 |
|             | 1116  | 1102 | 1054 |
|             | 1138  | 1118 | 1082 |
|             | 1399  | 1396 | 1400 |
|             | 1405  | 1403 | 1409 |

|             |       |       |      |
|-------------|-------|-------|------|
|             | 1408  | 1405  | 1410 |
|             | 1412  | 1405  | 1415 |
|             | 1417  | 1421  | 1417 |
|             | 1418  | 1422  | 1420 |
|             | 1425  | 1427  | 1425 |
|             | 1432  | 1432  | 1426 |
|             | 1434  | 1437  | 1430 |
|             | 1444  | 1440  | 1434 |
|             | 2924  | 2953  | 3005 |
|             | 2958  | 2974  | 3008 |
|             | 2965  | 2978  | 3010 |
|             | 2990  | 3017  | 3013 |
|             | 2995  | 3024  | 3084 |
|             | 3031  | 3040  | 3089 |
|             | 3036  | 3049  | 3094 |
|             | 3054  | 3055  | 3094 |
|             | 3062  | 3062  | 3099 |
|             | 3083  | 3088  | 3104 |
|             | 3096  | 3118  | 3108 |
|             | 3112  | 3147  | 3109 |
|             | 3127  | 3150  | 3140 |
|             | 3268  | 3308  | 3287 |
|             | 3293  | 3316  | 3312 |
|             | 3845  | 3832  | 3802 |
| <b>TS2R</b> | -1661 | -1818 |      |
|             | 62    | 89    |      |
|             | 74    | 141   |      |
|             | 102   | 157   |      |
|             | 118   | 166   |      |
|             | 135   | 184   |      |
|             | 169   | 207   |      |
|             | 185   | 221   |      |
|             | 217   | 229   |      |
|             | 248   | 242   |      |
|             | 262   | 260   |      |
|             | 284   | 265   |      |
|             | 304   | 280   |      |
|             | 332   | 299   |      |
|             | 383   | 315   |      |
|             | 437   | 445   |      |
|             | 458   | 472   |      |
|             | 501   | 495   |      |
|             | 516   | 506   |      |
|             | 535   | 514   |      |
|             | 539   | 549   |      |
|             | 589   | 611   |      |
|             | 685   | 628   |      |



|           |      |      |  |
|-----------|------|------|--|
|           | 701  | 653  |  |
|           | 711  | 667  |  |
|           | 731  | 702  |  |
|           | 753  | 712  |  |
|           | 766  | 740  |  |
|           | 771  | 777  |  |
|           | 823  | 786  |  |
|           | 861  | 797  |  |
|           | 1095 | 1084 |  |
|           | 1107 | 1092 |  |
|           | 1120 | 1108 |  |
|           | 1129 | 1123 |  |
|           | 1136 | 1138 |  |
|           | 1189 | 1153 |  |
|           | 1417 | 1413 |  |
|           | 1421 | 1416 |  |
|           | 1422 | 1421 |  |
|           | 1427 | 1422 |  |
|           | 1431 | 1426 |  |
|           | 1437 | 1433 |  |
|           | 1440 | 1440 |  |
|           | 1447 | 1441 |  |
|           | 1457 | 1447 |  |
|           | 1473 | 1457 |  |
|           | 1867 | 1795 |  |
|           | 3003 | 3005 |  |
|           | 3005 | 3013 |  |
|           | 3021 | 3017 |  |
|           | 3022 | 3035 |  |
|           | 3046 | 3038 |  |
|           | 3072 | 3082 |  |
|           | 3077 | 3087 |  |
|           | 3087 | 3097 |  |
|           | 3107 | 3100 |  |
|           | 3116 | 3122 |  |
|           | 3122 | 3128 |  |
|           | 3134 | 3133 |  |
|           | 3143 | 3138 |  |
|           | 3144 | 3144 |  |
|           | 3154 | 3182 |  |
| <b>12</b> | 84   | 95   |  |
|           | 142  | 124  |  |
|           | 175  | 149  |  |
|           | 184  | 171  |  |
|           | 207  | 189  |  |
|           | 225  | 210  |  |
|           | 231  | 229  |  |

|  |      |      |  |
|--|------|------|--|
|  | 254  | 231  |  |
|  | 276  | 235  |  |
|  | 289  | 261  |  |
|  | 293  | 267  |  |
|  | 312  | 298  |  |
|  | 320  | 303  |  |
|  | 371  | 329  |  |
|  | 397  | 336  |  |
|  | 411  | 432  |  |
|  | 461  | 441  |  |
|  | 464  | 469  |  |
|  | 473  | 502  |  |
|  | 508  | 509  |  |
|  | 533  | 544  |  |
|  | 617  | 637  |  |
|  | 634  | 645  |  |
|  | 665  | 663  |  |
|  | 678  | 681  |  |
|  | 710  | 696  |  |
|  | 752  | 719  |  |
|  | 761  | 728  |  |
|  | 774  | 744  |  |
|  | 803  | 765  |  |
|  | 814  | 779  |  |
|  | 826  | 804  |  |
|  | 1055 | 1080 |  |
|  | 1095 | 1092 |  |
|  | 1110 | 1103 |  |
|  | 1128 | 1108 |  |
|  | 1164 | 1152 |  |
|  | 1401 | 1413 |  |
|  | 1409 | 1417 |  |
|  | 1420 | 1421 |  |
|  | 1422 | 1424 |  |
|  | 1426 | 1425 |  |
|  | 1427 | 1430 |  |
|  | 1435 | 1433 |  |
|  | 1448 | 1447 |  |
|  | 1455 | 1450 |  |
|  | 1458 | 1453 |  |
|  | 2964 | 3006 |  |
|  | 2973 | 3015 |  |
|  | 2981 | 3021 |  |
|  | 3031 | 3023 |  |
|  | 3036 | 3034 |  |
|  | 3047 | 3084 |  |
|  | 3065 | 3103 |  |

|             |      |      |  |
|-------------|------|------|--|
|             | 3080 | 3105 |  |
|             | 3084 | 3111 |  |
|             | 3123 | 3117 |  |
|             | 3131 | 3119 |  |
|             | 3133 | 3122 |  |
|             | 3140 | 3128 |  |
|             | 3140 | 3135 |  |
|             | 3151 | 3154 |  |
|             | 3841 | 3865 |  |
| <b>TS2P</b> | -613 | -693 |  |
|             | 62   | 44   |  |
|             | 129  | 107  |  |
|             | 142  | 138  |  |
|             | 161  | 145  |  |
|             | 192  | 180  |  |
|             | 212  | 193  |  |
|             | 221  | 209  |  |
|             | 226  | 210  |  |
|             | 237  | 220  |  |
|             | 248  | 224  |  |
|             | 266  | 248  |  |
|             | 283  | 275  |  |
|             | 395  | 301  |  |
|             | 420  | 314  |  |
|             | 443  | 425  |  |
|             | 476  | 434  |  |
|             | 501  | 465  |  |
|             | 518  | 477  |  |
|             | 521  | 516  |  |
|             | 551  | 566  |  |
|             | 598  | 571  |  |
|             | 624  | 592  |  |
|             | 648  | 616  |  |
|             | 683  | 623  |  |
|             | 711  | 640  |  |
|             | 720  | 665  |  |
|             | 744  | 703  |  |
|             | 748  | 752  |  |
|             | 787  | 772  |  |
|             | 867  | 807  |  |
|             | 919  | 911  |  |
|             | 1099 | 1041 |  |
|             | 1115 | 1100 |  |
|             | 1121 | 1119 |  |
|             | 1149 | 1125 |  |
|             | 1282 | 1150 |  |
|             | 1318 | 1404 |  |

|          |      |      |     |
|----------|------|------|-----|
|          | 1415 | 1406 |     |
|          | 1419 | 1408 |     |
|          | 1421 | 1411 |     |
|          | 1424 | 1415 |     |
|          | 1433 | 1423 |     |
|          | 1434 | 1428 |     |
|          | 1437 | 1431 |     |
|          | 1439 | 1439 |     |
|          | 1446 | 1444 |     |
|          | 2528 | 2927 |     |
|          | 2926 | 2975 |     |
|          | 2969 | 2976 |     |
|          | 2995 | 2996 |     |
|          | 3005 | 3006 |     |
|          | 3020 | 3045 |     |
|          | 3037 | 3054 |     |
|          | 3047 | 3058 |     |
|          | 3057 | 3065 |     |
|          | 3069 | 3067 |     |
|          | 3093 | 3080 |     |
|          | 3103 | 3091 |     |
|          | 3117 | 3096 |     |
|          | 3122 | 3189 |     |
|          | 3193 | 3263 |     |
|          | 3826 | 3813 |     |
| <b>P</b> | 44   | 50   | 56  |
|          | 50   | 71   | 77  |
|          | 77   | 89   | 86  |
|          | 93   | 92   | 93  |
|          | 111  | 128  | 103 |
|          | 116  | 140  | 110 |
|          | 124  | 145  | 125 |
|          | 154  | 153  | 128 |
|          | 165  | 164  | 146 |
|          | 187  | 183  | 152 |
|          | 188  | 202  | 171 |
|          | 202  | 213  | 182 |
|          | 206  | 218  | 184 |
|          | 233  | 259  | 204 |
|          | 284  | 275  | 205 |
|          | 412  | 437  | 396 |
|          | 444  | 456  | 443 |
|          | 478  | 470  | 453 |
|          | 503  | 499  | 455 |
|          | 510  | 507  | 462 |
|          | 547  | 526  | 474 |
|          | 558  | 536  | 484 |

|  |      |      |      |
|--|------|------|------|
|  | 592  | 564  | 516  |
|  | 611  | 576  | 529  |
|  | 652  | 675  | 542  |
|  | 664  | 688  | 546  |
|  | 670  | 726  | 571  |
|  | 698  | 728  | 577  |
|  | 1076 | 1079 | 1031 |
|  | 1109 | 1110 | 1060 |
|  | 1118 | 1116 | 1077 |
|  | 1127 | 1122 | 1082 |
|  | 1128 | 1128 | 1093 |
|  | 1144 | 1141 | 1125 |
|  | 1159 | 1161 | 1172 |
|  | 1385 | 1386 | 1389 |
|  | 1416 | 1412 | 1412 |
|  | 1422 | 1414 | 1415 |
|  | 1424 | 1418 | 1418 |
|  | 1429 | 1425 | 1420 |
|  | 1431 | 1431 | 1421 |
|  | 1435 | 1432 | 1425 |
|  | 1438 | 1439 | 1427 |
|  | 1442 | 1445 | 1431 |
|  | 1453 | 1455 | 1461 |
|  | 1477 | 1481 | 1475 |
|  | 1501 | 1499 | 1494 |
|  | 2980 | 2961 | 2993 |
|  | 2981 | 2973 | 2995 |
|  | 2984 | 2976 | 2997 |
|  | 2987 | 2978 | 3004 |
|  | 3008 | 3009 | 3032 |
|  | 3036 | 3014 | 3059 |
|  | 3041 | 3031 | 3060 |
|  | 3043 | 3032 | 3065 |
|  | 3046 | 3038 | 3073 |
|  | 3049 | 3043 | 3076 |
|  | 3053 | 3046 | 3077 |
|  | 3054 | 3052 | 3079 |
|  | 3059 | 3053 | 3086 |
|  | 3070 | 3061 | 3088 |
|  | 3108 | 3109 | 3104 |
|  | 3758 | 3746 | 3756 |
